# Supplementary material
Source: publisher site journal article supplement (https://www.spandidos-publications.com/3167/downloadSupplementary)
Supplement: Supplementary file 2 [file downloadSupplementary]

## Sheet: total expression
Table SI. miRNA microarray.
Index	Probe Set ID	Transcript ID(miRNA name)	Accession	log ratio[Test vs. Con]	Regulation[Test vs. Con]	p ([test] Vs [cont])	Tinnitus Group	Non-tinnitus Group	T24.txt	T27.txt	T28.txt	T29.txt	T30.txt	T31.txt	Probe Set Name	Alignments	Sequence Length	Sequence	miRDB	microRNA.org
1	20500924	rno-miR-322-5p	MIMAT0001619	-0.474239	down	0.260387	1.35553	1.82977	1.43737	1.31715	2.52299	1.20268	1.52896	1.54677	MIMAT0001619_st	X:140000212-140000233 (-)	22	CAGCAGCAAUUCAUGUUUUGGA	rno-miR-322-5p	rno-miR-322-5p
2	20500925	rno-miR-322-3p	MIMAT0000547	0.105292	up	0.786497	1.91691	1.81161	1.61491	1.55137	1.4828	1.80846	2.33713	2.39088	MIMAT0000547_st	X:140000176-140000195 (-)	20	AAACAUGAAGCGCUGCAACA	rno-miR-322-3p	rno-miR-322-3p
3	20500928	rno-miR-323-5p	MIMAT0004637	0.0316893	up	0.934789	4.51635	4.48467	5.00235	4.56447	3.85649	4.25125	4.59516	4.73334	MIMAT0004637_st	6:134391712-134391733 (+)	22	AGGUGGUCCGUGGCGCGUUCGC	rno-miR-323-5p	rno-miR-323-5p
4	20500929	rno-miR-323-3p	MIMAT0000550	0.265307	up	0.393883	1.7788	1.51349	1.62529	1.76216	1.42118	2.25708	1.49401	1.31715	MIMAT0000550_st	6:134391747-134391767 (+)	21	CACAUUACACGGUCGACCUCU	rno-miR-323-3p	rno-miR-323-3p
5	20500932	rno-miR-301a-5p	MIMAT0017026	-0.0118511	down	0.957474	0.751313	0.763164	1.08842	0.662122	0.449583	0.946848	0.751492	0.644968	MIMAT0017026_st	10:75386861-75386881 (+)	21	GCUCUGACUUUAUUGCACUAC	rno-miR-301a-5p	rno-miR-301a-5p
6	20500933	rno-miR-301a-3p	MIMAT0000552	0.189032	up	0.670276	6.60253	6.4135	6.82101	5.90238	6.20974	6.82101	6.20974	7.08419	MIMAT0000552_st	10:75386898-75386920 (+)	23	CAGUGCAAUAGUAUUGUCAAAGC	rno-miR-301a-3p	rno-miR-301a-3p
7	20500934	rno-miR-324-5p	MIMAT0000553	0.42393	up	0.263793	5.03198	4.60805	4.66222	4.72169	4.48771	4.70087	4.67422	5.67339	MIMAT0000553_st	10:56858053-56858075 (+)	23	CGCAUCCCCUAGGGCAUUGGUGU	rno-miR-324-5p	rno-miR-324-5p
8	20500935	rno-miR-324-3p	MIMAT0000554	0.0697067	up	0.837744	9.07805	9.00835	9.41714	9.20783	8.73916	9.41714	8.86873	8.60919	MIMAT0000554_st	10:56858088-56858109 (+)	22	CCACUGCCCCAGGUGCUGCUGG	rno-miR-324-3p	rno-miR-324-3p
9	20500938	rno-miR-325-5p	MIMAT0000557	-0.0973296	down	0.450281	1.14304	1.24037	1.41233	0.994525	1.11016	1.21937	1.19861	1.21521	MIMAT0000557_st	X:93480479-93480501 (-)	23	CCUAGUAGGUGCUCAGUAAGUGU	rno-miR-325-5p	rno-miR-325-5p
10	20500939	rno-miR-325-3p	MIMAT0004639	-0.0923428	down	0.203472	0.740023	0.832366	0.847775	0.69435	0.913327	0.801435	0.735995	0.724283	MIMAT0004639_st	X:93480442-93480463 (-)	22	UUUAUUGAGCACCUCCUAUCAA	rno-miR-325-3p	rno-miR-325-3p
11	20500944	rno-miR-326-5p	MIMAT0017028	-0.195022	down	0.476358	2.16295	2.35797	2.55659	2.01945	2.61145	2.35995	1.90588	2.10946	MIMAT0017028_st	1:156887532-156887551 (+)	20	GGGGGCAGGGCCUUUGUGAA	rno-miR-326-5p	rno-miR-326-5p
12	20500945	rno-miR-326-3p	MIMAT0000560	0.264656	up	0.266399	7.47098	7.20633	7.51222	7.38169	6.9197	7.69489	7.18706	7.33636	MIMAT0000560_st	1:156887572-156887592 (+)	21	CCUCUGGGCCCUUCCUCCAGU	rno-miR-326-3p	rno-miR-326-3p
13	20500946	rno-miR-327	MIMAT0000561	0.0907921	up	0.613573	0.818614	0.727822	0.75322	0.53076	0.627007	0.851592	0.803238	1.07349	MIMAT0000561_st	---	19	CCUUGAGGGGCAUGAGGGU	rno-miR-327	rno-miR-327
14	20500947	rno-let-7d-5p	MIMAT0000562	-0.144601	down	0.734172	3.29126	3.43587	2.71742	3.5128	3.88954	2.98007	3.70063	3.38093	MIMAT0000562_st	17:22121907-22121928 (+)	22	AGAGGUAGUAGGUUGCAUAGUU	rno-let-7d-5p	rno-let-7d-5p
15	20500948	rno-let-7d-3p	MIMAT0000563	-0.0725629	down	0.732698	7.37579	7.44835	7.12451	7.33636	7.54272	7.57812	7.67782	7.21288	MIMAT0000563_st	17:22121961-22121982 (+)	22	CUAUACGACCUGCUGCCUUUCU	rno-let-7d-3p	rno-let-7d-3p
16	20500949	rno-miR-328a-5p	MIMAT0017029	-0.155272	down	0.625031	3.71207	3.86734	4.00784	4.11861	3.97166	3.20949	3.62254	3.80811	MIMAT0017029_st	19:35122612-35122630 (-)	19	GGGGGGCAGGAGGGGCUCA	rno-miR-328a-5p	rno-miR-328a-5p
17	20500950	rno-miR-328a-3p	MIMAT0000564	-0.191078	down	0.531309	0.845301	1.03638	0.824057	1.17895	1.47507	0.601298	0.810012	0.755657	MIMAT0000564_st	19:35122569-35122590 (-)	22	CUGGCCCUCUCUGCCCUUCCGU	rno-miR-328a-3p	rno-miR-328a-3p
18	20500953	rno-miR-329-5p	MIMAT0017031	0.292271	up	0.0340222	0.963149	0.670878	0.546202	1.06868	0.664998	0.940695	0.801435	0.880072	MIMAT0017031_st	6:134392688-134392711 (+)	24	AGAGGUUUUCUGGGUCUCUGUUUC	rno-miR-329-5p	rno-miR-329-5p
19	20500954	rno-miR-329-3p	MIMAT0000566	0.429089	up	0.2531	4.36589	3.9368	4.39387	4.48771	3.33833	4.38071	4.07819	4.22923	MIMAT0000566_st	6:134392726-134392747 (+)	22	AACACACCCAGCUAACCUUUUU	rno-miR-329-3p	rno-miR-329-3p
20	20500957	rno-miR-330-5p	MIMAT0004641	0.321481	up	0.160742	1.59715	1.27567	1.21521	1.27441	1.35439	1.90588	1.25739	1.61115	MIMAT0004641_st	1:78544338-78544359 (+)	22	UCUCUGGGCCUGUGUCUUAGGC	rno-miR-330-5p	rno-miR-330-5p
21	20500958	rno-miR-330-3p	MIMAT0000568	-0.0818172	down	0.642931	0.814942	0.896759	1.01549	0.693108	0.601298	0.927662	1.07349	0.824057	MIMAT0000568_st	1:78544377-78544399 (+)	23	GCAAAGCACAGGGCCUGCAGAGA	rno-miR-330-3p	rno-miR-330-3p
22	20500961	rno-miR-331-5p	MIMAT0017033	0.0722534	up	0.671405	1.21733	1.14508	1.23737	1.27441	1.20924	1.42118	0.988633	0.956417	MIMAT0017033_st	7:31089835-31089853 (-)	19	GGUCUUGUUUGGGUUUGUU	rno-miR-331-5p	rno-miR-331-5p
23	20500962	rno-miR-331-3p	MIMAT0000570	0.692481	up	0.270547	2.54035	1.84787	1.90588	3.5689	1.69263	1.76216	1.94511	2.29	MIMAT0000570_st	7:31089779-31089799 (-)	21	GCCCCUGGGCCUAUCCUAGAA	rno-miR-331-3p	rno-miR-331-3p
24	20500965	rno-miR-140-5p	MIMAT0000573	0.549483	up	0.104193	3.48396	2.93447	3.27538	3.25233	2.91444	3.36255	2.6136	3.83699	MIMAT0000573_st	19:37422725-37422746 (+)	22	CAGUGGUUUUACCCUAUGGUAG	rno-miR-140-5p	rno-miR-140-5p
25	20500966	rno-miR-140-3p	MIMAT0000574	0.527835	up	0.124209	3.50064	2.97281	2.46184	3.32375	3.27642	3.60384	3.18015	3.57433	MIMAT0000574_st	19:37422764-37422784 (+)	21	UACCACAGGGUAGAACCACGG	rno-miR-140-3p	rno-miR-140-3p
26	20500967	rno-miR-335	MIMAT0000575	-0.703561	down	0.241989	3.20681	3.91037	4.74959	3.05303	3.94983	3.46325	3.0317	3.10415	MIMAT0000575_st	---	23	UCAAGAGCAAUAACGAAAAAUGU	rno-miR-335	rno-miR-335
27	20500968	rno-miR-336-5p	MIMAT0000576	0.55955	up	0.264716	2.85869	2.29914	3.13132	2.77218	1.75101	2.77218	2.01508	3.0317	MIMAT0000576_st	10:35360551-35360571 (+)	21	UCACCCUUCCAUAUCUAGUCU	rno-miR-336-5p	rno-miR-336-5p
28	20500969	rno-miR-336-3p	MIMAT0017034	0.275058	up	0.256562	3.96909	3.69403	3.77507	4.03753	3.315	4.01702	3.99203	3.85272	MIMAT0017034_st	10:35360587-35360610 (+)	24	ACUGGAUUCCAUGAAGGGAUGUGA	rno-miR-336-3p	rno-miR-336-3p
29	20500970	rno-miR-337-5p	MIMAT0017035	-0.253162	down	0.518851	3.56898	3.82214	4.16275	2.95158	3.75696	3.84242	3.54672	3.91295	MIMAT0017035_st	6:134176779-134176799 (+)	21	CGGCGUCAUGCAGGAGUUGAU	rno-miR-337-5p	rno-miR-337-5p
30	20500971	rno-miR-337-3p	MIMAT0000577	0.253902	up	0.288257	1.64164	1.38774	1.28598	1.27441	1.31715	1.75101	1.56009	1.8995	MIMAT0000577_st	6:134176810-134176832 (+)	23	UUCAGCUCCUAUAUGAUGCCUUU	rno-miR-337-3p	rno-miR-337-3p
31	20500974	rno-miR-148b-5p	MIMAT0004645	0.0072519	up	0.957956	6.06985	6.06259	6.11986	5.92066	6.00914	5.97016	6.05878	6.31871	MIMAT0004645_st	7:142195717-142195738 (+)	22	GAAGUUCUGUUAUACACUCAGG	rno-miR-148b-5p	rno-miR-148b-5p
32	20500975	rno-miR-148b-3p	MIMAT0000579	-0.019064	down	0.373901	11.8397	11.8588	11.8588	11.8016	11.8588	11.8588	11.8588	11.8588	MIMAT0000579_st	7:142195754-142195775 (+)	22	UCAGUGCAUCACAGAACUUUGU	rno-miR-148b-3p	rno-miR-148b-3p
33	20500978	rno-miR-338-5p	MIMAT0004646	-0.0333382	down	0.801603	1.41503	1.44837	1.36149	1.44071	1.3687	1.56013	1.61491	1.24425	MIMAT0004646_st	10:109427031-109427052 (-)	22	AACAAUAUCCUGGUGCUGAGUG	rno-miR-338-5p	rno-miR-338-5p
34	20500979	rno-miR-338-3p	MIMAT0000581	0.138947	up	0.608161	1.2867	1.14776	0.74864	1.06121	1.26283	1.24792	1.4318	1.55097	MIMAT0000581_st	10:109426995-109427017 (-)	23	UCCAGCAUCAGUGAUUUUGUUGA	rno-miR-338-3p	rno-miR-338-3p
35	20500982	rno-miR-339-5p	MIMAT0000583	-0.0762961	down	0.793076	1.00453	1.08082	1.54677	1.22853	0.70923	0.843177	0.98647	0.941873	MIMAT0000583_st	12:15778338-15778360 (+)	23	UCCCUGUCCUCCAGGAGCUCACG	rno-miR-339-5p	rno-miR-339-5p
36	20500983	rno-miR-339-3p	MIMAT0004648	0.757432	up	0.226657	5.54666	4.78922	4.27661	5.78193	4.52623	4.8489	5.56483	6.00914	MIMAT0004648_st	12:15778373-15778395 (+)	23	UGAGCGCCUCGACGACAGAGCCA	rno-miR-339-3p	rno-miR-339-3p
37	20500986	rno-miR-340-5p	MIMAT0004650	-0.401601	down	0.322001	1.37118	1.77278	1.79442	0.689158	1.66168	1.85461	1.86226	1.56978	MIMAT0004650_st	---	22	UUAUAAAGCAAUGAGACUGAUU	rno-miR-340-5p	rno-miR-340-5p
38	20500987	rno-miR-340-3p	MIMAT0000585	0.137995	up	0.766516	4.1731	4.0351	4.22229	3.44874	3.66073	4.79394	4.22229	4.27661	MIMAT0000585_st	---	23	UCCGUCUCAGUUACUUUAUAGCC	rno-miR-340-3p	rno-miR-340-3p
39	20500990	rno-miR-341	MIMAT0000587	0.0823258	up	0.841148	4.37164	4.28932	4.57806	4.16275	3.8756	5.00235	4.41431	3.94983	MIMAT0000587_st	6:134203574-134203594 (+)	21	UCGGUCGAUCGGUCGGUCGGU	rno-miR-341	rno-miR-341
40	20500993	rno-miR-342-5p	MIMAT0004652	-0.397684	down	0.167639	0.898644	1.29633	1.11016	1.18736	1.44484	1.02978	1.33398	0.478792	MIMAT0004652_st	6:132990815-132990836 (+)	22	AGGGGUGCUAUCUGUGAUUGAG	rno-miR-342-5p	rno-miR-342-5p
41	20500994	rno-miR-342-3p	MIMAT0000589	0.370752	up	0.482651	4.94827	4.57752	5.1147	4.59516	4.77544	5.52797	3.84242	4.72169	MIMAT0000589_st	6:132990857-132990879 (+)	23	UCUCACACAGAAAUCGCACCCGU	rno-miR-342-3p	rno-miR-342-3p
42	20500997	rno-miR-343	MIMAT0000591	0.142246	up	0.605924	7.9026	7.76035	8.12828	7.82641	7.74341	8.18649	7.40936	7.69489	MIMAT0000591_st	1:78904631-78904650 (+)	20	UCUCCCUCCGUGUGCCCAGA	rno-miR-343	rno-miR-343
43	20500998	rno-miR-344a-5p	MIMAT0004654	0.678207	up	0.089752	4.20953	3.53132	3.5128	4.22229	3.13132	3.87153	3.94983	4.53475	MIMAT0004654_st	1:116021036-116021059 (-)	24	UCAGGCUCCUGGCUAGAUUCCAGG	rno-miR-344a-5p	rno-miR-344a-5p
44	20500999	rno-miR-344a-3p	MIMAT0000592	-0.052255	down	0.855	3.23505	3.28731	3.0317	3.66073	3.49189	2.86428	3.33833	3.18015	MIMAT0000592_st	1:116020999-116021021 (-)	23	UGAUCUAGCCAAAGCCUGACCGU	rno-miR-344a-3p	rno-miR-344a-3p
45	20501002	rno-miR-345-5p	MIMAT0000594	0.0679768	up	0.89441	2.72843	2.66046	2.21105	3.27642	2.68358	1.92881	3.08673	2.98007	MIMAT0000594_st	6:133178821-133178841 (+)	21	UGCUGACCCCUAGUCCAGUGC	rno-miR-345-5p	rno-miR-345-5p
46	20501003	rno-miR-345-3p	MIMAT0004655	-0.155474	down	0.757571	7.24819	7.40367	7.40936	7.92968	7.46528	7.46528	7.33636	6.34962	MIMAT0004655_st	6:133178859-133178880 (+)	22	CCCUGAACUAGGGGUCUGGAGA	rno-miR-345-3p	rno-miR-345-3p
47	20501006	rno-miR-346	MIMAT0000596	0.309176	up	0.206618	1.75271	1.44353	1.45384	1.73372	1.28741	1.44071	1.58934	2.0837	MIMAT0000596_st	16:10553500-10553522 (+)	23	UGUCUGCCUGAGUGCCUGCCUCU	rno-miR-346	rno-miR-346
48	20501009	rno-miR-347	MIMAT0000598	0.25506	up	0.067016	4.17738	3.92232	4.01702	4.00784	3.83699	4.302	3.91295	4.22229	MIMAT0000598_st	---	19	UGUCCCUCUGGGUCGCCCA	rno-miR-347	rno-miR-347
49	20501010	rno-miR-349	MIMAT0000599	-0.383351	down	0.0966844	0.798984	1.18234	1.09511	0.765033	1.47911	0.969798	0.972782	0.662122	MIMAT0000599_st	7:127468182-127468203 (-)	22	CAGCCCUGCUGUCUUAACCUCU	rno-miR-349	rno-miR-349
50	20501011	rno-miR-129-5p	MIMAT0000600	-0.0454643	down	0.772294	7.9118	7.95726	7.92968	8.18649	8.05197	7.74341	7.89013	7.80549	MIMAT0000600_st	3:78648989-78649009 (-) // 4:55892167-55892187 (+)	21	CUUUUUGCGGUCUGGGCUUGC	rno-miR-129-5p	rno-miR-129-5p
51	20501012	rno-miR-129-2-3p	MIMAT0000601	0.052431	up	0.659136	10.07	10.0176	9.86959	10.0584	10.2125	10.0031	9.97053	10.1485	MIMAT0000601_st	3:78648946-78648967 (-)	22	AAGCCCUUACCCCAAAAAGCAU	rno-miR-129-2-3p	rno-miR-129-2-3p
52	20501013	rno-miR-20a-5p	MIMAT0000602	0.0922021	up	0.826491	1.06369	0.971486	1.68607	0.83272	0.697627	1.3687	0.53076	0.989645	MIMAT0000602_st	15:99854205-99854227 (+)	23	UAAAGUGCUUAUAGUGCAGGUAG	rno-miR-20a-5p	rno-miR-20a-5p
53	20501014	rno-miR-20a-3p	MIMAT0000603	-0.326772	down	0.215274	4.82303	5.1498	4.88397	4.68012	5.43005	5.13539	5.13539	4.65358	MIMAT0000603_st	15:99854241-99854261 (+)	21	ACUGCAUUACGAGCACUUACA	rno-miR-20a-3p	rno-miR-20a-3p
54	20501015	rno-miR-350	MIMAT0000604	-0.321495	down	0.285563	3.09314	3.41463	3.07067	3.46461	3.68134	2.96425	3.49189	2.85055	MIMAT0000604_st	13:92545090-92545113 (-)	24	UUCACAAAGCCCAUACACUUUCAC	rno-miR-350	rno-miR-350
55	20501018	rno-miR-7a-5p	MIMAT0000606	0.0746695	up	0.829232	3.84315	3.76848	3.47641	3.33833	4.15361	4.03753	3.67544	4.15361	MIMAT0000606_st	1:134607282-134607304 (+) // 17:12204100-12204122 (+)	23	UGGAAGACUAGUGAUUUUGUUGU	rno-miR-7a-5p	rno-miR-7a-5p
56	20501019	rno-miR-7a-1-3p	MIMAT0000607	0.134278	up	0.233492	7.4881	7.35382	7.33636	7.40936	7.21288	7.54272	7.51222	7.51222	MIMAT0000607_st	17:12204141-12204162 (+)	22	ACAACAAAUCACAGUCUGCCAU	rno-miR-7a-1-3p	rno-miR-7a-1-3p
57	20501020	rno-miR-351-5p	MIMAT0000608	-0.724739	down	0.346705	2.75029	3.47503	3.57433	3.82504	3.57433	2.91444	3.27642	1.51138	MIMAT0000608_st	X:139999171-139999195 (-)	25	UCCCUGAGGAGCCCUUUGAGCCUGA	rno-miR-351-5p	rno-miR-351-5p
58	20501021	rno-miR-351-3p	MIMAT0017041	0.0429218	up	0.797413	7.95269	7.90977	8.05197	8.12828	7.85093	8.05197	7.82641	7.67782	MIMAT0017041_st	X:139999135-139999155 (-)	21	GGUCAAGAGGCGCCUGGGAAC	rno-miR-351-3p	rno-miR-351-3p
59	20501024	rno-miR-352	MIMAT0000610	0.0288239	up	0.867217	5.44634	5.41752	5.67339	5.28939	5.22389	5.44368	5.35529	5.60596	MIMAT0000610_st	---	21	AGAGUAGUAGGUUGCAUAGUA	rno-miR-352	rno-miR-352
60	20501025	rno-miR-135b-5p	MIMAT0000611	-0.252938	down	0.567335	6.72322	6.97615	6.9825	6.31315	7.57812	6.874	6.36784	6.9825	MIMAT0000611_st	13:45078807-45078829 (+)	23	UAUGGCUUUUCAUUCCUAUGUGA	rno-miR-135b-5p	rno-miR-135b-5p
61	20501026	rno-miR-135b-3p	MIMAT0017043	0.0522302	up	0.935939	1.64535	1.59312	2.44071	0.927662	1.44484	2.3467	0.89379	1.66168	MIMAT0017043_st	13:45078846-45078867 (+)	22	AUGUAGGGCUAAAAGCCAUGGG	rno-miR-135b-3p	rno-miR-135b-3p
62	20501029	rno-miR-151-5p	MIMAT0000613	0.352956	up	0.149785	1.3977	1.04474	1.28179	1.23447	1.11273	1.33398	0.739702	1.62463	MIMAT0000613_st	7:110979357-110979377 (-)	21	UCGAGGAGCUCACAGUCUAGU	rno-miR-151-5p	rno-miR-151-5p
63	20501030	rno-miR-151-3p	MIMAT0000614	-0.0729957	down	0.116117	12.8807	12.9536	12.9536	12.8442	12.9536	12.9536	12.9536	12.8442	MIMAT0000614_st	7:110979322-110979342 (-)	21	CUAGACUGAGGCUCCUUGAGG	rno-miR-151-3p	rno-miR-151-3p
64	20501031	rno-miR-101b-5p	MIMAT0017045	0.125649	up	0.495117	5.9793	5.85365	5.98344	5.97016	5.81871	5.71802	5.7588	6.24971	MIMAT0017045_st	1:232779607-232779628 (+)	22	UCGGUUAUCAUGGUACCGAUGC	rno-miR-101b-5p	rno-miR-101b-5p
65	20501032	rno-miR-101b-3p	MIMAT0000615	0.0491856	up	0.838388	0.728705	0.679519	0.578455	1.10445	0.899118	0.435268	0.560985	0.6464	MIMAT0000615_st	1:232779644-232779664 (+)	21	UACAGUACUGUGAUAGCUGAA	rno-miR-101b-3p	rno-miR-101b-3p
66	20501315	rno-let-7a-5p	MIMAT0000774	-0.262301	down	0.609756	5.6022	5.8645	6.14797	5.71802	5.83958	6.31315	5.60596	4.77544	MIMAT0000774_st	17:22119779-22119800 (+) // 8:44525785-44525806 (+)	22	UGAGGUAGUAGGUUGUAUAGUU	rno-let-7a-5p	rno-let-7a-5p
67	20501316	rno-let-7a-1-3p	MIMAT0017085	0.515917	up	0.39922	2.49375	1.97784	2.2475	2.08986	2.13924	3.49189	1.54677	1.8995	MIMAT0017085_st	17:22119830-22119851 (+)	22	CUAUACAAUCUACUGUCUUUCC	rno-let-7a-1-3p	rno-let-7a-1-3p
68	20501317	rno-let-7a-2-3p	MIMAT0017086	0.112093	up	0.705172	1.62628	1.51418	1.38009	1.27441	1.92096	1.88181	1.2415	1.72261	MIMAT0017086_st	8:44525830-44525851 (+)	22	CUGUACAGCCUCCUAGCUUUCC	rno-let-7a-2-3p	rno-let-7a-2-3p
69	20501318	rno-let-7b-5p	MIMAT0000775	0.129197	up	0.5901	0.952521	0.823323	0.606197	0.956417	0.689158	1.17895	1.17461	0.722198	MIMAT0000775_st	7:123701211-123701232 (+)	22	UGAGGUAGUAGGUUGUGUGGUU	rno-let-7b-5p	rno-let-7b-5p
70	20501319	rno-let-7b-3p	MIMAT0004705	0.0895079	up	0.749076	5.63803	5.54853	5.35529	5.77185	5.70829	5.17209	5.582	5.97016	MIMAT0004705_st	7:123701265-123701286 (+)	22	CUAUACAACCUACUGCCUUCCC	rno-let-7b-3p	rno-let-7b-3p
71	20501320	rno-let-7c-5p	MIMAT0000776	-0.174606	down	0.156824	6.25526	6.42986	6.57021	6.14797	6.39511	6.23443	6.32426	6.38337	MIMAT0000776_st	11:16398279-16398300 (+) // 7:123700803-123700824 (+)	22	UGAGGUAGUAGGUUGUAUGGUU	rno-let-7c-5p	rno-let-7c-5p
72	20501321	rno-let-7c-1-3p	MIMAT0017087	-0.720018	down	0.16516	3.14098	3.861	3.94983	3.22774	3.82504	3.82504	3.80811	2.37016	MIMAT0017087_st	11:16398324-16398345 (+)	22	CUGUACAACCUUCUAGCUUUCC	rno-let-7c-1-3p	rno-let-7c-1-3p
73	20501322	rno-let-7c-2-3p	MIMAT0017088	-0.235165	down	0.292212	5.46339	5.69856	5.63716	5.40945	5.71802	5.81871	5.74049	5.16202	MIMAT0017088_st	7:123700851-123700872 (+)	22	CUAUACAAUCUACUGUCUUUCC	rno-let-7c-2-3p	rno-let-7c-2-3p
74	20501323	rno-let-7e-5p	MIMAT0000777	0.0352072	up	0.85855	7.01064	6.97544	7.06981	6.65781	6.9825	7.18706	6.874	7.18706	MIMAT0000777_st	1:56487148-56487169 (+)	22	UGAGGUAGGAGGUUGUAUAGUU	rno-let-7e-5p	rno-let-7e-5p
75	20501324	rno-let-7e-3p	MIMAT0004706	-0.0882513	down	0.858052	1.44382	1.53207	1.8209	2.2475	1.56009	1.29846	1.21521	0.785492	MIMAT0004706_st	1:56487193-56487214 (+)	22	CUAUACGGCCUCCUAGCUUUCC	rno-let-7e-3p	rno-let-7e-3p
76	20501325	rno-let-7f-5p	MIMAT0000778	-0.0624384	down	0.891567	1.66941	1.73185	1.1403	2.11341	2.18233	1.79442	1.87293	1.10041	MIMAT0000778_st	17:22120142-22120163 (+) // X:41376950-41376971 (+)	22	UGAGGUAGUAGAUUGUAUAGUU	rno-let-7f-5p	rno-let-7f-5p
77	20501326	rno-let-7f-1-3p	MIMAT0017089	-0.197077	down	0.656665	3.4006	3.59768	2.95158	3.15007	3.60384	3.31062	4.23763	3.74112	MIMAT0017089_st	17:22120198-22120218 (+)	21	CUAUACAAUCUAUUGCCUUCC	rno-let-7f-1-3p	rno-let-7f-1-3p
78	20501327	rno-let-7f-2-3p	MIMAT0017090	0	down	1	12.1021	12.1021	12.1021	12.1021	12.1021	12.1021	12.1021	12.1021	MIMAT0017090_st	X:41377000-41377020 (+)	21	CUAUACAGUCUACUGUCUUUC	rno-let-7f-2-3p	rno-let-7f-2-3p
79	20501328	rno-let-7i-5p	MIMAT0000779	-0.16145	down	0.64967	8.94383	9.10528	9.26549	9.41714	9.07545	9.07545	8.97488	8.33888	MIMAT0000779_st	7:62755418-62755439 (-)	22	UGAGGUAGUAGUUUGUGCUGUU	rno-let-7i-5p	rno-let-7i-5p
80	20501329	rno-let-7i-3p	MIMAT0004707	-0.202844	down	0.21442	5.87629	6.07914	6.05878	6.09785	6.05878	5.90238	6.11986	5.62865	MIMAT0004707_st	7:62755362-62755383 (-)	22	CUGCGCAAGCUACUGCCUUGCU	rno-let-7i-3p	rno-let-7i-3p
81	20501330	rno-miR-7a-2-3p	MIMAT0017091	0.119365	up	0.776633	2.62681	2.50745	1.8941	2.54692	3.15007	2.92017	2.47818	2.41335	MIMAT0017091_st	1:134607320-134607341 (+)	22	CAACAAGUCCCAGUCUGCCACA	rno-miR-7a-2-3p	rno-miR-7a-2-3p
82	20501331	rno-miR-7b	MIMAT0000780	-0.0642069	down	0.679838	4.95043	5.01463	5.28939	5.03387	4.8489	4.90425	4.90561	4.91316	MIMAT0000780_st	---	23	UGGAAGACUUGUGAUUUUGUUGU	rno-miR-7b	rno-miR-7b
83	20501332	rno-miR-9a-5p	MIMAT0000781	-0.101303	down	0.481042	0.664945	0.766248	0.728494	0.798043	0.827052	0.785492	0.743198	0.4113	MIMAT0000781_st	1:135254148-135254170 (+) // 2:12259555-12259577 (-) // 2:180293024-180293046 (+)	23	UCUUUGGUUAUCUAGCUGUAUGA	rno-miR-9a-5p	rno-miR-9a-5p
84	20501333	rno-miR-9a-3p	MIMAT0004708	0.0969295	up	0.452527	0.931981	0.835052	0.867868	1.04038	0.662122	0.796155	0.975165	0.959407	MIMAT0004708_st	1:135254187-135254208 (+) // 2:12259519-12259540 (-) // 2:180293063-180293084 (+)	22	AUAAAGCUAGAUAACCGAAAGU	rno-miR-9a-3p	rno-miR-9a-3p
85	20501334	rno-miR-10a-5p	MIMAT0000782	0.016695	up	0.908741	8.39763	8.38093	8.23685	8.53223	8.53223	8.47416	8.37372	8.18649	MIMAT0000782_st	10:85049335-85049357 (+)	23	UACCCUGUAGAUCCGAAUUUGUG	rno-miR-10a-5p	rno-miR-10a-5p
86	20501335	rno-miR-10a-3p	MIMAT0004709	0.186845	up	0.296989	4.46258	4.27574	4.074	4.6932	4.3389	4.38071	4.41431	4.31382	MIMAT0004709_st	10:85049376-85049397 (+)	22	CAAAUUCGUAUCUAGGGGAAUA	rno-miR-10a-3p	rno-miR-10a-3p
87	20501336	rno-miR-10b-5p	MIMAT0000783	-0.67279	down	0.263093	3.8165	4.48929	4.64422	4.61061	4.94399	3.58656	3.87966	3.25233	MIMAT0000783_st	3:57340880-57340901 (+)	22	CCCUGUAGAACCGAAUUUGUGU	rno-miR-10b-5p	rno-miR-10b-5p
88	20501337	rno-miR-10b-3p	MIMAT0017092	-0.00117253	down	0.99756	5.16441	5.16558	4.52623	5.19582	5.77185	5.16202	5.19867	5.13539	MIMAT0017092_st	3:57340917-57340937 (+)	21	ACAGAUUCGAUUCUAGGGGAA	rno-miR-10b-3p	rno-miR-10b-3p
89	20501338	rno-miR-15b-5p	MIMAT0000784	-0.226291	down	0.7147	5.96819	6.19448	6.31315	4.86239	6.34962	6.67434	5.92066	6.36784	MIMAT0000784_st	2:158992253-158992274 (+)	22	UAGCAGCACAUCAUGGUUUACA	rno-miR-15b-5p	rno-miR-15b-5p
90	20501339	rno-miR-15b-3p	MIMAT0017093	0.455825	up	0.0197326	6.86281	6.40698	6.51269	6.80215	6.31315	6.71646	6.39511	7.06981	MIMAT0017093_st	2:158992291-158992312 (+)	22	CGAAUCAUUAUUUGCUGCUCUA	rno-miR-15b-3p	rno-miR-15b-3p
91	20501340	rno-miR-16-5p	MIMAT0000785	0.0465575	up	0.86126	0.837777	0.791219	0.816027	0.435268	0.528007	1.08842	1.02962	0.989645	MIMAT0000785_st	2:158992399-158992420 (+)	22	UAGCAGCACGUAAAUAUUGGCG	rno-miR-16-5p	rno-miR-16-5p
92	20501341	rno-miR-16-3p	MIMAT0017094	0.111235	up	0.599934	10.6473	10.5361	10.5941	10.3221	10.4201	10.6508	10.5941	10.9691	MIMAT0017094_st	2:158992441-158992461 (+)	21	ACCAAUAUUAUUGUGCUGCUU	rno-miR-16-3p	rno-miR-16-3p
93	20501342	rno-miR-17-5p	MIMAT0000786	-0.0864157	down	0.738953	10.4979	10.5843	10.2125	10.7402	10.8001	10.5408	10.7402	10.2125	MIMAT0000786_st	15:99853748-99853770 (+) // X:139741489-139741511 (-)	23	CAAAGUGCUUACAGUGCAGGUAG	rno-miR-17-5p	rno-miR-17-5p
94	20501343	rno-miR-17-1-3p	MIMAT0004710	-0.290798	down	0.359213	3.45312	3.74392	3.68134	3.01746	4.074	3.62254	3.47641	3.71936	MIMAT0004710_st	15:99853785-99853806 (+)	22	ACUGCAGUGAAGGCACUUGUGG	rno-miR-17-1-3p	rno-miR-17-1-3p
95	20501344	rno-miR-18a-5p	MIMAT0000787	0.241553	up	0.605472	3.06332	2.82177	2.11543	2.92017	2.78097	3.25233	3.5689	3.01746	MIMAT0000787_st	15:99853887-99853909 (+)	23	UAAGGUGCAUCUAGUGCAGAUAG	rno-miR-18a-5p	rno-miR-18a-5p
96	20501345	rno-miR-18a-3p	MIMAT0017095	0.0209134	up	0.846035	4.06436	4.04345	3.98324	4.074	4.01702	4.21639	4.13008	3.90269	MIMAT0017095_st	15:99853928-99853948 (+)	21	ACUGCCCUAAGUGCUCCUUCU	rno-miR-18a-3p	rno-miR-18a-3p
97	20501346	rno-miR-19b-1-5p	MIMAT0017096	0.0648752	up	0.522254	11.115	11.0501	11.1316	10.9691	11.0496	11.1316	10.9691	11.2442	MIMAT0017096_st	15:99854335-99854356 (+)	22	AGUUUUGCAGGUUUGCAUCCAG	rno-miR-19b-1-5p	rno-miR-19b-1-5p
98	20501347	rno-miR-19b-3p	MIMAT0000788	0.183728	up	0.444015	11.5353	11.3516	11.6789	11.3391	11.2442	11.4652	11.1316	11.8016	MIMAT0000788_st	15:99854373-99854395 (+) // X:139740944-139740966 (-)	23	UGUGCAAAUCCAUGCAAAACUGA	rno-miR-19b-3p	rno-miR-19b-3p
99	20501348	rno-miR-19b-2-5p	MIMAT0017097	0.123715	up	0.440395	5.20222	5.0785	4.98749	5.25321	5.10445	4.94399	5.14357	5.40945	MIMAT0017097_st	X:139740987-139741009 (-)	23	AGUUUUGCAGAUUUGCAGUUCAG	rno-miR-19b-2-5p	rno-miR-19b-2-5p
100	20501349	rno-miR-19a-5p	MIMAT0017098	0.705196	up	0.129958	4.62551	3.92031	4.13008	4.46929	4.40312	4.82919	3.22774	4.57806	MIMAT0017098_st	15:99854030-99854049 (+)	20	UCGUUUUGCAUAGUUGCACU	rno-miR-19a-5p	rno-miR-19a-5p
101	20501350	rno-miR-19a-3p	MIMAT0000789	-0.124201	down	0.194363	6.44815	6.57235	6.48904	6.48904	6.57021	6.32426	6.65781	6.53115	MIMAT0000789_st	15:99854066-99854088 (+)	23	UGUGCAAAUCUAUGCAAAACUGA	rno-miR-19a-3p	rno-miR-19a-3p
102	20501351	rno-miR-21-5p	MIMAT0000790	0.0786806	up	0.870665	2.06876	1.99008	1.27291	1.58934	2.39088	2.07001	2.30644	2.54692	MIMAT0000790_st	10:74864553-74864574 (-)	22	UAGCUUAUCAGACUGAUGUUGA	rno-miR-21-5p	rno-miR-21-5p
103	20501352	rno-miR-21-3p	MIMAT0004711	0.0646117	up	0.860244	3.07543	3.01082	3.49189	3.31822	2.64425	2.60505	2.8963	3.30301	MIMAT0004711_st	10:74864515-74864536 (-)	22	CAACAGCAGUCGAUGGGCUGUC	rno-miR-21-3p	rno-miR-21-3p
104	20501353	rno-miR-22-5p	MIMAT0003152	-0.0357951	down	0.911782	5.00232	5.03811	5.19724	4.88027	4.6932	4.64422	5.22389	5.48246	MIMAT0003152_st	10:62782741-62782762 (+)	22	AGUUCUUCAGUGGCAAGCUUUA	rno-miR-22-5p	rno-miR-22-5p
105	20501354	rno-miR-22-3p	MIMAT0000791	0.376681	up	0.476836	2.83405	2.45737	2.6711	3.58656	2.71742	2.14341	1.98359	2.77218	MIMAT0000791_st	10:62782779-62782800 (+)	22	AAGCUGCCAGUUGAAGAACUGU	rno-miR-22-3p	rno-miR-22-3p
106	20501355	rno-miR-23a-5p	MIMAT0004712	0.256444	up	0.557598	1.46515	1.2087	1.18736	2.14341	1.32859	0.771157	1.11016	1.48087	MIMAT0004712_st	19:25638788-25638809 (-)	22	GGGGUUCCUGGGGAUGGGAUUU	rno-miR-23a-5p	rno-miR-23a-5p
107	20501356	rno-miR-23a-3p	MIMAT0000792	0.0168903	up	0.656741	11.6658	11.6489	11.6339	11.7296	11.6339	11.6339	11.6789	11.6339	MIMAT0000792_st	19:25638753-25638773 (-)	21	AUCACAUUGCCAGGGAUUUCC	rno-miR-23a-3p	rno-miR-23a-3p
108	20501357	rno-miR-23b-5p	MIMAT0017099	-0.11838	down	0.599552	1.35056	1.46894	1.87293	1.42316	1.28598	1.25983	1.24792	1.3687	MIMAT0017099_st	17:7351744-7351764 (-)	21	GGGUUCCUGGCAUGCUGAUUU	rno-miR-23b-5p	rno-miR-23b-5p
109	20501358	rno-miR-23b-3p	MIMAT0000793	0.237196	up	0.263451	6.4518	6.21461	5.94973	6.29616	6.51269	6.57021	6.1814	6.48904	MIMAT0000793_st	17:7351707-7351727 (-)	21	AUCACAUUGCCAGGGAUUACC	rno-miR-23b-3p	rno-miR-23b-3p
110	20501359	rno-miR-24-1-5p	MIMAT0003153	0.115027	up	0.795139	3.42362	3.3086	3.22774	4.06101	3.64502	2.76112	3.05303	3.44874	MIMAT0003153_st	17:7351012-7351033 (-)	22	GUGCCUACUGAGCUGAUAUCAG	rno-miR-24-1-5p	rno-miR-24-1-5p
111	20501360	rno-miR-24-3p	MIMAT0000794	0.10977	up	0.57431	7.15983	7.05006	6.71646	7.06981	7.18706	7.12451	7.24664	7.28515	MIMAT0000794_st	17:7350974-7350995 (-) // 19:25638456-25638477 (-)	22	UGGCUCAGUUCAGCAGGAACAG	rno-miR-24-3p	rno-miR-24-3p
112	20501361	rno-miR-24-2-5p	MIMAT0005441	0.0483345	up	0.842172	1.7104	1.66207	1.51138	1.61491	1.64766	2.10946	1.82716	1.40684	MIMAT0005441_st	19:25638492-25638513 (-)	22	GUGCCUACUGAGCUGAAACAGU	rno-miR-24-2-5p	rno-miR-24-2-5p
113	20501362	rno-miR-25-5p	MIMAT0004713	-0.325566	down	0.0733928	8.86093	9.18649	8.97488	8.97488	9.37677	8.73916	9.20783	8.86873	MIMAT0004713_st	12:17608019-17608040 (-)	22	AGGCGGAGACACGGGCAAUUGC	rno-miR-25-5p	rno-miR-25-5p
114	20501363	rno-miR-25-3p	MIMAT0000795	0.119581	up	0.568288	1.20529	1.0857	0.981067	1.45384	0.988633	1.26649	1.28741	0.89552	MIMAT0000795_st	12:17607981-17608002 (-)	22	CAUUGCACUUGUCUCGGUCUGA	rno-miR-25-3p	rno-miR-25-3p
115	20501364	rno-miR-26a-5p	MIMAT0000796	0.156916	up	0.152084	0.872222	0.715306	0.697627	0.96696	0.5967	0.846468	0.851592	0.803238	MIMAT0000796_st	8:123981635-123981656 (+)	22	UUCAAGUAAUCCAGGAUAGGCU	rno-miR-26a-5p	rno-miR-26a-5p
116	20501365	rno-miR-26a-3p	MIMAT0017100	-0.388651	down	0.143148	1.33403	1.72268	1.48682	1.17037	1.56978	1.45936	2.11143	1.37235	MIMAT0017100_st	8:123981674-123981694 (+)	21	CCUAUUCUUGGUUACUUGCAC	rno-miR-26a-3p	rno-miR-26a-3p
117	20501366	rno-miR-26b-5p	MIMAT0000797	-0.216761	down	0.510512	1.53524	1.752	2.11543	1.27441	1.82716	1.4318	1.3134	1.8995	MIMAT0000797_st	9:73734076-73734096 (+)	21	UUCAAGUAAUUCAGGAUAGGU	rno-miR-26b-5p	rno-miR-26b-5p
118	20501367	rno-miR-26b-3p	MIMAT0004714	-0.0224631	down	0.939408	4.06677	4.08923	3.84279	4.3389	3.99203	3.64502	4.43289	4.21639	MIMAT0004714_st	9:73734112-73734133 (+)	22	CCUGUUCUCCAUUACUUGGCUC	rno-miR-26b-3p	rno-miR-26b-3p
119	20501368	rno-miR-27b-5p	MIMAT0017101	-0.195621	down	0.706225	3.6145	3.81012	4.23763	3.87966	3.98324	2.88146	3.20949	4.08238	MIMAT0017101_st	17:7351504-7351527 (-)	24	AGAGCUUAGCUGAUUGGUGAACAG	rno-miR-27b-5p	rno-miR-27b-5p
120	20501369	rno-miR-27b-3p	MIMAT0000798	-0.576593	down	0.648265	4.57591	5.15251	6.74946	5.17209	3.42534	3.24219	5.28272	5.31346	MIMAT0000798_st	17:7351465-7351485 (-)	21	UUCACAGUGGCUAAGUUCUGC	rno-miR-27b-3p	rno-miR-27b-3p
121	20501370	rno-miR-27a-5p	MIMAT0004715	-0.305544	down	0.247928	0.557887	0.863431	0.435268	0.546202	0.956417	0.5967	1.19861	0.53076	MIMAT0004715_st	19:25638630-25638651 (-)	22	AGGGCUUAGCUGCUUGUGAGCA	rno-miR-27a-5p	rno-miR-27a-5p
122	20501371	rno-miR-27a-3p	MIMAT0000799	-0.0275122	down	0.941421	4.14648	4.17399	4.25988	3.88954	3.5689	4.25988	4.6932	4.29003	MIMAT0000799_st	19:25638589-25638609 (-)	21	UUCACAGUGGCUAAGUUCCGC	rno-miR-27a-3p	rno-miR-27a-3p
123	20501372	rno-miR-28-5p	MIMAT0000800	0.311228	up	0.313778	5.26302	4.95179	5.16202	5.13539	4.89941	4.91316	4.79394	5.74049	MIMAT0000800_st	11:78139720-78139741 (-)	22	AAGGAGCUCACAGUCUAUUGAG	rno-miR-28-5p	rno-miR-28-5p
124	20501373	rno-miR-28-3p	MIMAT0004716	-0.209065	down	0.81375	1.46748	1.67655	2.45176	0.824057	1.00241	0.680985	1.57547	2.8974	MIMAT0004716_st	11:78139680-78139701 (-)	22	CACUAGAUUGUGAGCUCCUGGA	rno-miR-28-3p	rno-miR-28-3p
125	20501374	rno-miR-29b-2-5p	MIMAT0004717	0.00486147	up	0.987841	0.93259	0.927729	1.17201	1.33824	0.818125	0.4113	0.793053	1.04823	MIMAT0004717_st	13:110967530-110967551 (+)	22	CUGGUUUCACAUGGUGGCUUAG	rno-miR-29b-2-5p	rno-miR-29b-2-5p
126	20501375	rno-miR-29b-3p	MIMAT0000801	0.238127	up	0.495393	1.53366	1.29553	1.04608	1.8941	1.19286	1.02594	1.64766	1.68094	MIMAT0000801_st	13:110967571-110967593 (+) // 4:58108147-58108169 (-)	23	UAGCACCAUUUGAAAUCAGUGUU	rno-miR-29b-3p	rno-miR-29b-3p
127	20501376	rno-miR-29a-5p	MIMAT0004718	-0.216106	down	0.376145	1.07014	1.28625	1.3134	0.771157	1.02028	1.321	1.52508	1.11828	MIMAT0004718_st	4:58107811-58107832 (-)	22	ACUGAUUUCUUUUGGUGUUCAG	rno-miR-29a-5p	rno-miR-29a-5p
128	20501377	rno-miR-29a-3p	MIMAT0000802	-0.08984	down	0.505953	5.0867	5.17654	5.09342	4.88397	5.19582	5.09342	5.24039	5.28272	MIMAT0000802_st	4:58107773-58107794 (-)	22	UAGCACCAUCUGAAAUCGGUUA	rno-miR-29a-3p	rno-miR-29a-3p
129	20501378	rno-miR-29b-1-5p	MIMAT0005445	-0.179992	down	0.881735	4.99398	5.17397	5.81871	2.82483	5.00235	6.00914	4.70087	6.14797	MIMAT0005445_st	4:58108184-58108205 (-)	22	UUUCAUAUGGUGGUUUAGAUUU	rno-miR-29b-1-5p	rno-miR-29b-1-5p
130	20501379	rno-miR-29c-5p	MIMAT0003154	-0.205453	down	0.317265	0.739087	0.94454	0.5967	0.798043	1.10041	0.650752	1.13651	0.768468	MIMAT0003154_st	13:110968063-110968084 (+)	22	UGACCGAUUUCUCCUGGUGUUC	rno-miR-29c-5p	rno-miR-29c-5p
131	20501380	rno-miR-29c-3p	MIMAT0000803	0.100354	up	0.585112	2.67758	2.57723	2.54692	2.45176	2.78097	2.68358	2.40379	2.8974	MIMAT0000803_st	13:110968101-110968122 (+)	22	UAGCACCAUUUGAAAUCGGUUA	rno-miR-29c-3p	rno-miR-29c-3p
132	20501381	rno-miR-30c-5p	MIMAT0000804	0.106933	up	0.637353	0.793853	0.68692	0.4113	0.761168	1.01549	1.00535	0.633969	0.615038	MIMAT0000804_st	5:141362170-141362192 (-) // 9:22162643-22162665 (+)	23	UGUAAACAUCCUACACUCUCAGC	rno-miR-30c-5p	rno-miR-30c-5p
133	20501382	rno-miR-30c-1-3p	MIMAT0004719	-0.0832911	down	0.705244	1.08836	1.17165	1.3336	0.731312	1.00241	1.21277	1.17895	1.321	MIMAT0004719_st	5:141362132-141362153 (-)	22	CUGGGAGAGGGUUGUUUACUCC	rno-miR-30c-1-3p	rno-miR-30c-1-3p
134	20501383	rno-miR-30e-5p	MIMAT0000805	0.114953	up	0.388908	0.715212	0.600259	0.819307	0.717573	0.546202	0.655322	0.435268	0.77274	MIMAT0000805_st	5:141365169-141365190 (-)	22	UGUAAACAUCCUUGACUGGAAG	rno-miR-30e-5p	rno-miR-30e-5p
135	20501384	rno-miR-30e-3p	MIMAT0004720	-0.11025	down	0.416399	1.7198	1.83005	1.8209	1.92881	1.74045	1.66796	1.92881	1.56263	MIMAT0004720_st	5:141365127-141365148 (-)	22	CUUUCAGUCGGAUGUUUACAGC	rno-miR-30e-3p	rno-miR-30e-3p
136	20501385	rno-miR-30b-5p	MIMAT0000806	0.0967478	up	0.785726	1.40187	1.30512	1.73372	1.36149	1.49739	1.58934	0.684258	1.25478	MIMAT0000806_st	7:105815967-105815988 (-)	22	UGUAAACAUCCUACACUCAGCU	rno-miR-30b-5p	rno-miR-30b-5p
137	20501386	rno-miR-30b-3p	MIMAT0004721	0.257983	up	0.503411	3.69122	3.43324	3.87153	3.57433	3.54672	4.074	2.88146	3.42534	MIMAT0004721_st	7:105815929-105815950 (-)	22	CUGGGAUGUGGAUGUUUACGUC	rno-miR-30b-3p	rno-miR-30b-3p
138	20501387	rno-miR-30d-5p	MIMAT0000807	0.0833234	up	0.60861	0.922638	0.839315	0.601298	0.913327	0.969798	0.769213	0.946848	1.08538	MIMAT0000807_st	7:105819769-105819790 (-)	22	UGUAAACAUCCCCGACUGGAAG	rno-miR-30d-5p	rno-miR-30d-5p
139	20501388	rno-miR-30d-3p	MIMAT0004722	-0.0294668	down	0.786201	9.88993	9.9194	9.97053	10.0031	9.86959	9.69619	9.91808	9.97053	MIMAT0004722_st	7:105819729-105819750 (-)	22	CUUUCAGUCAGAUGUUUGCUGC	rno-miR-30d-3p	rno-miR-30d-3p
140	20501389	rno-miR-30a-5p	MIMAT0000808	-0.103297	down	0.440115	0.977781	1.08108	0.935314	0.924958	1.3134	1.01874	0.994525	0.989645	MIMAT0000808_st	9:22142894-22142915 (+)	22	UGUAAACAUCCUCGACUGGAAG	rno-miR-30a-5p	rno-miR-30a-5p
141	20501390	rno-miR-30a-3p	MIMAT0000809	-0.423587	down	0.604134	5.29586	5.71944	6.64443	4.23763	5.40945	6.27173	5.10445	5.37821	MIMAT0000809_st	9:22142935-22142956 (+)	22	CUUUCAGUCGGAUGUUUGCAGC	rno-miR-30a-3p	rno-miR-30a-3p
142	20501391	rno-miR-30c-2-3p	MIMAT0005442	0.161534	up	0.698475	6.85959	6.69806	7.08419	6.24971	6.53115	6.9197	6.47883	7.40936	MIMAT0005442_st	9:22162683-22162704 (+)	22	CUGGGAGAAGGCUGUUUACUCU	rno-miR-30c-2-3p	rno-miR-30c-2-3p
143	20501392	rno-miR-31a-5p	MIMAT0000810	-0.407743	down	0.515259	1.34931	1.75705	2.68358	1.15577	1.21521	0.89552	1.37235	1.99664	MIMAT0000810_st	5:108497706-108497727 (-)	22	AGGCAAGAUGCUGGCAUAGCUG	rno-miR-31a-5p	rno-miR-31a-5p
144	20501393	rno-miR-31a-3p	MIMAT0017102	-1.03891	down	0.297531	3.44812	4.48703	4.20976	3.47641	3.24219	2.8963	6.00914	3.97166	MIMAT0017102_st	5:108497669-108497691 (-)	23	UGCUAUGCCAACAUAUUGCCAUC	rno-miR-31a-3p	rno-miR-31a-3p
145	20501394	rno-miR-32-5p	MIMAT0000811	0.754943	up	0.247949	4.32931	3.57436	3.64502	3.38093	3.77507	5.25321	3.30301	4.35378	MIMAT0000811_st	5:74797869-74797890 (-)	22	UAUUGCACAUUACUAAGUUGCA	rno-miR-32-5p	rno-miR-32-5p
146	20501395	rno-miR-32-3p	MIMAT0017103	0.353514	up	0.0939597	3.36087	3.00736	3.01746	3.24219	3.05303	3.67544	2.95158	3.16499	MIMAT0017103_st	5:74797829-74797850 (-)	22	GCAAUUUAGUGUGUGUGAUAUU	rno-miR-32-3p	rno-miR-32-3p
147	20501396	rno-miR-33-5p	MIMAT0000812	-0.258258	down	0.391871	0.989496	1.24775	0.890288	1.38956	1.4318	0.74864	1.42118	0.830283	MIMAT0000812_st	7:120573224-120573244 (+)	21	GUGCAUUGUAGUUGCAUUGCA	rno-miR-33-5p	rno-miR-33-5p
148	20501397	rno-miR-33-3p	MIMAT0017104	-0.114773	down	0.592561	1.68182	1.79659	2.06815	1.55137	1.86226	1.83935	1.45936	1.65473	MIMAT0017104_st	7:120573264-120573284 (+)	21	CAAUGUUUCCACAGUGCAUCA	rno-miR-33-3p	rno-miR-33-3p
149	20501398	rno-miR-34b-5p	MIMAT0000813	0.000583327	up	0.997257	0.701428	0.700845	0.684258	0.615038	0.803238	0.9929	0.615038	0.496347	MIMAT0000813_st	8:54422618-54422640 (-)	23	AGGCAGUGUAAUUAGCUGAUUGU	rno-miR-34b-5p	rno-miR-34b-5p
150	20501399	rno-miR-34b-3p	MIMAT0017105	0.203862	up	0.275951	4.49641	4.29255	4.44626	4.53475	4.39387	4.31026	4.03753	4.64422	MIMAT0017105_st	8:54422582-54422603 (-)	22	AAUCACUAACUCCACUGCCAUC	rno-miR-34b-3p	rno-miR-34b-3p
151	20501400	rno-miR-34c-5p	MIMAT0000814	0.283945	up	0.372837	9.96865	9.6847	10.0031	9.52552	9.52552	10.0584	9.52552	10.3221	MIMAT0000814_st	8:54422094-54422116 (-)	23	AGGCAGUGUAGUUAGCUGAUUGC	rno-miR-34c-5p	rno-miR-34c-5p
152	20501401	rno-miR-34c-3p	MIMAT0004723	-0.132233	down	0.634269	8.0216	8.15383	8.37372	7.77238	8.23685	8.42618	7.85093	7.86624	MIMAT0004723_st	8:54422062-54422083 (-)	22	AAUCACUAACCACACAGCCAGG	rno-miR-34c-3p	rno-miR-34c-3p
153	20501402	rno-miR-34a-5p	MIMAT0000815	-0.221896	down	0.580307	1.23846	1.46036	2.13507	1.37235	0.903013	1.09511	1.34299	1.24792	MIMAT0000815_st	5:167187916-167187937 (+)	22	UGGCAGUGUCUUAGCUGGUUGU	rno-miR-34a-5p	rno-miR-34a-5p
154	20501403	rno-miR-34a-3p	MIMAT0017106	-0.166117	down	0.751836	3.91522	4.08134	4.2008	3.0317	3.84242	4.66222	4.2008	4.05175	MIMAT0017106_st	5:167187960-167187981 (+)	22	AAUCAGCAAGUAUACUGCCCUA	rno-miR-34a-3p	rno-miR-34a-3p
155	20501404	rno-miR-92a-1-5p	MIMAT0017107	-0.0595445	down	0.90405	1.17082	1.23036	0.743198	0.840192	1.80358	1.86226	1.14431	0.810012	MIMAT0017107_st	15:99854452-99854474 (+)	23	AGGUUGGGAUUUGUCGCAAUGCU	rno-miR-92a-1-5p	rno-miR-92a-1-5p
156	20501405	rno-miR-92a-3p	MIMAT0000816	0.299856	up	0.0239689	1.17501	0.875153	0.751492	1.11719	0.936503	1.11719	0.937465	1.29066	MIMAT0000816_st	15:99854489-99854509 (+) // X:139740819-139740839 (-)	21	UAUUGCACUUGUCCCGGCCUG	rno-miR-92a-3p	rno-miR-92a-3p
157	20501406	rno-miR-92a-2-5p	MIMAT0017108	-1.81809	down	0.39693	1.29901	3.1171	1.24425	0.858127	1.18736	1.29846	6.9197	1.74045	MIMAT0017108_st	X:139740857-139740878 (-)	22	AGGUGGGGAUUAGUGCCAUUAC	rno-miR-92a-2-5p	rno-miR-92a-2-5p
158	20501407	rno-miR-93-5p	MIMAT0000817	-0.0536143	down	0.347764	0.820597	0.874211	0.910848	0.890288	0.85132	0.840192	0.860467	0.731312	MIMAT0000817_st	12:17608223-17608245 (-)	23	CAAAGUGCUGUUCGUGCAGGUAG	rno-miR-93-5p	rno-miR-93-5p
159	20501408	rno-miR-93-3p	MIMAT0017109	-0.0464411	down	0.780807	0.75278	0.799221	1.02594	0.860467	0.846468	0.700247	0.525255	0.697627	MIMAT0017109_st	12:17608185-17608207 (-)	23	ACUGCUGAGCUAGCACUUCCCGA	rno-miR-93-3p	rno-miR-93-3p
160	20501409	rno-miR-96-5p	MIMAT0000818	0.00825717	up	0.987767	1.84578	1.83753	2.11543	1.13812	1.30502	2.6243	2.09213	1.77493	MIMAT0000818_st	4:57074951-57074973 (-)	23	UUUGGCACUAGCACAUUUUUGCU	rno-miR-96-5p	rno-miR-96-5p
161	20501410	rno-miR-96-3p	MIMAT0017110	-0.0126984	down	0.892992	0.983128	0.995827	1.07849	1.04608	0.847775	0.887815	1.06121	1.01549	MIMAT0017110_st	4:57074910-57074931 (-)	22	CAAUCAUGUGCAGUGCCAAUAU	rno-miR-96-3p	rno-miR-96-3p
162	20501411	rno-miR-98-5p	MIMAT0000819	-0.389579	down	0.137428	0.724014	1.11359	1.02028	1.11273	1.2394	0.449583	1.0811	0.60973	MIMAT0000819_st	X:41377561-41377582 (+)	22	UGAGGUAGUAAGUUGUAUUGUU	rno-miR-98-5p	rno-miR-98-5p
163	20501412	rno-miR-98-3p	MIMAT0017111	0.00955818	up	0.960823	1.10046	1.0909	1.19286	1.27441	0.85132	0.828367	1.22853	1.19861	MIMAT0017111_st	X:41377619-41377639 (+)	21	CUAUACAACUUACUACUUUCC	rno-miR-98-3p	rno-miR-98-3p
164	20501413	rno-miR-99a-5p	MIMAT0000820	-0.12862	down	0.264625	0.777914	0.906534	0.761168	0.798043	0.875017	0.717573	1.08342	0.818125	MIMAT0000820_st	11:16397556-16397577 (+)	22	AACCCGUAGAUCCGAUCUUGUG	rno-miR-99a-5p	rno-miR-99a-5p
165	20501414	rno-miR-99a-3p	MIMAT0004724	0.434744	up	0.180697	1.59157	1.15683	1.13651	1.71353	0.965267	1.12552	1.3687	1.93567	MIMAT0004724_st	11:16397593-16397614 (+)	22	CAAGCUCGUUUCUAUGGGUCUG	rno-miR-99a-3p	rno-miR-99a-3p
166	20501415	rno-miR-99b-5p	MIMAT0000821	-0.104942	down	0.542666	1.48897	1.59391	1.65473	1.3134	1.34299	1.56013	1.78403	1.59339	MIMAT0000821_st	1:56486975-56486996 (+)	22	CACCCGUAGAACCGACCUUGCG	rno-miR-99b-5p	rno-miR-99b-5p
167	20501416	rno-miR-99b-3p	MIMAT0004725	0.0334594	up	0.950197	1.6617	1.62825	1.61115	2.6613	1.55097	1.10445	1.72261	1.21937	MIMAT0004725_st	1:56487013-56487034 (+)	22	CAAGCUCGUGUCUGUGGGUCCG	rno-miR-99b-3p	rno-miR-99b-3p
168	20501417	rno-miR-100-5p	MIMAT0000822	0.133929	up	0.375232	7.88649	7.75256	7.62415	8.05197	7.89013	7.67782	7.74341	7.92968	MIMAT0000822_st	8:44518682-44518703 (+)	22	AACCCGUAGAUCCGAACUUGUG	rno-miR-100-5p	rno-miR-100-5p
169	20501418	rno-miR-100-3p	MIMAT0017112	0.0586498	up	0.881704	2.9875	2.92885	3.27538	2.6243	2.96425	2.74724	2.54692	3.59095	MIMAT0017112_st	8:44518717-44518735 (+)	19	CAAGCUUGUGUCUAUAGGU	rno-miR-100-3p	rno-miR-100-3p
170	20501419	rno-miR-101a-5p	MIMAT0004726	0.018883	up	0.784005	9.44701	9.42813	9.48213	9.48213	9.48213	9.37677	9.32012	9.48213	MIMAT0004726_st	5:121990629-121990650 (-)	22	UCAGUUAUCACAGUGCUGAUGC	rno-miR-101a-5p	rno-miR-101a-5p
171	20501420	rno-miR-101a-3p	MIMAT0000823	0.0133087	up	0.960426	6.11427	6.10096	6.34962	5.98344	6.1814	5.88053	5.77185	6.47883	MIMAT0000823_st	5:121990593-121990613 (-)	21	UACAGUACUGUGAUAACUGAA	rno-miR-101a-3p	rno-miR-101a-3p
172	20501421	rno-miR-103-2-5p	MIMAT0017113	0.143448	up	0.508664	8.38074	8.23729	8.33888	8.60919	8.18649	8.0008	8.18649	8.53223	MIMAT0017113_st	3:118996616-118996632 (+)	17	AGCUUCUUUACAGUGCU	rno-miR-103-2-5p	rno-miR-103-2-5p
173	20501422	rno-miR-103-3p	MIMAT0000824	0.161748	up	0.271876	5.79567	5.63392	5.70829	5.70829	5.56483	6.03306	5.62865	5.64567	MIMAT0000824_st	10:20695078-20695100 (+) // 3:118996653-118996675 (+)	23	AGCAGCAUUGUACAGGGCUAUGA	rno-miR-103-3p	rno-miR-103-3p
174	20501423	rno-miR-103-1-5p	MIMAT0017114	-0.284008	down	0.107512	4.45355	4.73755	4.53475	4.27661	4.79394	4.52623	4.88397	4.5578	MIMAT0017114_st	10:20695041-20695064 (+)	24	GGCUUCUUUACAGUGCUGCCUUGU	rno-miR-103-1-5p	rno-miR-103-1-5p
175	20501424	rno-miR-106b-5p	MIMAT0000825	0.209763	up	0.160201	6.31504	6.10527	6.24971	6.11986	6.03306	6.43014	6.03306	6.39511	MIMAT0000825_st	12:17608432-17608452 (-)	21	UAAAGUGCUGACAGUGCAGAU	rno-miR-106b-5p	rno-miR-106b-5p
176	20501425	rno-miR-106b-3p	MIMAT0004727	0.36097	up	0.247916	1.37195	1.01098	1.05166	1.87293	1.00241	1.27764	0.97887	0.965267	MIMAT0004727_st	12:17608391-17608412 (-)	22	CCGCACUGUGGGUACUUGCUGC	rno-miR-106b-3p	rno-miR-106b-3p
177	20501426	rno-miR-107-5p	MIMAT0017115	-0.0304333	down	0.468703	0.739803	0.770237	0.827052	0.724283	0.735995	0.78891	0.747663	0.706217	MIMAT0017115_st	1:238806884-238806907 (-)	24	AGCUUCUUUACAGUGUUGCCUUGU	rno-miR-107-5p	rno-miR-107-5p
178	20501427	rno-miR-107-3p	MIMAT0000826	0.928819	up	0.173881	3.56629	2.63747	3.74112	3.64502	2.0837	3.35323	2.0876	3.70063	MIMAT0000826_st	1:238806848-238806870 (-)	23	AGCAGCAUUGUACAGGGCUAUCA	rno-miR-107-3p	rno-miR-107-3p
179	20501428	rno-miR-122-5p	MIMAT0000827	0.191819	up	0.471029	6.81896	6.62714	6.874	6.47883	6.65781	6.85354	6.34962	7.12451	MIMAT0000827_st	18:61512761-61512782 (+)	22	UGGAGUGUGACAAUGGUGUUUG	rno-miR-122-5p	rno-miR-122-5p
180	20501429	rno-miR-122-3p	MIMAT0017116	0.120648	up	0.669912	1.25628	1.13563	1.18914	1.77493	1.05365	0.98647	1.1641	1.00744	MIMAT0017116_st	18:61512797-61512815 (+)	19	AACGCCAUCAUCACACUAA	rno-miR-122-3p	rno-miR-122-3p
181	20501430	rno-miR-124-5p	MIMAT0004728	-0.259004	down	0.418724	3.98114	4.24014	4.15361	4.13681	4.59516	3.54672	3.97166	4.25988	MIMAT0004728_st	15:43944549-43944570 (+) // 2:102699490-102699511 (+) // 3:170004585-170004606 (+)	22	CGUGUUCACAGCGGACCUUGAU	rno-miR-124-5p	rno-miR-124-5p
182	20501431	rno-miR-124-3p	MIMAT0000828	0.0955557	up	0.788069	5.62442	5.52886	5.56483	5.67339	5.31346	5.06155	5.70829	6.13831	MIMAT0000828_st	15:43944588-43944607 (+) // 2:102699527-102699546 (+) // 3:170004623-170004642 (+)	20	UAAGGCACGCGGUGAAUGCC	rno-miR-124-3p	rno-miR-124-3p
183	20501432	rno-miR-125a-5p	MIMAT0000829	0.224307	up	0.183301	1.09759	0.873279	0.78891	1.30502	0.910848	1.13812	0.92008	0.849623	MIMAT0000829_st	1:56487594-56487617 (+)	24	UCCCUGAGACCCUUUAACCUGUGA	rno-miR-125a-5p	rno-miR-125a-5p
184	20501433	rno-miR-125a-3p	MIMAT0004729	-0.122729	down	0.634109	0.969561	1.09229	1.3336	0.664998	0.897188	0.89379	1.04608	1.3499	MIMAT0004729_st	1:56487632-56487653 (+)	22	ACAGGUGAGGUUCUUGGGAGCC	rno-miR-125a-3p	rno-miR-125a-3p
185	20501434	rno-miR-125b-5p	MIMAT0000830	-0.0445563	down	0.86188	7.604	7.64856	7.74341	7.18706	7.62415	7.62415	7.57812	8.0008	MIMAT0000830_st	11:16443682-16443703 (+) // 8:44570169-44570190 (+)	22	UCCCUGAGACCCUAACUUGUGA	rno-miR-125b-5p	rno-miR-125b-5p
186	20501435	rno-miR-125b-1-3p	MIMAT0004730	-0.0195958	down	0.95179	6.53636	6.55595	6.09785	6.74946	6.85354	6.14314	6.71646	6.71646	MIMAT0004730_st	8:44570209-44570230 (+)	22	ACGGGUUAGGCUCUUGGGAGCU	rno-miR-125b-1-3p	rno-miR-125b-1-3p
187	20501436	rno-miR-125b-2-3p	MIMAT0026467	-0.233405	down	0.262457	8.16593	8.39933	8.47416	8.37372	8.42618	8.29766	8.29766	7.82641	MIMAT0026467_st	11:16443721-16443742 (+)	22	ACAAGUCAGGCUCUUGGGACCU	rno-miR-125b-2-3p	rno-miR-125b-2-3p
188	20501437	rno-miR-126a-5p	MIMAT0000831	-0.0341003	down	0.89773	4.5224	4.5565	4.11861	4.49495	4.82919	4.73334	4.72169	4.3389	MIMAT0000831_st	3:4768125-4768145 (+)	21	CAUUAUUACUUUUGGUACGCG	rno-miR-126a-5p	rno-miR-126a-5p
189	20501438	rno-miR-126a-3p	MIMAT0000832	-0.0455071	down	0.891503	4.17817	4.22367	4.5578	4.25125	3.71936	3.83699	4.39387	4.44626	MIMAT0000832_st	3:4768162-4768183 (+)	22	UCGUACCGUGAGUAAUAAUGCG	rno-miR-126a-3p	rno-miR-126a-3p
190	20501439	rno-miR-127-5p	MIMAT0017117	-0.0933442	down	0.701899	6.43872	6.53206	6.9197	6.55539	6.47883	6.48904	6.19765	6.27173	MIMAT0017117_st	6:134184334-134184356 (+)	23	CUGAAGCUCAGAGGGCUCUGAUU	rno-miR-127-5p	rno-miR-127-5p
191	20501440	rno-miR-127-3p	MIMAT0000833	0.0770535	up	0.904225	3.88978	3.81272	2.92017	4.22923	4.53475	4.29003	3.98324	3.15007	MIMAT0000833_st	6:134184368-134184389 (+)	22	UCGGAUCCGUCUGAGCUUGGCU	rno-miR-127-3p	rno-miR-127-3p
192	20501441	rno-miR-128-1-5p	MIMAT0017118	-0.350934	down	0.60649	2.57925	2.93018	3.75696	3.40271	2.11341	2.21105	2.92017	2.12397	MIMAT0017118_st	13:40907589-40907609 (+)	21	CGGGGCCGUAGCACUGUCUGA	rno-miR-128-1-5p	rno-miR-128-1-5p
193	20501442	rno-miR-128-3p	MIMAT0000834	0.180287	up	0.406196	1.26267	1.08239	0.94338	1.01756	1.33398	1.52896	0.969798	1.2415	MIMAT0000834_st	13:40907624-40907644 (+) // 8:116727249-116727269 (-)	21	UCACAGUGAACCGGUCUCUUU	rno-miR-128-3p	rno-miR-128-3p
194	20501443	rno-miR-128-2-5p	MIMAT0017119	-0.0630556	down	0.861559	5.8343	5.89735	5.44368	6.23443	6.36784	5.74049	5.88053	5.52797	MIMAT0017119_st	8:116727286-116727306 (-)	21	GGGGGCCGAUGCACUGUAAGA	rno-miR-128-2-5p	rno-miR-128-2-5p
195	20501444	rno-miR-129-1-3p	MIMAT0017120	-0.36094	down	0.103918	1.25018	1.61112	1.77493	1.4318	1.37235	1.29846	1.68607	1.02028	MIMAT0017120_st	4:55892210-55892228 (+)	19	AAGCCCUUACCCCAAAAAG	rno-miR-129-1-3p	rno-miR-129-1-3p
196	20501445	rno-miR-130a-5p	MIMAT0017121	-0.189556	down	0.554556	1.09055	1.28011	1.11719	1.53385	1.60071	0.680985	1.12244	1.05683	MIMAT0017121_st	3:67949646-67949667 (-)	22	GCUCUUUUCACAUUGUGCUACU	rno-miR-130a-5p	rno-miR-130a-5p
197	20501446	rno-miR-130a-3p	MIMAT0000836	-0.0614651	down	0.885349	1.83131	1.89277	1.58647	2.37762	2.42703	1.3561	1.66482	1.76021	MIMAT0000836_st	3:67949606-67949627 (-)	22	CAGUGCAAUGUUAAAAGGGCAU	rno-miR-130a-3p	rno-miR-130a-3p
198	20501447	rno-miR-130b-5p	MIMAT0017122	0.346318	up	0.0895892	2.34827	2.00195	1.92881	2.37762	2.2756	2.44071	1.80144	2.22647	MIMAT0017122_st	11:85885607-85885628 (+)	22	ACUCUUUCCCUGUUGCACUACU	rno-miR-130b-5p	rno-miR-130b-5p
199	20501448	rno-miR-130b-3p	MIMAT0000837	-0.00102617	down	0.990724	12.8056	12.8066	12.7316	12.9536	12.8442	12.7316	12.8442	12.7316	MIMAT0000837_st	11:85885645-85885666 (+)	22	CAGUGCAAUGAUGAAAGGGCAU	rno-miR-130b-3p	rno-miR-130b-3p
200	20501449	rno-miR-132-5p	MIMAT0017123	-0.00567666	down	0.961536	0.823222	0.828898	0.6464	0.77274	0.830283	0.890288	1.01001	0.806637	MIMAT0017123_st	10:62480749-62480770 (+)	22	ACCGUGGCUUUCGAUUGUUACU	rno-miR-132-5p	rno-miR-132-5p
201	20501450	rno-miR-132-3p	MIMAT0000838	0	down	1	13.2441	13.2441	13.2441	13.2441	13.2441	13.2441	13.2441	13.2441	MIMAT0000838_st	10:62480785-62480806 (+)	22	UAACAGUCUACAGCCAUGGUCG	rno-miR-132-3p	rno-miR-132-3p
202	20501451	rno-miR-133a-5p	MIMAT0017124	0.0112967	up	0.922296	11.724	11.7127	11.7296	11.8588	11.6789	11.8016	11.7296	11.5116	MIMAT0017124_st	18:2189267-2189288 (-)	22	AGCUGGUAAAAUGGAACCAAAU	rno-miR-133a-5p	rno-miR-133a-5p
203	20501452	rno-miR-133a-3p	MIMAT0000839	-0.0614651	down	0.885349	1.83131	1.89277	1.58647	2.37762	2.42703	1.3561	1.66482	1.76021	MIMAT0000839_st	18:2189230-2189251 (-)	22	UUUGGUCCCCUUCAACCAGCUG	rno-miR-133a-3p	rno-miR-133a-3p
204	20501453	rno-miR-134-5p	MIMAT0000840	-0.13735	down	0.152061	10.8996	11.0369	10.9296	10.8001	11.1316	10.9691	11.0496	10.9296	MIMAT0000840_st	6:134415639-134415660 (+)	22	UGUGACUGGUUGACCAGAGGGG	rno-miR-134-5p	rno-miR-134-5p
205	20501454	rno-miR-134-3p	MIMAT0017125	0.220127	up	0.304416	1.08411	0.863984	0.615038	0.89552	0.92008	1.34299	1.05683	1.01383	MIMAT0017125_st	6:134415678-134415699 (+)	22	CUGUGGGCCACCUAGUCACCAA	rno-miR-134-3p	rno-miR-134-3p
206	20501455	rno-miR-135a-5p	MIMAT0000841	-0.0386238	down	0.949662	4.03038	4.069	5.14357	3.91295	3.40271	4.40312	3.66073	3.77507	MIMAT0000841_st	7:29077714-29077736 (-)	23	UAUGGCUUUUUAUUCCUAUGUGA	rno-miR-135a-5p	rno-miR-135a-5p
207	20501456	rno-miR-135a-3p	MIMAT0004732	0.410624	up	0.390107	2.00805	1.59742	1.23447	2.47818	1.54271	1.29846	2.01508	2.2475	MIMAT0004732_st	7:29077676-29077697 (-)	22	UGUAGGGAUGGAAGCCAUGAAA	rno-miR-135a-3p	rno-miR-135a-3p
208	20501457	rno-miR-136-5p	MIMAT0000842	0.0011096	up	0.998422	3.66098	3.65987	3.24219	2.8963	3.36255	3.94983	4.37488	4.13681	MIMAT0000842_st	6:134186991-134187013 (+)	23	ACUCCAUUUGUUUUGAUGAUGGA	rno-miR-136-5p	rno-miR-136-5p
209	20501458	rno-miR-136-3p	MIMAT0004733	-0.007216	down	0.97615	9.31358	9.32079	9.37677	8.86873	9.32012	9.48213	9.26549	9.58987	MIMAT0004733_st	6:134187025-134187046 (+)	22	CAUCAUCGUCUCAAAUGAGUCU	rno-miR-136-3p	rno-miR-136-3p
210	20501459	rno-miR-137-5p	MIMAT0017126	-0.295647	down	0.513853	2.3988	2.69445	2.22647	2.06815	3.26883	2.95158	2.58804	2.17667	MIMAT0017126_st	2:214802318-214802339 (+)	22	ACGGGUAUUCUUGGGUGGAUAA	rno-miR-137-5p	rno-miR-137-5p
211	20501460	rno-miR-137-3p	MIMAT0000843	-0.188758	down	0.212594	0.844679	1.03344	1.07349	0.706217	0.975165	0.735995	1.05166	1.09183	MIMAT0000843_st	2:214802354-214802376 (+)	23	UUAUUGCUUAAGAAUACGCGUAG	rno-miR-137-3p	rno-miR-137-3p
212	20501461	rno-miR-138-5p	MIMAT0000844	0.115269	up	0.333047	0.861946	0.746677	0.678267	0.671237	0.747663	0.924958	0.814102	0.989645	MIMAT0000844_st	19:11114711-11114733 (-) // 8:127390300-127390322 (+)	23	AGCUGGUGUUGUGAAUCAGGCCG	rno-miR-138-5p	rno-miR-138-5p
213	20501462	rno-miR-138-2-3p	MIMAT0017127	-0.411787	down	0.503169	5.99435	6.40614	5.97016	6.46123	6.69286	6.55539	6.55539	4.96644	MIMAT0017127_st	19:11114666-11114686 (-)	21	GCUAUUUCACGACACCAGGGU	rno-miR-138-2-3p	rno-miR-138-2-3p
214	20501463	rno-miR-138-1-3p	MIMAT0004734	-0.182406	down	0.172941	0.989753	1.17216	1.29522	0.953792	1.21937	0.897188	1.00189	1.11828	MIMAT0004734_st	8:127390338-127390359 (+)	22	CGGCUACUUCACAACACCAGGG	rno-miR-138-1-3p	rno-miR-138-1-3p
215	20501464	rno-miR-139-5p	MIMAT0000845	0.128557	up	0.701951	3.89713	3.76857	3.25233	3.62254	4.21639	4.06101	3.83699	4.00784	MIMAT0000845_st	1:158976582-158976603 (+)	22	UCUACAGUGCACGUGUCUCCAG	rno-miR-139-5p	rno-miR-139-5p
216	20501465	rno-miR-139-3p	MIMAT0004735	0.0737518	up	0.719353	10.6879	10.6142	10.6508	10.4201	10.5408	10.5941	10.6508	11.0496	MIMAT0004735_st	1:158976618-158976639 (+)	22	UGGAGACGCGGCCCUGUUGGAG	rno-miR-139-3p	rno-miR-139-3p
217	20501466	rno-miR-141-5p	MIMAT0017128	0.270602	up	0.262984	0.92662	0.656018	0.478792	0.578455	0.693108	0.988633	0.796155	1.21277	MIMAT0017128_st	4:160840963-160840984 (-)	22	UCCAUCUUCCAGUGCAGUGUUG	rno-miR-141-5p	rno-miR-141-5p
218	20501467	rno-miR-141-3p	MIMAT0000846	-0.13992	down	0.499406	0.746062	0.885982	1.00189	0.4113	0.728395	0.965267	0.927662	0.86162	MIMAT0000846_st	4:160840919-160840940 (-)	22	UAACACUGUCUGGUAAAGAUGG	rno-miR-141-3p	rno-miR-141-3p
219	20501468	rno-miR-142-5p	MIMAT0000847	0.123377	up	0.379981	0.793466	0.670089	0.903013	0.834985	0.610907	0.731312	0.496347	0.814102	MIMAT0000847_st	10:76049295-76049315 (+)	21	CAUAAAGUAGAAAGCACUACU	rno-miR-142-5p	rno-miR-142-5p
220	20501469	rno-miR-142-3p	MIMAT0000848	0.186885	up	0.490424	6.56331	6.37642	6.62312	6.13831	6.23443	6.74946	6.27173	6.80215	MIMAT0000848_st	10:76049331-76049353 (+)	23	UGUAGUGUUUCCUACUUUAUGGA	rno-miR-142-3p	rno-miR-142-3p
221	20501470	rno-miR-143-5p	MIMAT0017129	-0.242659	down	0.197193	3.89617	4.13883	4.29003	3.78463	4.00784	3.74112	4.11861	4.16275	MIMAT0017129_st	18:57625172-57625192 (-)	21	GGUGCAGUGCUGCAUCUCUGG	rno-miR-143-5p	rno-miR-143-5p
222	20501471	rno-miR-143-3p	MIMAT0000849	0.549916	up	0.100232	2.30404	1.75413	1.66796	2.64425	1.68094	1.82716	1.91348	2.44071	MIMAT0000849_st	18:57625137-57625158 (-)	22	UGAGAUGAAGCACUGUAGCUCA	rno-miR-143-3p	rno-miR-143-3p
223	20501472	rno-miR-144-5p	MIMAT0017130	-0.333192	down	0.118992	1.01422	1.34741	1.31715	1.17461	1.12244	1.02028	1.60266	0.847775	MIMAT0017130_st	10:64129358-64129380 (+)	23	GGAUAUCAUCAUAUACUGUAAGU	rno-miR-144-5p	rno-miR-144-5p
224	20501473	rno-miR-144-3p	MIMAT0000850	-0.338239	down	0.370853	5.46599	5.80423	5.60596	5.1147	6.32426	5.83958	5.48246	5.44368	MIMAT0000850_st	10:64129395-64129414 (+)	20	UACAGUAUAGAUGAUGUACU	rno-miR-144-3p	rno-miR-144-3p
225	20501474	rno-miR-145-5p	MIMAT0000851	0.102019	up	0.758967	9.96565	9.86363	10.0584	9.58987	9.69619	9.76627	9.83634	10.5408	MIMAT0000851_st	18:57623797-57623819 (-)	23	GUCCAGUUUUCCCAGGAAUCCCU	rno-miR-145-5p	rno-miR-145-5p
226	20501475	rno-miR-145-3p	MIMAT0017131	0.29784	up	0.453195	4.25541	3.95757	3.30301	4.18994	4.43289	4.08858	4.13681	4.48771	MIMAT0017131_st	18:57623761-57623781 (-)	21	GGAUUCCUGGAAAUACUGUUC	rno-miR-145-3p	rno-miR-145-3p
227	20501476	rno-miR-146a-5p	MIMAT0000852	-0.210053	down	0.461065	10.8507	11.0608	10.9691	11.1316	10.9691	11.0496	11.2442	10.371	MIMAT0000852_st	10:28476425-28476446 (-)	22	UGAGAACUGAAUUCCAUGGGUU	rno-miR-146a-5p	rno-miR-146a-5p
228	20501477	rno-miR-146a-3p	MIMAT0017132	0.209244	up	0.657185	1.8688	1.65956	2.0837	1.82716	1.70761	1.28179	1.18736	2.49744	MIMAT0017132_st	10:28476391-28476411 (-)	21	ACCUGUGAAGUUCAGUUCUUU	rno-miR-146a-3p	rno-miR-146a-3p
229	20501478	rno-miR-150-5p	MIMAT0000853	-0.0936918	down	0.723228	6.69058	6.78427	6.65781	7.03516	6.874	6.80215	6.82101	6.23443	MIMAT0000853_st	1:95596092-95596113 (+)	22	UCUCCCAACCCUUGUACCAGUG	rno-miR-150-5p	rno-miR-150-5p
230	20501479	rno-miR-150-3p	MIMAT0017133	-0.137655	down	0.430327	6.29994	6.43759	6.55539	6.57021	6.46123	6.20974	6.29616	6.11986	MIMAT0017133_st	1:95596128-95596146 (+)	19	CUGGUACAGGCCUGGGGGA	rno-miR-150-3p	rno-miR-150-3p
231	20501480	rno-miR-152-5p	MIMAT0017134	0.336132	up	0.380518	3.00667	2.67053	2.09213	2.96425	2.92938	3.33833	2.9901	2.71742	MIMAT0017134_st	10:85608259-85608281 (+)	23	AGGUUCUGUGAUACACUCCGACU	rno-miR-152-5p	rno-miR-152-5p
232	20501481	rno-miR-152-3p	MIMAT0000854	-0.28035	down	0.380917	4.28338	4.56373	4.18994	4.37488	5.1147	4.23763	4.38654	4.23763	MIMAT0000854_st	10:85608297-85608317 (+)	21	UCAGUGCAUGACAGAACUUGG	rno-miR-152-3p	rno-miR-152-3p
233	20501482	rno-miR-153-5p	MIMAT0017135	-0.123662	down	0.305787	9.76627	9.88993	9.69619	9.69619	9.97053	9.83634	10.0031	9.76627	MIMAT0017135_st	6:144521050-144521072 (+)	23	GUCAUUUUUGUGAUGUUGCAGCU	rno-miR-153-5p	rno-miR-153-5p
234	20501483	rno-miR-153-3p	MIMAT0000855	-0.534171	down	0.324075	3.18118	3.71535	3.38093	3.98763	3.8756	3.10415	3.88954	2.45176	MIMAT0000855_st	6:144521089-144521110 (+)	22	UUGCAUAGUCACAAAAGUGAUC	rno-miR-153-3p	rno-miR-153-3p
235	20501484	rno-miR-154-5p	MIMAT0000856	-0.152381	down	0.222214	7.93271	8.08509	7.89013	7.89013	8.12828	7.92968	8.23685	7.97831	MIMAT0000856_st	6:134419685-134419706 (+)	22	UAGGUUAUCCGUGUUGCCUUCG	rno-miR-154-5p	rno-miR-154-5p
236	20501485	rno-miR-154-3p	MIMAT0017136	0.149291	up	0.672777	1.25648	1.10719	1.17201	1.71074	1.48087	1.04608	0.668678	1.0126	MIMAT0017136_st	6:134419721-134419742 (+)	22	AAUCAUACACGGUUGACCUAUU	rno-miR-154-3p	rno-miR-154-3p
237	20501486	rno-miR-181c-5p	MIMAT0000857	-0.21756	down	0.466299	8.82437	9.04193	9.07545	8.33888	8.97488	8.86873	9.07545	9.26549	MIMAT0000857_st	19:25667407-25667428 (+)	22	AACAUUCAACCUGUCGGUGAGU	rno-miR-181c-5p	rno-miR-181c-5p
238	20501487	rno-miR-181c-3p	MIMAT0017137	-0.0790023	down	0.725748	0.803956	0.882958	0.700247	0.816027	1.2394	0.606197	0.70923	0.989645	MIMAT0017137_st	19:25667446-25667467 (+)	22	ACCAUCGACCGUUGAGUGGACC	rno-miR-181c-3p	rno-miR-181c-3p
239	20501488	rno-miR-181a-5p	MIMAT0000858	-0.601774	down	0.200725	5.10208	5.70385	5.48246	5.51161	5.98344	5.41975	5.64567	4.37488	MIMAT0000858_st	13:51132531-51132553 (+) // 3:18650942-18650964 (+)	23	AACAUUCAACGCUGUCGGUGAGU	rno-miR-181a-5p	rno-miR-181a-5p
240	20501489	rno-miR-181a-2-3p	MIMAT0017138	-0.367413	down	0.358488	6.25677	6.62419	6.53115	5.56483	6.74946	6.53115	6.59194	6.67434	MIMAT0017138_st	3:18650987-18651005 (+)	19	ACCACCAACCGUUGACUGU	rno-miR-181a-2-3p	rno-miR-181a-2-3p
241	20501490	rno-miR-181b-5p	MIMAT0000859	-0.0834033	down	0.476609	8.34558	8.42899	8.60919	8.23685	8.33888	8.37372	8.33888	8.42618	MIMAT0000859_st	13:51132713-51132735 (+) // 3:18652021-18652043 (+)	23	AACAUUCAUUGCUGUCGGUGGGU	rno-miR-181b-5p	rno-miR-181b-5p
242	20501491	rno-miR-181b-1-3p	MIMAT0017139	-0.0560325	down	0.807477	7.89569	7.95172	7.69489	7.67782	8.08013	7.77238	8.08013	8.23685	MIMAT0017139_st	13:51132753-51132773 (+)	21	CUCACUGAACAAUGAAUGCAA	rno-miR-181b-1-3p	rno-miR-181b-1-3p
243	20501492	rno-miR-181b-2-3p	MIMAT0017140	-0.41382	down	0.189131	3.03704	3.45086	3.71936	3.28088	3.315	2.58804	3.31822	3.24219	MIMAT0017140_st	3:18652059-18652080 (+)	22	CUCACUGGUCAAUGAAUGCAAA	rno-miR-181b-2-3p	rno-miR-181b-2-3p
244	20501493	rno-miR-183-5p	MIMAT0000860	0.441062	up	0.161275	5.401	4.95994	5.22389	5.32671	4.65358	5.10445	5.00235	5.77185	MIMAT0000860_st	4:57075156-57075177 (-)	22	UAUGGCACUGGUAGAAUUCACU	rno-miR-183-5p	rno-miR-183-5p
245	20501494	rno-miR-183-3p	MIMAT0017141	-0.144273	down	0.532137	4.05518	4.19945	4.05175	4.42535	4.31739	3.98324	4.22923	3.75696	MIMAT0017141_st	4:57075117-57075137 (-)	21	UGAAUUACCGAAGGGCCAUAA	rno-miR-183-3p	rno-miR-183-3p
246	20501495	rno-miR-184	MIMAT0000861	0.298988	up	0.301293	1.66374	1.36476	1.4318	1.27441	1.38956	2.12343	1.27291	1.59339	MIMAT0000861_st	8:94692582-94692603 (-)	22	UGGACGGAGAACUGAUAAGGGU	rno-miR-184	rno-miR-184
247	20501496	rno-miR-185-5p	MIMAT0000862	-0.441731	down	0.739706	6.03215	6.47388	4.31739	7.24664	7.40936	5.41975	7.69489	5.43005	MIMAT0000862_st	11:84658798-84658819 (+)	22	UGGAGAGAAAGGCAGUUCCUGA	rno-miR-185-5p	rno-miR-185-5p
248	20501497	rno-miR-185-3p	MIMAT0017142	-0.308204	down	0.786229	6.11991	6.42811	4.59516	6.9825	7.08419	5.19582	7.60498	6.1814	MIMAT0017142_st	11:84658842-84658860 (+)	19	UUUCCUCUGGUCCUUCUCU	rno-miR-185-3p	rno-miR-185-3p
249	20501498	rno-miR-186-5p	MIMAT0000863	0.150847	up	0.606812	4.97354	4.82269	4.302	4.93221	5.13539	4.88397	5.03069	5.10445	MIMAT0000863_st	2:255655029-255655050 (+)	22	CAAAGAAUUCUCCUUUUGGGCU	rno-miR-186-5p	rno-miR-186-5p
250	20501499	rno-miR-186-3p	MIMAT0017143	0.0652515	up	0.771978	10.2416	10.1763	10.1485	10.2125	10.0584	9.91808	10.3221	10.5941	MIMAT0017143_st	2:255655068-255655088 (+)	21	GCCCAAAGGUGAAUUUUUUGG	rno-miR-186-3p	rno-miR-186-3p
251	20501500	rno-miR-187-5p	MIMAT0017144	-0.285362	down	0.601774	7.19351	7.47888	7.54272	7.85859	7.51222	7.51222	7.38169	6.20974	MIMAT0017144_st	18:16219634-16219651 (-)	18	AGGCUACAACACAGGACC	rno-miR-187-5p	rno-miR-187-5p
252	20501501	rno-miR-187-3p	MIMAT0000864	0.210856	up	0.413624	1.14282	0.931968	0.840192	1.55137	1.13122	1.01298	0.824492	0.864118	MIMAT0000864_st	18:16219593-16219614 (-)	22	UCGUGUCUUGUGUUGCAGCCGG	rno-miR-187-3p	rno-miR-187-3p
253	20501502	rno-miR-190a-5p	MIMAT0000865	0.437359	up	0.438642	4.9426	4.50524	3.87966	4.77544	5.48246	4.88027	4.15361	5.17209	MIMAT0000865_st	8:71549072-71549093 (-)	22	UGAUAUGUUUGAUAUAUUAGGU	rno-miR-190a-5p	rno-miR-190a-5p
254	20501503	rno-miR-190a-3p	MIMAT0017145	0.137546	up	0.533347	1.53849	1.40094	1.5615	1.69263	1.40684	1.74045	1.23447	1.18238	MIMAT0017145_st	8:71549036-71549057 (-)	22	ACUAUAUAUCAAGCAUAUUCCU	rno-miR-190a-3p	rno-miR-190a-3p
255	20501504	rno-miR-191a-5p	MIMAT0000866	-0.00496717	down	0.959617	10.2969	10.3019	10.371	10.1485	10.3221	10.3221	10.2125	10.4201	MIMAT0000866_st	8:113614374-113614396 (+)	23	CAACGGAAUCCCAAAAGCAGCUG	rno-miR-191a-5p	rno-miR-191a-5p
256	20501505	rno-miR-191a-3p	MIMAT0017146	0.0814175	up	0.554889	4.94845	4.86703	4.73334	5.09342	4.98749	4.74959	4.88027	5.00235	MIMAT0017146_st	8:113614416-113614437 (+)	22	GCUGCACUUGGAUUUCGUUCCC	rno-miR-191a-3p	rno-miR-191a-3p
257	20501506	rno-miR-192-5p	MIMAT0000867	0.163566	up	0.138668	3.96769	3.80412	3.66073	4.05175	3.90269	3.97166	3.84895	3.87966	MIMAT0000867_st	1:209040279-209040299 (+)	21	CUGACCUAUGAAUUGACAGCC	rno-miR-192-5p	rno-miR-192-5p
258	20501507	rno-miR-192-3p	MIMAT0017147	0.305205	up	0.269417	5.53383	5.22863	5.43005	5.45872	4.96644	5.24039	5.28939	5.90238	MIMAT0017147_st	1:209040322-209040343 (+)	22	CUGCCAGUUCCAUAGGUCACAG	rno-miR-192-3p	rno-miR-192-3p
259	20501508	rno-miR-193-5p	MIMAT0004736	0.0609067	up	0.755779	11.8625	11.8016	11.8016	11.6339	11.8016	11.7296	11.8016	12.224	MIMAT0004736_st	10:65901067-65901088 (+)	22	UGGGUCUUUGCGGGCAAGAUGA	rno-miR-193-5p	rno-miR-193-5p
260	20501509	rno-miR-193-3p	MIMAT0000868	0.141444	up	0.37709	0.684541	0.543097	0.46169	0.449583	0.51228	0.899118	0.655322	0.704922	MIMAT0000868_st	10:65901101-65901122 (+)	22	AACUGGCCUACAAAGUCCCAGU	rno-miR-193-3p	rno-miR-193-3p
261	20501510	rno-miR-194-5p	MIMAT0000869	-0.33071	down	0.0793526	7.6045	7.93521	7.85093	7.46528	7.82641	7.80549	8.12828	7.54272	MIMAT0000869_st	1:209040085-209040106 (+) // 13:101312461-101312482 (+)	22	UGUAACAGCAACUCCAUGUGGA	rno-miR-194-5p	rno-miR-194-5p
262	20501511	rno-miR-194-3p	MIMAT0017148	0.664572	up	0.141638	1.67406	1.00949	1.20268	1.52896	0.796155	1.1641	1.02962	2.32912	MIMAT0017148_st	1:209040121-209040141 (+)	21	CCAGUGGGGCUGCUGUUAUCU	rno-miR-194-3p	rno-miR-194-3p
263	20501512	rno-miR-195-5p	MIMAT0000870	-0.0154787	down	0.904746	11.407	11.4225	11.2442	11.2442	11.5116	11.5116	11.5116	11.4652	MIMAT0000870_st	10:57074184-57074204 (+)	21	UAGCAGCACAGAAAUAUUGGC	rno-miR-195-5p	rno-miR-195-5p
264	20501513	rno-miR-195-3p	MIMAT0017149	-0.0565353	down	0.68172	0.765804	0.822339	0.781392	0.779005	1.05166	0.824057	0.633969	0.69435	MIMAT0017149_st	10:57074222-57074244 (+)	23	CCAAUAUUGGCUGUGCUGCUCCA	rno-miR-195-3p	rno-miR-195-3p
265	20501514	rno-miR-196a-5p	MIMAT0000871	-0.259147	down	0.617076	2.56827	2.82742	1.91348	2.37762	3.10415	2.70289	3.46461	2.6243	MIMAT0000871_st	7:141736783-141736804 (+)	22	UAGGUAGUUUCAUGUUGUUGGG	rno-miR-196a-5p	rno-miR-196a-5p
266	20501515	rno-miR-196a-3p	MIMAT0004737	0.0126784	up	0.832358	0.951123	0.938445	0.858127	1.00189	0.94338	0.963665	1.01383	0.887815	MIMAT0004737_st	7:141736819-141736840 (+)	22	UCGGCAACAAGAAACUGCCUGA	rno-miR-196a-3p	rno-miR-196a-3p
267	20501516	rno-miR-199a-5p	MIMAT0000872	0.190621	up	0.399101	6.11768	5.92706	5.74049	6.36784	6.13831	6.1814	5.90238	5.80381	MIMAT0000872_st	13:77910797-77910819 (+)	23	CCCAGUGUUCAGACUACCUGUUC	rno-miR-199a-5p	rno-miR-199a-5p
268	20501517	rno-miR-199a-3p	MIMAT0004738	0.116001	up	0.285181	12.8431	12.7271	12.8442	12.7316	12.6056	12.8442	12.7316	12.9536	MIMAT0004738_st	13:77910836-77910857 (+)	22	ACAGUAGUCUGCACAUUGGUUA	rno-miR-199a-3p	rno-miR-199a-3p
269	20501518	rno-miR-200c-5p	MIMAT0017150	0.0828106	up	0.0887268	6.5014	6.41859	6.38337	6.51269	6.38337	6.47883	6.48904	6.51269	MIMAT0017150_st	4:160841388-160841408 (-)	21	CGUCUUACCCAGCAGUGUUUG	rno-miR-200c-5p	rno-miR-200c-5p
270	20501519	rno-miR-200c-3p	MIMAT0000873	-0.102166	down	0.389958	0.755	0.857166	0.935314	0.608944	0.761168	0.728395	0.875017	0.927662	MIMAT0000873_st	4:160841348-160841368 (-)	21	UAAUACUGCCGGGUAAUGAUG	rno-miR-200c-3p	rno-miR-200c-3p
271	20501520	rno-miR-200a-5p	MIMAT0017151	-0.363085	down	0.10516	9.24627	9.60936	9.32012	9.26549	9.91808	9.26549	9.58987	9.20783	MIMAT0017151_st	5:172898273-172898293 (-)	21	CAUCUUACCGGACAGUGCUGG	rno-miR-200a-5p	rno-miR-200a-5p
272	20501521	rno-miR-200a-3p	MIMAT0000874	0.0124688	up	0.969798	2.09396	2.08149	2.41335	2.2756	2.33713	1.95442	1.49401	2.05187	MIMAT0000874_st	5:172898234-172898255 (-)	22	UAACACUGUCUGGUAACGAUGU	rno-miR-200a-3p	rno-miR-200a-3p
273	20501522	rno-miR-200b-5p	MIMAT0017152	-0.387534	down	0.310073	2.95574	3.34327	3.05303	2.44071	3.22774	3.15007	3.74904	3.27642	MIMAT0017152_st	5:172899051-172899072 (-)	22	CAUCUUACUGGGCAGCAUUGGA	rno-miR-200b-5p	rno-miR-200b-5p
274	20501523	rno-miR-200b-3p	MIMAT0000875	0.0514233	up	0.935709	3.41002	3.3586	2.47818	4.2008	3.74112	3.16499	3.85649	2.86428	MIMAT0000875_st	5:172899014-172899036 (-)	23	UAAUACUGCCUGGUAAUGAUGAC	rno-miR-200b-3p	rno-miR-200b-3p
275	20501524	rno-miR-203a-5p	MIMAT0017153	0.523705	up	0.255337	6.48211	5.95841	5.90238	6.70466	5.51161	5.92066	6.46123	6.82101	MIMAT0017153_st	6:136932102-136932122 (+)	21	AGUGGUUCUUAACAGUUCAAC	rno-miR-203a-5p	rno-miR-203a-5p
276	20501525	rno-miR-203a-3p	MIMAT0000876	0.253619	up	0.141786	1.5728	1.31918	1.2415	1.66796	1.22204	1.69263	1.49401	1.35781	MIMAT0000876_st	6:136932140-136932161 (+)	22	GUGAAAUGUUUAGGACCACUAG	rno-miR-203a-3p	rno-miR-203a-3p
277	20501526	rno-miR-204-5p	MIMAT0000877	-0.0451899	down	0.890158	5.29445	5.33964	5.78193	4.89941	5.14357	5.62865	5.09342	5.35529	MIMAT0000877_st	1:226013026-226013047 (+)	22	UUCCCUUUGUCAUCCUAUGCCU	rno-miR-204-5p	rno-miR-204-5p
278	20501527	rno-miR-204-3p	MIMAT0004739	0.454646	up	0.107835	1.54232	1.08767	0.899118	1.20268	1.00241	1.71074	1.36149	1.71353	MIMAT0004739_st	1:226013065-226013086 (+)	22	GCUGGGAAGGCAAAGGGACGUU	rno-miR-204-3p	rno-miR-204-3p
279	20501528	rno-miR-205	MIMAT0000878	0.0976459	up	0.715134	0.991669	0.894023	1.03291	0.828367	1.17037	1.25285	0.478792	0.89379	MIMAT0000878_st	13:109352424-109352446 (-)	23	UCCUUCAUUCCACCGGAGUCUGU	rno-miR-205	rno-miR-205
280	20501529	rno-miR-206-5p	MIMAT0017154	0.671062	up	0.0813606	2.12097	1.44991	1.64766	1.86226	1.29522	2.6613	1.40684	1.83935	MIMAT0017154_st	9:19401997-19402018 (+)	22	ACAUGCUUCUUUAUAUCCUCAU	rno-miR-206-5p	rno-miR-206-5p
281	20501530	rno-miR-206-3p	MIMAT0000879	0.232022	up	0.693898	1.62918	1.39715	1.11937	0.650752	1.62463	1.77493	1.44746	2.46184	MIMAT0000879_st	9:19402035-19402056 (+)	22	UGGAAUGUAAGGAAGUGUGUGG	rno-miR-206-3p	rno-miR-206-3p
282	20501531	rno-miR-208a-5p	MIMAT0017155	-0.075401	down	0.826767	6.50462	6.58002	6.29616	6.9197	6.67434	6.64443	6.76957	5.94973	MIMAT0017155_st	15:33052004-33052025 (-)	22	GAGCUUUUGGCCCGGGUUAUAC	rno-miR-208a-5p	rno-miR-208a-5p
283	20501532	rno-miR-208a-3p	MIMAT0000880	0.22052	up	0.490242	10.8655	10.645	10.8001	10.371	10.5941	10.8864	10.5408	11.3391	MIMAT0000880_st	15:33051973-33051990 (-)	18	AUAAGACGAGCAAAAAGC	rno-miR-208a-3p	rno-miR-208a-3p
284	20501533	rno-miR-210-5p	MIMAT0017156	0.498731	up	0.358036	1.70089	1.20216	0.8773	2.50853	1.04823	1.45384	1.68094	1.1403	MIMAT0017156_st	1:201415717-201415738 (-)	22	AGCCACUGCCCACAGCACACUG	rno-miR-210-5p	rno-miR-210-5p
285	20501534	rno-miR-210-3p	MIMAT0000881	0.320683	up	0.22864	0.864818	0.544135	0.60973	0.798043	0.560985	0.518768	0.46169	1.27764	MIMAT0000881_st	1:201415679-201415700 (-)	22	CUGUGCGUGUGACAGCGGCUGA	rno-miR-210-3p	rno-miR-210-3p
286	20501535	rno-miR-211-5p	MIMAT0000882	0.119978	up	0.678625	4.89163	4.77165	4.90425	4.96644	4.93221	4.46929	4.4785	5.23916	MIMAT0000882_st	1:118642424-118642445 (+)	22	UUCCCUUUGUCAUCCUUUGCCU	rno-miR-211-5p	rno-miR-211-5p
287	20501536	rno-miR-211-3p	MIMAT0017157	0.115694	up	0.487162	9.61207	9.49638	9.58987	9.37677	9.41714	9.58987	9.48213	9.86959	MIMAT0017157_st	1:118642460-118642479 (+)	20	GGCAAGGACAGCAAAGGGGG	rno-miR-211-3p	rno-miR-211-3p
288	20501537	rno-miR-212-5p	MIMAT0017158	0.0893155	up	0.336664	10.5739	10.4846	10.5408	10.6508	10.4565	10.4201	10.4565	10.6508	MIMAT0017158_st	10:62480465-62480488 (+)	24	ACCUUGGCUCUAGACUGCUUACUG	rno-miR-212-5p	rno-miR-212-5p
289	20501538	rno-miR-212-3p	MIMAT0000883	-0.175482	down	0.426315	0.836498	1.01198	0.924958	0.946848	0.77274	0.933905	1.33824	0.628742	MIMAT0000883_st	10:62480505-62480526 (+)	22	UAACAGUCUCCAGUCACGGCCA	rno-miR-212-3p	rno-miR-212-3p
290	20501539	rno-miR-181a-1-3p	MIMAT0000884	-0.0920355	down	0.834325	3.56214	3.65417	3.31822	4.25988	3.92494	3.43644	3.71936	2.9901	MIMAT0000884_st	13:51132571-51132592 (+)	22	ACCAUCGACCGUUGAUUGUACC	rno-miR-181a-1-3p	rno-miR-181a-1-3p
291	20501540	rno-miR-214-5p	MIMAT0017159	-0.0579934	down	0.241826	0.619324	0.677318	0.629897	0.589518	0.6464	0.629897	0.755657	0.638558	MIMAT0017159_st	13:77916198-77916214 (+)	17	AGAGUUGUCAUGUGUCU	rno-miR-214-5p	rno-miR-214-5p
292	20501541	rno-miR-214-3p	MIMAT0000885	0.0544352	up	0.806387	6.5671	6.51267	6.59194	6.53115	6.27173	6.29616	6.67434	6.874	MIMAT0000885_st	13:77916255-77916275 (+)	21	ACAGCAGGCACAGACAGGCAG	rno-miR-214-3p	rno-miR-214-3p
293	20501542	rno-miR-216a-5p	MIMAT0000886	0.105605	up	0.678589	6.40476	6.29915	6.23443	6.19765	5.97016	6.46123	6.69286	6.55539	MIMAT0000886_st	14:109666099-109666120 (+)	22	UAAUCUCAGCUGGCAACUGUGA	rno-miR-216a-5p	rno-miR-216a-5p
294	20501543	rno-miR-216a-3p	MIMAT0017160	0.194453	up	0.384804	0.989182	0.794729	0.664998	1.35781	0.85132	0.873745	0.867868	0.735995	MIMAT0017160_st	14:109666139-109666160 (+)	22	CACAGUGGUCUCUGGGAUUAUG	rno-miR-216a-3p	rno-miR-216a-3p
295	20501544	rno-miR-217-5p	MIMAT0000887	0.0403047	up	0.834078	1.99156	1.95125	2.0876	1.96063	1.65473	1.83171	2.11143	2.18233	MIMAT0000887_st	14:109673511-109673532 (+)	22	UACUGCAUCAGGAACUGACUGG	rno-miR-217-5p	rno-miR-217-5p
296	20501545	rno-miR-217-3p	MIMAT0017161	0.0377841	up	0.889129	6.2156	6.17781	6.43014	5.88053	6.11986	6.14314	5.98344	6.62312	MIMAT0017161_st	14:109673549-109673570 (+)	22	AUCAGUUCCUAAUGCAUUGCCU	rno-miR-217-3p	rno-miR-217-3p
297	20501546	rno-miR-218a-5p	MIMAT0000888	-0.158314	down	0.225913	11.2803	11.4386	11.5116	11.4652	11.4652	11.2442	11.3391	11.1316	MIMAT0000888_st	10:20487456-20487476 (+) // 14:67642422-67642442 (-)	21	UUGUGCUUGAUCUAACCAUGU	rno-miR-218a-5p	rno-miR-218a-5p
298	20501547	rno-miR-218a-2-3p	MIMAT0004740	-0.208461	down	0.633096	2.66796	2.87642	2.91444	2.49744	2.86428	2.07001	2.85055	3.43644	MIMAT0004740_st	10:20487498-20487519 (+)	22	CAUGGUUCUGUCAAGCACCGCG	rno-miR-218a-2-3p	rno-miR-218a-2-3p
299	20501548	rno-miR-218a-1-3p	MIMAT0017162	-0.481041	down	0.132283	4.86076	5.3418	5.63716	4.79394	5.06155	5.22389	5.32671	4.56447	MIMAT0017162_st	14:67642383-67642403 (-)	21	AAACAUGGUUCCGUCAAGCAC	rno-miR-218a-1-3p	rno-miR-218a-1-3p
300	20501549	rno-miR-219a-5p	MIMAT0000889	-0.136715	down	0.751921	1.84937	1.98608	1.99664	2.03661	1.61491	2.32912	2.3467	1.18238	MIMAT0000889_st	20:4967821-4967841 (+) // 3:8833962-8833982 (-)	21	UGAUUGUCCAAACGCAAUUCU	rno-miR-219a-5p	rno-miR-219a-5p
301	20501550	rno-miR-219a-1-3p	MIMAT0004741	-0.155881	down	0.419396	10.3411	10.497	10.4201	10.5941	10.6508	10.371	10.4201	10.0584	MIMAT0004741_st	20:4967862-4967883 (+)	22	AGAGUUGCGUCUGGACGUCCCG	rno-miR-219a-1-3p	rno-miR-219a-1-3p
302	20501551	rno-miR-219a-2-3p	MIMAT0005446	0.0235855	up	0.839842	4.32481	4.30123	4.35378	4.38654	4.25988	4.11861	4.29003	4.46929	MIMAT0005446_st	3:8833918-8833939 (-)	22	AGAAUUGUGGCUGGACAUCUGU	rno-miR-219a-2-3p	rno-miR-219a-2-3p
303	20501552	rno-miR-221-5p	MIMAT0017163	-1.18345	down	0.101638	2.13375	3.3172	3.08673	1.60266	4.25125	2.52299	2.6136	2.2756	MIMAT0017163_st	X:14935641-14935663 (+)	23	ACCUGGCAUACAAUGUAGAUUUC	rno-miR-221-5p	rno-miR-221-5p
304	20501553	rno-miR-221-3p	MIMAT0000890	0.499966	up	0.0328739	5.81493	5.31496	5.25321	5.94973	5.37821	5.51161	5.31346	5.98344	MIMAT0000890_st	X:14935681-14935703 (+)	23	AGCUACAUUGUCUGCUGGGUUUC	rno-miR-221-3p	rno-miR-221-3p
305	20501554	rno-miR-222-5p	MIMAT0017164	0.26465	up	0.0738845	0.859896	0.595247	0.728494	0.798043	0.478792	1.02361	0.578455	0.758037	MIMAT0017164_st	X:14935077-14935097 (+)	21	GGCUCAGUAGCCAGUGUAGAU	rno-miR-222-5p	rno-miR-222-5p
306	20501555	rno-miR-222-3p	MIMAT0000891	-0.074625	down	0.555802	10.6855	10.7602	10.7402	10.4565	10.7402	10.8001	10.8001	10.8001	MIMAT0000891_st	X:14935117-14935137 (+)	21	AGCUACAUCUGGCUACUGGGU	rno-miR-222-3p	rno-miR-222-3p
307	20501556	rno-miR-223-5p	MIMAT0017165	0.144862	up	0.455547	1.32472	1.17986	1.22853	1.45936	1.25739	0.999202	1.05365	1.5156	MIMAT0017165_st	X:83869078-83869100 (+)	23	CGUGUAUUUGACAAGCUGAGUUG	rno-miR-223-5p	rno-miR-223-5p
308	20501557	rno-miR-223-3p	MIMAT0000892	0.00554759	up	0.988302	1.06609	1.06054	0.975165	0.608944	0.644968	1.38009	1.5615	1.20924	MIMAT0000892_st	X:83869120-83869140 (+)	21	UGUCAGUUUGUCAAAUACCCC	rno-miR-223-3p	rno-miR-223-3p
309	20501558	rno-miR-290	MIMAT0000893	-0.537022	down	0.663424	2.58012	3.11715	5.03387	2.41335	1.67332	1.70448	2.64425	3.62254	MIMAT0000893_st	1:64274977-64274994 (-)	18	UCUCAAACUAUGGGGGCA	rno-miR-290	rno-miR-290
310	20501559	rno-miR-291a-5p	MIMAT0000894	-0.395125	down	0.254779	1.49502	1.89014	2.33713	1.62529	1.92096	1.23447	1.41233	1.62529	MIMAT0000894_st	1:64274675-64274696 (-)	22	CAUCAAAGUGGAGGCCCUCUCU	rno-miR-291a-5p	rno-miR-291a-5p
311	20501560	rno-miR-291a-3p	MIMAT0000895	0.061722	up	0.813655	0.937449	0.875727	0.671237	1.27441	1.09183	0.994525	0.864118	0.543412	MIMAT0000895_st	1:64274638-64274660 (-)	23	AAAGUGCUUCCACUUUGUGUGCC	rno-miR-291a-3p	rno-miR-291a-3p
312	20501561	rno-miR-292-5p	MIMAT0000896	0.335087	up	0.305621	1.32448	0.989398	1.21937	1.52508	0.578455	0.929095	1.17037	1.51928	MIMAT0000896_st	1:64274389-64274410 (-)	22	ACUCAAACUGGGGGCUCUUUUG	rno-miR-292-5p	rno-miR-292-5p
313	20501562	rno-miR-292-3p	MIMAT0000897	-0.252743	down	0.586066	6.68911	6.94185	6.46123	6.874	6.59194	6.62312	7.77238	6.57021	MIMAT0000897_st	1:64274349-64274371 (-)	23	AAGUGCCGCCAGGUUUUGAGUGU	rno-miR-292-3p	rno-miR-292-3p
314	20501563	rno-miR-296-5p	MIMAT0000898	-0.0351555	down	0.441214	0.801256	0.836412	0.828367	0.846468	0.793053	0.814102	0.887815	0.743198	MIMAT0000898_st	3:165193865-165193885 (-)	21	AGGGCCCCCCCUCAAUCCUGU	rno-miR-296-5p	rno-miR-296-5p
315	20501564	rno-miR-296-3p	MIMAT0004742	-0.0319911	down	0.893727	5.84873	5.88072	5.80381	6.00914	5.74049	5.45872	6.09785	6.07831	MIMAT0004742_st	3:165193830-165193851 (-)	22	GAGGGUUGGGUGGAGGCUCUCC	rno-miR-296-3p	rno-miR-296-3p
316	20501565	rno-miR-297	MIMAT0000899	-0.37786	down	0.314538	2.72593	3.10379	3.60384	2.85055	2.9901	2.9901	2.71742	2.33713	MIMAT0000899_st	10:102801324-102801346 (-)	23	AUGUAUGUGUGCAUGUAUGCAUG	rno-miR-297	rno-miR-297
317	20501566	rno-miR-298-5p	MIMAT0000900	0.0955983	up	0.834372	4.97299	4.87739	4.42535	5.44368	5.24039	4.27661	4.96644	5.19867	MIMAT0000900_st	3:165194322-165194344 (-)	23	GGCAGAGGAGGGCUGUUCUUCCC	rno-miR-298-5p	rno-miR-298-5p
318	20501567	rno-miR-298-3p	MIMAT0017166	0.301775	up	0.427772	5.36129	5.05951	5.45872	5.24039	5.16202	5.78193	4.5578	5.06155	MIMAT0017166_st	3:165194282-165194303 (-)	22	AGGAACUAGCCUUCUCUCUGCU	rno-miR-298-3p	rno-miR-298-3p
319	20501568	rno-miR-299a-5p	MIMAT0000901	-0.456574	down	0.604226	3.24241	3.69898	4.61061	4.39387	2.6613	2.82483	3.82504	2.50853	MIMAT0000901_st	6:134389828-134389849 (+)	22	UGGUUUACCGUCCCACAUACAU	rno-miR-299a-5p	rno-miR-299a-5p
320	20501569	rno-miR-299a-3p	MIMAT0017167	0.0527975	up	0.757888	0.871846	0.819048	0.704922	0.798043	0.981067	0.680985	0.771157	1.13651	MIMAT0017167_st	6:134389860-134389880 (+)	21	UAUGUGGGACGGUAAACCGCU	rno-miR-299a-3p	rno-miR-299a-3p
321	20501570	rno-miR-300-5p	MIMAT0004743	0.217734	up	0.112328	5.01766	4.79992	4.82919	5.21652	4.72169	4.93221	4.8489	4.90425	MIMAT0004743_st	6:134405242-134405263 (+)	22	UUGAAGAGAGGUUAUCCUUUGU	rno-miR-300-5p	rno-miR-300-5p
322	20501571	rno-miR-300-3p	MIMAT0000902	-0.039974	down	0.51667	10.9008	10.9408	11.0496	10.8864	10.8864	10.9296	10.8864	10.8864	MIMAT0000902_st	6:134405287-134405308 (+)	22	UAUGCAAGGGCAAGCUCUCUUC	rno-miR-300-3p	rno-miR-300-3p
323	20501572	rno-miR-320-5p	MIMAT0017168	0.426269	up	0.184409	1.17605	0.749777	0.560985	1.07349	0.568975	1.54677	1.11937	0.90788	MIMAT0017168_st	15:50842973-50842994 (+)	22	GCCUUCUCUUCCCGGUUCUUCC	rno-miR-320-5p	rno-miR-320-5p
324	20501573	rno-miR-320-3p	MIMAT0000903	0.228898	up	0.305077	1.1907	0.961804	0.779005	1.03291	1.06868	1.53385	1.03773	1.00535	MIMAT0000903_st	15:50843005-50843026 (+)	22	AAAAGCUGGGUUGAGAGGGCGA	rno-miR-320-3p	rno-miR-320-3p
325	20501775	rno-miR-196b-5p	MIMAT0001082	-0.169194	down	0.275197	12.4784	12.6476	12.6056	12.224	12.7316	12.6056	12.6056	12.6056	MIMAT0001082_st	4:80530427-80530448 (-)	22	UAGGUAGUUUCCUGUUGUUGGG	rno-miR-196b-5p	rno-miR-196b-5p
326	20501776	rno-miR-196b-3p	MIMAT0017171	0.0124747	up	0.982168	4.27001	4.25754	4.08238	4.65358	3.78463	3.46325	4.90561	4.6932	MIMAT0017171_st	4:80530391-80530413 (-)	23	UCGACAGCACGACACUGCCUUCA	rno-miR-196b-3p	rno-miR-196b-3p
327	20502103	rno-miR-421-5p	MIMAT0001320	0.107894	up	0.657859	8.00135	7.89346	7.97831	7.57812	7.77238	8.12828	7.92968	8.29766	MIMAT0001320_st	X:91563465-91563485 (-)	21	GGCCUCAUUAAAUGUUUGUUG	rno-miR-421-5p	rno-miR-421-5p
328	20502104	rno-miR-421-3p	MIMAT0017175	-0.00225133	down	0.970421	8.37959	8.38185	8.29766	8.42618	8.37372	8.33888	8.47416	8.37372	MIMAT0017175_st	X:91563429-91563448 (-)	20	AUCAACAGACAUUAAUUGGG	rno-miR-421-3p	rno-miR-421-3p
329	20502357	rno-miR-448-5p	MIMAT0017177	-0.03813	down	0.934308	1.48194	1.52007	1.20458	0.997723	1.17895	1.4645	2.17667	1.98359	MIMAT0017177_st	X:31053594-31053615 (-)	22	AACAUCCUGCAUAGUGCUGCCA	rno-miR-448-5p	rno-miR-448-5p
330	20502358	rno-miR-448-3p	MIMAT0001534	0.0458072	up	0.79398	1.06258	1.01677	0.946848	1.03773	0.953792	0.816027	1.14967	1.33398	MIMAT0001534_st	X:31053536-31053556 (-)	21	UUGCAUAUGUAGGAUGUCCCA	rno-miR-448-3p	rno-miR-448-3p
331	20502363	rno-miR-429	MIMAT0001538	-0.233063	down	0.423992	0.977819	1.21088	1.0126	1.35439	1.5156	0.956417	1.10445	0.622648	MIMAT0001538_st	5:172897196-172897217 (-)	22	UAAUACUGUCUGGUAAUGCCGU	rno-miR-429	rno-miR-429
332	20502370	rno-miR-449a-5p	MIMAT0001543	-0.429962	down	0.470694	1.98613	2.4161	2.05187	1.72261	1.81549	2.45176	3.38093	1.78403	MIMAT0001543_st	2:44418288-44418309 (+)	22	UGGCAGUGUAUUGUUAGCUGGU	rno-miR-449a-5p	rno-miR-449a-5p
333	20502371	rno-miR-449a-3p	MIMAT0017181	-0.375399	down	0.343532	1.61425	1.98965	2.40336	1.56978	1.61115	1.18083	1.95442	2.09213	MIMAT0017181_st	2:44418328-44418349 (+)	22	CAGCUAACAUGCAACUGCUCUC	rno-miR-449a-3p	rno-miR-449a-3p
334	20502377	rno-miR-450a-5p	MIMAT0001547	0.124912	up	0.0210263	1.11236	0.987446	0.994525	1.15854	1.02594	1.08342	0.941873	1.09511	MIMAT0001547_st	X:139994999-139995020 (-)	22	UUUUGCGAUGUGUUCCUAAUGU	rno-miR-450a-5p	rno-miR-450a-5p
335	20502378	rno-miR-450a-3p	MIMAT0017183	0.0204134	up	0.943236	1.00149	0.981074	0.806637	0.864118	1.2394	0.680985	0.897188	1.45936	MIMAT0017183_st	X:139994966-139994986 (-)	21	UAUUGGGAACAUUUUGCAUAA	rno-miR-450a-3p	rno-miR-450a-3p
336	20502380	rno-miR-365-5p	MIMAT0017184	0.189597	up	0.192638	10.0065	9.81687	9.91808	9.97053	9.76627	10.2125	9.76627	9.83634	MIMAT0017184_st	10:65914962-65914978 (+)	17	GAGGGACUUUCAGGGGC	rno-miR-365-5p	rno-miR-365-5p
337	20502381	rno-miR-365-3p	MIMAT0001549	0.216565	up	0.617403	6.22107	6.00451	6.19765	5.64567	6.09785	6.09785	5.71802	6.9197	MIMAT0001549_st	10:65915002-65915023 (+)	22	UAAUGCCCCUAAAAAUCCUUAU	rno-miR-365-3p	rno-miR-365-3p
338	20502439	rno-miR-431	MIMAT0001626	-0.106024	down	0.873191	3.91402	4.02005	4.46929	3.08673	4.23763	3.77507	3.35323	4.88027	MIMAT0001626_st	6:134182326-134182346 (+)	21	UGUCUUGCAGGCCGUCAUGCA	rno-miR-431	rno-miR-431
339	20502442	rno-miR-433-5p	MIMAT0017192	-0.0598889	down	0.496	0.743537	0.803426	0.68703	0.6464	0.880072	0.83272	0.843177	0.751492	MIMAT0017192_st	6:134183227-134183248 (+)	22	UACGGUGAGCCUGUCAUUAUUC	rno-miR-433-5p	rno-miR-433-5p
340	20502443	rno-miR-433-3p	MIMAT0001628	-0.222214	down	0.775459	2.49739	2.71961	3.67544	1.75101	2.35995	2.18233	2.12343	3.55883	MIMAT0001628_st	6:134183279-134183300 (+)	22	AUCAUGAUGGGCUCCUCGGUGU	rno-miR-433-3p	rno-miR-433-3p
341	20502448	rno-miR-451-5p	MIMAT0001633	-0.648689	down	0.27456	3.43737	4.08606	4.25125	2.46184	4.22229	4.00784	3.78463	3.84242	MIMAT0001633_st	10:64129534-64129555 (+)	22	AAACCGUUACCAUUACUGAGUU	rno-miR-451-5p	rno-miR-451-5p
342	20502449	rno-miR-451-3p	MIMAT0017193	0.189122	up	0.226199	4.52024	4.33111	4.56447	4.57806	4.11861	4.48771	4.31026	4.49495	MIMAT0017193_st	10:64129561-64129583 (+)	23	AUGGUAAUGGUUCUCUUGCUGCU	rno-miR-451-3p	rno-miR-451-3p
343	20504132	rno-miR-489-5p	MIMAT0017196	0.0117039	up	0.901714	0.776891	0.765187	0.628742	0.684258	0.887815	0.803238	0.779005	0.843177	MIMAT0017196_st	4:28518320-28518343 (-)	24	UGUCGUAUGCGUGAUGACACGUUC	rno-miR-489-5p	rno-miR-489-5p
344	20504133	rno-miR-489-3p	MIMAT0003113	0.326782	up	0.29001	1.13696	0.810177	0.814102	1.47911	0.69435	0.626742	0.922078	1.30502	MIMAT0003113_st	4:28518284-28518305 (-)	22	AUGACAUCACAUAUAUGGCAGC	rno-miR-489-3p	rno-miR-489-3p
345	20504134	rno-miR-383-5p	MIMAT0003114	-0.207301	down	0.695699	3.51472	3.72202	4.09478	2.88146	3.62254	3.26883	3.44874	4.39387	MIMAT0003114_st	16:57663845-57663865 (+)	21	CAGAUCAGAAGGUGACUGUGG	rno-miR-383-5p	rno-miR-383-5p
346	20504135	rno-miR-383-3p	MIMAT0017197	0.100605	up	0.782229	1.19044	1.08984	0.860467	0.94338	1.5563	0.941873	0.852743	1.68607	MIMAT0017197_st	16:57663887-57663907 (+)	21	CCACAGCACUGCCUGGUCAGA	rno-miR-383-3p	rno-miR-383-3p
347	20504136	rno-miR-207	MIMAT0003115	0.535677	up	0.675956	3.84231	3.30663	4.93221	2.37762	3.16499	5.03069	1.82269	4.11861	MIMAT0003115_st	5:58101237-58101259 (+)	23	CUUCUCCUGGCUCUCCUCCCUUU	rno-miR-207	rno-miR-207
348	20504137	rno-miR-501-5p	MIMAT0003116	-0.368137	down	0.0462755	0.966012	1.33415	1.3499	1.05365	1.15854	1.04823	1.49401	0.796155	MIMAT0003116_st	X:27331164-27331183 (+)	20	AAUCCUUUGUCCCUGGGUGA	rno-miR-501-5p	rno-miR-501-5p
349	20504138	rno-miR-501-3p	MIMAT0017198	0.634098	up	0.223226	7.06178	6.42768	6.80215	6.82101	5.94973	6.59194	6.53115	7.77238	MIMAT0017198_st	X:27331201-27331223 (+)	23	AAUGCACCCGGGCAAGGAUUUGG	rno-miR-501-3p	rno-miR-501-3p
350	20504139	rno-miR-361-5p	MIMAT0003117	0.124804	up	0.676069	1.90471	1.7799	1.95442	1.62463	2.06815	2.13507	1.31715	1.95442	MIMAT0003117_st	X:101800188-101800209 (-)	22	UUAUCAGAAUCUCCAGGGGUAC	rno-miR-361-5p	rno-miR-361-5p
351	20504140	rno-miR-361-3p	MIMAT0017199	0.30118	up	0.270711	6.33345	6.03227	6.36784	6.05878	5.7588	6.34962	5.97016	6.59194	MIMAT0017199_st	X:101800148-101800171 (-)	24	CCCCCAGGUGUGAUUCUGAUUCGU	rno-miR-361-3p	rno-miR-361-3p
352	20504141	rno-miR-215	MIMAT0003118	0.172016	up	0.346285	9.46884	9.29682	9.20783	9.76627	9.26549	9.32012	9.41714	9.32012	MIMAT0003118_st	13:101312701-101312722 (+)	22	AUGACCUAUGAUUUGACAGACA	rno-miR-215	rno-miR-215
353	20504142	rno-miR-224-5p	MIMAT0003119	-0.105658	down	0.379765	0.626573	0.732231	0.633798	0.655322	0.633798	0.680985	0.929095	0.543412	MIMAT0003119_st	X:158348514-158348535 (+)	22	CAAGUCACUAGUGGUUCCGUUU	rno-miR-224-5p	rno-miR-224-5p
354	20504143	rno-miR-224-3p	MIMAT0017200	0.133649	up	0.836304	5.73184	5.59819	4.79394	6.1814	6.48904	5.98344	5.51161	5.03069	MIMAT0017200_st	X:158348561-158348582 (+)	22	AAAUGGUGCCCUAGUGACUACA	rno-miR-224-3p	rno-miR-224-3p
355	20504146	rno-miR-483-5p	MIMAT0017201	0.178826	up	0.376664	0.922676	0.74385	0.650752	1.02978	0.627007	0.633798	0.953792	1.10445	MIMAT0017201_st	1:202910653-202910674 (-)	22	AAGACGGGAGAAGAGAAGGGAG	rno-miR-483-5p	rno-miR-483-5p
356	20504147	rno-miR-483-3p	MIMAT0003121	0.177526	up	0.098914	4.17959	4.00206	3.90269	4.302	4.05175	4.16275	4.05175	4.074	MIMAT0003121_st	1:202910615-202910636 (-)	22	CACUCCUCCCCUCCCGUCUUGU	rno-miR-483-3p	rno-miR-483-3p
357	20504148	rno-miR-370-5p	MIMAT0017202	-0.22601	down	0.244789	0.838228	1.06424	1.35439	0.735995	1.01383	0.837995	0.824492	0.940695	MIMAT0017202_st	6:134210206-134210229 (+)	24	CAGGUCACGUCUCUGCAGUUACAC	rno-miR-370-5p	rno-miR-370-5p
358	20504149	rno-miR-370-3p	MIMAT0003122	0.0911117	up	0.539844	0.615782	0.52467	0.689158	0.819307	0.435268	0.578455	0.449583	0.449583	MIMAT0003122_st	6:134210241-134210262 (+)	22	GCCUGCUGGGGUGGAACCUGGU	rno-miR-370-3p	rno-miR-370-3p
359	20504150	rno-miR-377-5p	MIMAT0017203	0.272966	up	0.412828	5.85085	5.57789	5.88053	5.43005	5.44368	5.80381	5.40945	6.31871	MIMAT0017203_st	6:134421782-134421803 (+)	22	AGAGGUUGCCCUUGGUGAAUUC	rno-miR-377-5p	rno-miR-377-5p
360	20504151	rno-miR-377-3p	MIMAT0003123	-0.497358	down	0.398234	2.1789	2.67625	2.76112	3.18015	2.40336	1.82269	2.86428	1.53385	MIMAT0003123_st	6:134421817-134421839 (+)	23	UGAAUCACACAAAGGCAACUUUU	rno-miR-377-3p	rno-miR-377-3p
361	20504152	rno-miR-412-5p	MIMAT0017204	0.267161	up	0.617742	3.23329	2.96613	2.14341	3.20949	3.5128	3.70063	3.24219	2.78976	MIMAT0017204_st	6:134424664-134424683 (+)	20	UGGUCGACCAGCUGGAAAGU	rno-miR-412-5p	rno-miR-412-5p
362	20504153	rno-miR-412-3p	MIMAT0003124	0.107899	up	0.487554	0.925897	0.817998	1.01001	0.747663	0.810012	1.04038	0.633969	0.989645	MIMAT0003124_st	6:134424700-134424721 (+)	22	CUUCACCUGGUCCACUAGCCGU	rno-miR-412-3p	rno-miR-412-3p
363	20504154	rno-miR-1-5p	MIMAT0003162	-0.220786	down	0.534636	0.95666	1.17745	0.728494	1.01756	1.00241	0.862773	1.80144	0.989645	MIMAT0003162_st	18:2191724-2191745 (-)	22	GCACAUACUUCUUUAUGUACCC	rno-miR-1-5p	rno-miR-1-5p
364	20504155	rno-miR-1-3p	MIMAT0003125	0.0131663	up	0.906668	7.90401	7.89084	7.86624	7.80549	7.80549	7.82641	8.0008	8.08013	MIMAT0003125_st	18:2191683-2191704 (-)	22	UGGAAUGUAAAGAAGUGUGUAU	rno-miR-1-3p	rno-miR-1-3p
365	20504156	rno-miR-133b-5p	MIMAT0017205	0.0889833	up	0.655109	8.64107	8.55209	8.42618	8.47416	8.69785	8.97488	8.53223	8.47416	MIMAT0017205_st	9:19405880-19405900 (+)	21	GCUGGUCAAACGGAACCAAGU	rno-miR-133b-5p	rno-miR-133b-5p
366	20504157	rno-miR-133b-3p	MIMAT0003126	0.265298	up	0.562142	2.92028	2.65498	2.39088	3.60384	2.55659	2.85055	3.01746	2.30644	MIMAT0003126_st	9:19405917-19405938 (+)	22	UUUGGUCCCCUUCAACCAGCUA	rno-miR-133b-3p	rno-miR-133b-3p
367	20504206	rno-miR-540-5p	MIMAT0017211	-0.414546	down	0.269603	1.4192	1.83374	1.4645	1.55137	1.70761	1.67332	2.32912	1.03291	MIMAT0017211_st	6:134177047-134177069 (+)	23	CAAGGGUCACCCUCUGACUCUGU	rno-miR-540-5p	rno-miR-540-5p
368	20504207	rno-miR-540-3p	MIMAT0003174	-0.736566	down	0.285376	1.49255	2.22911	1.54271	1.12552	2.58804	2.46184	2.55659	0.890288	MIMAT0003174_st	6:134177084-134177105 (+)	22	AGGUCAGAGGUCGAUCCUGGGC	rno-miR-540-3p	rno-miR-540-3p
369	20504208	rno-miR-543-5p	MIMAT0004787	-0.0601721	down	0.782271	0.812739	0.872911	1.00535	1.01756	0.528007	0.755657	1.08538	0.664998	MIMAT0004787_st	6:134397171-134397191 (+)	21	AAGUUGCCCGCGUGUUUUUCG	rno-miR-543-5p	rno-miR-543-5p
370	20504209	rno-miR-543-3p	MIMAT0003175	0.0359539	up	0.796777	0.885909	0.849956	1.02361	0.880072	0.924958	0.937465	0.601298	0.840192	MIMAT0003175_st	6:134397206-134397226 (+)	21	AAACAUUCGCGGUGCACUUCU	rno-miR-543-3p	rno-miR-543-3p
371	20504210	rno-miR-539-5p	MIMAT0003176	0.107798	up	0.887689	3.55664	3.44884	4.43289	2.74724	3.25233	4.44626	2.6613	3.47641	MIMAT0003176_st	6:134408925-134408946 (+)	22	GGAGAAAUUAUCCUUGGUGUGU	rno-miR-539-5p	rno-miR-539-5p
372	20504211	rno-miR-539-3p	MIMAT0017212	0.275793	up	0.123069	1.44506	1.16926	1.09183	1.39714	1.03587	1.62463	1.38009	1.3134	MIMAT0017212_st	6:134408965-134408986 (+)	22	CAUACAAGGGUAAUUUCUUUUC	rno-miR-539-3p	rno-miR-539-3p
373	20504212	rno-miR-541-5p	MIMAT0003177	0.0345872	up	0.879077	1.86233	1.82774	2.16411	1.99664	1.85461	1.78403	1.4645	1.80631	MIMAT0003177_st	6:134423753-134423777 (+)	25	AAGGGAUUCUGAUGUUGGUCACACU	rno-miR-541-5p	rno-miR-541-5p
374	20504213	rno-miR-541-3p	MIMAT0017213	-0.250369	down	0.197709	1.29732	1.54769	1.53385	1.33398	1.68607	1.03291	1.42316	1.52508	MIMAT0017213_st	6:134423795-134423817 (+)	23	AGUGGCGAACACAGAAUCCAUAC	rno-miR-541-3p	rno-miR-541-3p
375	20504214	rno-miR-542-5p	MIMAT0003178	0.144953	up	0.840933	5.36975	5.22479	5.40945	5.7588	4.42535	4.31739	5.83958	6.03306	MIMAT0003178_st	X:139996237-139996258 (-)	22	CUCGGGGAUCAUCAUGUCACGA	rno-miR-542-5p	rno-miR-542-5p
376	20504215	rno-miR-542-3p	MIMAT0003179	0.108217	up	0.82906	1.61276	1.50455	1.47911	2.52299	1.321	1.19286	1.71353	1.12244	MIMAT0003179_st	X:139996199-139996220 (-)	22	UGUGACAGAUUGAUAACUGAAA	rno-miR-542-3p	rno-miR-542-3p
377	20504236	rno-miR-493-5p	MIMAT0017217	-0.234727	down	0.585234	3.9148	4.14952	3.5689	4.09478	4.13008	4.13681	4.74959	3.5128	MIMAT0017217_st	6:134170353-134170374 (+)	22	UUGUACAUGGUAGGCUUUCAUU	rno-miR-493-5p	rno-miR-493-5p
378	20504237	rno-miR-493-3p	MIMAT0003191	0.035015	up	0.935746	1.61847	1.58345	1.38956	1.67332	2.12343	2.11341	1.23737	1.06868	MIMAT0003191_st	6:134170393-134170413 (+)	21	UGAAGGUCUACUGUGUGCCAG	rno-miR-493-3p	rno-miR-493-3p
379	20504238	rno-miR-379-5p	MIMAT0003192	0.138484	up	0.783386	5.05292	4.91444	4.31026	5.62865	5.21652	5.14357	5.21652	4.38654	MIMAT0003192_st	6:134388213-134388233 (+)	21	UGGUAGACUAUGGAACGUAGG	rno-miR-379-5p	rno-miR-379-5p
380	20504239	rno-miR-379-3p	MIMAT0004791	0.202791	up	0.312085	8.83749	8.6347	8.86873	8.73916	8.60919	8.69785	8.42618	9.07545	MIMAT0004791_st	6:134388249-134388270 (+)	22	CUAUGUAACAUGGUCCACUAAC	rno-miR-379-3p	rno-miR-379-3p
381	20504240	rno-miR-494-5p	MIMAT0017218	-0.19776	down	0.669118	4.28443	4.48219	5.13539	3.75696	4.09478	4.6932	4.21639	4.40312	MIMAT0017218_st	6:134394883-134394904 (+)	22	AGGUUGUCCGUGUUGUCUUCUC	rno-miR-494-5p	rno-miR-494-5p
382	20504241	rno-miR-494-3p	MIMAT0003193	-0.0118888	down	0.883492	4.0183	4.03019	3.99203	3.87153	4.03753	4.08858	4.06101	4.09478	MIMAT0003193_st	6:134394916-134394938 (+)	23	UGAAACAUACACGGGAAACCUCU	rno-miR-494-3p	rno-miR-494-3p
383	20504242	rno-miR-376c-5p	MIMAT0017219	-0.658773	down	0.455416	2.66425	3.32302	2.9901	1.11016	3.44874	3.55883	3.53023	3.32375	MIMAT0017219_st	6:134403538-134403558 (+)	21	GUGGAUAUUCCUUCUAUGUUU	rno-miR-376c-5p	rno-miR-376c-5p
384	20504243	rno-miR-376c-3p	MIMAT0003194	0.286481	up	0.530942	3.2974	3.01092	3.10415	2.68358	3.315	3.93979	2.6136	3.26883	MIMAT0003194_st	6:134403575-134403595 (+)	21	AACAUAGAGGAAAUUUCACGU	rno-miR-376c-3p	rno-miR-376c-3p
385	20504244	rno-miR-376b-5p	MIMAT0003195	-0.562946	down	0.527872	4.16269	4.72563	4.88027	5.31346	4.61061	4.57806	4.68602	2.59655	MIMAT0003195_st	6:134404195-134404216 (+)	22	GUGGAUAUUCCUUCUAUGGUUA	rno-miR-376b-5p	rno-miR-376b-5p
386	20504245	rno-miR-376b-3p	MIMAT0003196	0.0535917	up	0.841325	4.68816	4.63457	4.96644	4.44626	4.68602	4.68602	4.25125	4.93221	MIMAT0003196_st	6:134404232-134404252 (+)	21	AUCAUAGAGGAACAUCCACUU	rno-miR-376b-3p	rno-miR-376b-3p
387	20504246	rno-miR-376a-5p	MIMAT0003197	-0.0952012	down	0.420308	5.68908	5.78428	5.7588	5.83958	5.92066	5.64567	5.67339	5.582	MIMAT0003197_st	6:134404702-134404722 (+)	21	GGUAGAUUCUCCUUCUAUGAG	rno-miR-376a-5p	rno-miR-376a-5p
388	20504247	rno-miR-376a-3p	MIMAT0003198	0.106473	up	0.433647	1.00547	0.898997	1.02978	0.965267	0.96696	1.1403	0.700247	0.910848	MIMAT0003198_st	6:134404740-134404760 (+)	21	AUCGUAGAGGAAAAUCCACGU	rno-miR-376a-3p	rno-miR-376a-3p
389	20504248	rno-miR-381-5p	MIMAT0017220	0.0207018	up	0.938998	0.872996	0.852294	0.728494	0.46169	1.1403	1.01298	0.688094	1.14431	MIMAT0017220_st	6:134407700-134407721 (+)	22	AGCGAGGUUGCCCUUUGUAUAU	rno-miR-381-5p	rno-miR-381-5p
390	20504249	rno-miR-381-3p	MIMAT0003199	0.390089	up	0.103733	1.35992	0.969827	1.11273	1.58086	0.671237	1.2415	1.12552	1.25739	MIMAT0003199_st	6:134407741-134407758 (+)	18	UAUACAAGGGCAAGCUCU	rno-miR-381-3p	rno-miR-381-3p
391	20504250	rno-miR-487b-5p	MIMAT0017221	-0.0431562	down	0.732205	1.00066	1.04381	1.05365	1.13651	1.20458	0.94338	0.873202	0.922078	MIMAT0017221_st	6:134408221-134408243 (+)	23	AGUGGUUAUCCCUGUCCUCUUCG	rno-miR-487b-5p	rno-miR-487b-5p
392	20504251	rno-miR-487b-3p	MIMAT0003200	0.455447	up	0.272969	3.15581	2.70037	2.77218	3.59095	2.19759	2.78976	3.13132	3.08673	MIMAT0003200_st	6:134408258-134408279 (+)	22	AAUCGUACAGGGUCAUCCACUU	rno-miR-487b-3p	rno-miR-487b-3p
393	20504252	rno-miR-382-5p	MIMAT0003201	0.0244305	up	0.932987	1.93403	1.9096	1.51928	2.0837	1.83935	2.00764	2.37016	1.71074	MIMAT0003201_st	6:134415275-134415296 (+)	22	GAAGUUGUUCGUGGUGGAUUCG	rno-miR-382-5p	rno-miR-382-5p
394	20504253	rno-miR-382-3p	MIMAT0003202	0.167142	up	0.477583	1.08585	0.918708	0.913327	1.1403	0.824057	0.704922	1.01874	1.41233	MIMAT0003202_st	6:134415311-134415331 (+)	21	AAUCAUUCACGGACAACACUU	rno-miR-382-3p	rno-miR-382-3p
395	20504254	rno-miR-485-5p	MIMAT0003203	-0.3295	down	0.181361	0.859072	1.18857	1.03587	0.92008	0.97887	0.97887	1.55097	0.678267	MIMAT0003203_st	6:134416395-134416416 (+)	22	AGAGGCUGGCCGUGAUGAAUUC	rno-miR-485-5p	rno-miR-485-5p
396	20504255	rno-miR-485-3p	MIMAT0017222	0.101739	up	0.761953	0.929634	0.827894	0.951575	0.51228	0.743198	0.747663	0.78891	1.52896	MIMAT0017222_st	6:134416434-134416455 (+)	22	CAUACACGGCUCUCCUCUCUUC	rno-miR-485-3p	rno-miR-485-3p
397	20504256	rno-miR-409a-5p	MIMAT0003204	0.336099	up	0.644195	5.60781	5.27171	6.32426	4.94399	4.88027	6.36784	4.61061	5.51161	MIMAT0003204_st	6:134424517-134424539 (+)	23	AGGUUACCCGAGCAACUUUGCAU	rno-miR-409a-5p	rno-miR-409a-5p
398	20504257	rno-miR-409a-3p	MIMAT0003205	0.163874	up	0.633375	5.92767	5.76379	6.1814	5.60596	5.582	6.39511	5.52797	5.78193	MIMAT0003205_st	6:134424550-134424569 (+)	20	AAUGUUGCUCGGUGAACCCC	rno-miR-409a-3p	rno-miR-409a-3p
399	20504258	rno-miR-369-5p	MIMAT0003206	0.0662053	up	0.805254	7.4367	7.37049	7.18706	7.85859	7.38169	7.06981	7.54272	7.38169	MIMAT0003206_st	6:134424791-134424812 (+)	22	AGAUCGACCGUGUUAUAUUCGC	rno-miR-369-5p	rno-miR-369-5p
400	20504259	rno-miR-369-3p	MIMAT0003207	-0.412275	down	0.378342	1.29086	1.70313	2.25708	1.55137	1.82269	0.873745	1.02962	1.44746	MIMAT0003207_st	6:134424826-134424846 (+)	21	AAUAAUACAUGGUUGAUCUUU	rno-miR-369-3p	rno-miR-369-3p
401	20504260	rno-miR-374-5p	MIMAT0003208	0.381231	up	0.197842	3.57606	3.19483	3.40271	3.98763	3.0317	3.5128	3.15007	3.22774	MIMAT0003208_st	X:91563609-91563630 (-)	22	AUAUAAUACAACCUGCUAAGUG	rno-miR-374-5p	rno-miR-374-5p
402	20504261	rno-miR-374-3p	MIMAT0017223	0.126773	up	0.479414	0.67333	0.546557	0.793053	0.568975	0.300417	0.622648	0.546202	0.828367	MIMAT0017223_st	X:91563579-91563600 (-)	22	CUUAGCACGUUGUAUUAUUAUU	rno-miR-374-3p	rno-miR-374-3p
403	20504262	rno-miR-363-5p	MIMAT0003209	0.412426	up	0.13396	3.45344	3.04102	2.98007	3.74112	3.35323	3.28088	2.78976	3.33833	MIMAT0003209_st	X:139740704-139740725 (-)	22	CGGGUGGAUCACGAUGCAAUUU	rno-miR-363-5p	rno-miR-363-5p
404	20504263	rno-miR-363-3p	MIMAT0003210	0.0782856	up	0.559821	7.36767	7.28939	7.24664	7.28515	7.33636	7.21288	7.28515	7.60498	MIMAT0003210_st	X:139740662-139740682 (-)	21	AAUUGCACGGUAUCCAUCUGU	rno-miR-363-3p	rno-miR-363-3p
405	20504264	rno-miR-20b-5p	MIMAT0003211	-0.338148	down	0.168029	1.50408	1.84223	1.55097	1.27441	1.96063	1.48682	2.01508	1.75101	MIMAT0003211_st	X:139741113-139741135 (-)	23	CAAAGUGCUCAUAGUGCAGGUAG	rno-miR-20b-5p	rno-miR-20b-5p
406	20504265	rno-miR-20b-3p	MIMAT0003212	-0.390702	down	0.363243	0.946306	1.33701	1.66168	0.629897	0.806637	0.722198	1.54271	1.48682	MIMAT0003212_st	X:139741076-139741097 (-)	22	ACUGCAGUGUGAGCACUUCUGG	rno-miR-20b-3p	rno-miR-20b-3p
407	20504266	rno-miR-503-5p	MIMAT0003213	0.301997	up	0.206347	3.15861	2.85661	2.82483	3.54672	2.92017	3.0317	2.82483	2.8974	MIMAT0003213_st	X:139999913-139999935 (-)	23	UAGCAGCGGGAACAGUACUGCAG	rno-miR-503-5p	rno-miR-503-5p
408	20504267	rno-miR-503-3p	MIMAT0017224	0.222322	up	0.27986	1.12137	0.899047	0.864118	0.937465	0.933905	1.47507	0.899118	0.951575	MIMAT0017224_st	X:139999873-139999895 (-)	23	GGAGUAUUGUUUCCGCUGCCUGG	rno-miR-503-3p	rno-miR-503-3p
409	20504485	rno-miR-378a-5p	MIMAT0003378	0.113143	up	0.627951	1.12392	1.01077	1.06868	1.38009	0.765033	0.793053	1.19861	1.19861	MIMAT0003378_st	18:57377845-57377866 (-)	22	CUCCUGACUCCAGGUCCUGUGU	rno-miR-378a-5p	rno-miR-378a-5p
410	20504486	rno-miR-378a-3p	MIMAT0003379	-0.074499	down	0.867033	2.46643	2.54093	2.3467	3.13132	2.3467	2.41335	2.92938	1.85461	MIMAT0003379_st	18:57377808-57377828 (-)	21	ACUGGACUUGGAGUCAGAAGG	rno-miR-378a-3p	rno-miR-378a-3p
411	20504487	rno-miR-505-5p	MIMAT0017226	0.108936	up	0.559048	0.923522	0.814586	0.803238	1.2415	0.816027	0.873745	0.824492	0.655322	MIMAT0017226_st	X:145929037-145929059 (-)	23	GGGAGCCAGGAAGUAUUGAUGUU	rno-miR-505-5p	rno-miR-505-5p
412	20504488	rno-miR-505-3p	MIMAT0003380	-0.0636827	down	0.873703	2.21861	2.28229	1.78403	2.22647	2.70289	1.75825	2.35995	2.6711	MIMAT0003380_st	X:145929003-145929022 (-)	20	GUCAACACUUGCUGGUUUCC	rno-miR-505-3p	rno-miR-505-3p
413	20504489	rno-miR-499-5p	MIMAT0003381	-0.168888	down	0.312453	4.06158	4.23047	4.06101	4.29003	4.27661	3.90269	4.35378	3.99203	MIMAT0003381_st	3:146127963-146127983 (+)	21	UUAAGACUUGCAGUGAUGUUU	rno-miR-499-5p	rno-miR-499-5p
414	20504490	rno-miR-499-3p	MIMAT0017227	0.0127951	up	0.955466	5.29376	5.28096	5.582	5.22389	5.35529	5.19867	4.90561	5.45872	MIMAT0017227_st	3:146128000-146128021 (+)	22	AACAUCACAGCAAGUCUGUGCU	rno-miR-499-3p	rno-miR-499-3p
415	20504491	rno-miR-664-1-5p	MIMAT0017228	0.228604	up	0.314743	0.971157	0.742553	0.843177	1.20458	0.678267	1.11937	0.706217	0.589518	MIMAT0017228_st	18:47881354-47881374 (+)	21	CUGGCUGGGGAAAAAGAUUGG	rno-miR-664-1-5p	rno-miR-664-1-5p
416	20504492	rno-miR-664-3p	MIMAT0003382	-0.242521	down	0.0320153	0.879625	1.12215	1.05902	0.933905	1.08538	0.936503	1.22204	0.768468	MIMAT0003382_st	13:101254030-101254051 (+) // 18:47881391-47881412 (+)	22	UAUUCAUUUACUCCCCAGCCUA	rno-miR-664-3p	rno-miR-664-3p
417	20504493	rno-miR-664-2-5p	MIMAT0017229	0.102776	up	0.850313	2.33954	2.23677	2.50853	1.80631	2.01945	1.8941	2.18233	3.31822	MIMAT0017229_st	13:101253993-101254013 (+)	21	CUGGCUGGGGAAAAUGAUUGG	rno-miR-664-2-5p	rno-miR-664-2-5p
418	20504494	rno-miR-497-5p	MIMAT0003383	0.11927	up	0.784207	1.12034	1.00107	1.3687	1.0811	1.02361	0.546202	0.610907	1.73372	MIMAT0003383_st	10:57073847-57073868 (+)	22	CAGCAGCACACUGUGGUUUGUA	rno-miR-497-5p	rno-miR-497-5p
419	20504495	rno-miR-497-3p	MIMAT0017230	-0.118958	down	0.0977347	0.808196	0.927154	0.878637	0.837995	0.873202	0.818125	1.02962	0.768468	MIMAT0017230_st	10:57073886-57073908 (+)	23	CCAAACCACACUGUGGUGUUAGA	rno-miR-497-3p	rno-miR-497-3p
420	20506476	rno-miR-466b-5p	MIMAT0005278	-0.294282	down	0.460017	1.81822	2.1125	1.5156	2.21105	2.37016	1.55097	2.45176	1.69263	MIMAT0005278_st	17:79288584-79288605 (-) // 17:79291618-79291639 (-)	22	UAUGUGUGUGUGUAUGUCCAUG	rno-miR-466b-5p	rno-miR-466b-5p
421	20506477	rno-miR-466b-1-3p	MIMAT0017285	0.173899	up	0.301599	0.971845	0.797946	0.852743	0.8773	0.951575	1.17037	0.589518	0.867868	MIMAT0017285_st	17:79291583-79291604 (-)	22	AUACAUACACACACACAUACAC	rno-miR-466b-1-3p	rno-miR-466b-1-3p
422	20506478	rno-miR-466b-2-3p	MIMAT0017286	-0.0543108	down	0.789096	0.697267	0.751578	0.728494	1.05166	0.864118	0.46169	0.662122	0.578455	MIMAT0017286_st	17:79288546-79288566 (-)	21	AUAUACAUACACACAUACACA	rno-miR-466b-2-3p	rno-miR-466b-2-3p
423	20506479	rno-miR-466c-5p	MIMAT0005279	0.126138	up	0.650203	1.04994	0.923802	0.9929	0.68703	0.882987	1.54271	0.89552	0.92008	MIMAT0005279_st	17:79270823-79270843 (-)	21	UGUGAUGUGUGCAUGUACAUG	rno-miR-466c-5p	rno-miR-466c-5p
424	20506480	rno-miR-466c-3p	MIMAT0017287	-0.105747	down	0.254905	0.848844	0.954592	1.04038	0.951575	0.858127	0.849623	0.965267	0.745335	MIMAT0017287_st	17:79270784-79270804 (-)	21	UAUACAUGCACACAUACACAC	rno-miR-466c-3p	rno-miR-466c-3p
425	20506481	rno-miR-743b-5p	MIMAT0017288	-0.054675	down	0.554321	0.724597	0.779272	0.89552	0.638558	0.684258	0.834985	0.758037	0.700247	MIMAT0017288_st	X:152822321-152822342 (-)	22	UGUUCAGACUGGUGUCCAUCAU	rno-miR-743b-5p	rno-miR-743b-5p
426	20506482	rno-miR-743b-3p	MIMAT0005280	-0.426122	down	0.0630011	4.08008	4.50621	4.65358	3.84895	4.38654	4.35378	4.4785	4.03753	MIMAT0005280_st	X:152822286-152822307 (-)	22	GAAAGACACCAUACUGAAUAGA	rno-miR-743b-3p	rno-miR-743b-3p
427	20506483	rno-miR-871-5p	MIMAT0005281	0.175354	up	0.231083	0.977578	0.802223	0.77274	0.745335	0.771157	1.03773	0.862773	1.14967	MIMAT0005281_st	X:152856108-152856131 (-)	24	UAUUCAGAUUGGUGCCGGUCACAU	rno-miR-871-5p	rno-miR-871-5p
428	20506484	rno-miR-871-3p	MIMAT0017289	-0.0310173	down	0.899803	4.25665	4.28767	4.41445	4.64422	4.35378	4.2008	4.09478	3.92494	MIMAT0017289_st	X:152856076-152856097 (-)	22	UGACUGGCACCAUACUGGAUAA	rno-miR-871-3p	rno-miR-871-3p
429	20506485	rno-miR-872-5p	MIMAT0005282	0.447877	up	0.364025	2.62589	2.17802	2.8963	3.10415	1.94511	2.37016	1.69263	2.40336	MIMAT0005282_st	5:114979215-114979235 (+)	21	AAGGUUACUUGUUAGUUCAGG	rno-miR-872-5p	rno-miR-872-5p
430	20506486	rno-miR-872-3p	MIMAT0005283	-0.0173694	down	0.933924	2.45513	2.4725	2.39465	2.71742	2.74724	2.39088	2.2756	2.25708	MIMAT0005283_st	5:114979254-114979275 (+)	22	UGAACUAUUGCAGUAGCCUCCU	rno-miR-872-3p	rno-miR-872-3p
431	20506487	rno-miR-874-5p	MIMAT0017290	-0.444451	down	0.457444	10.9787	11.4232	11.4652	11.6789	11.3391	11.3391	11.4652	9.91808	MIMAT0017290_st	17:12597370-12597390 (+)	21	CGGCCCCACGCACCAGGGUAA	rno-miR-874-5p	rno-miR-874-5p
432	20506488	rno-miR-874-3p	MIMAT0005284	-0.14293	down	0.177633	6.76031	6.90324	6.85354	6.76957	6.82101	6.65781	7.03516	6.85354	MIMAT0005284_st	17:12597405-12597426 (+)	22	CUGCCCUGGCCCGAGGGACCGA	rno-miR-874-3p	rno-miR-874-3p
433	20506489	rno-miR-877	MIMAT0005285	-0.0831504	down	0.891401	1.87558	1.95873	1.58647	1.41233	2.09213	1.26283	2.19759	2.95158	MIMAT0005285_st	20:2958184-2958203 (+)	20	GUAGAGGAGAUGGCGCAGGG	rno-miR-877	rno-miR-877
434	20506490	rno-miR-878	MIMAT0005286	-0.106923	down	0.79381	1.29346	1.40038	1.67332	1.90588	1.54677	1.13651	0.981067	0.837995	MIMAT0005286_st	X:152851749-152851770 (-)	22	GCAUGACACCAUACUGGGUAGA	rno-miR-878	rno-miR-878
435	20506491	rno-miR-879-5p	MIMAT0005287	-0.0427644	down	0.955209	2.76468	2.80744	3.43644	2.98007	3.58875	2.71742	1.39714	2.59655	MIMAT0005287_st	4:21126285-21126305 (-)	21	AGAGGCUUAUAGCUCUAAGCC	rno-miR-879-5p	rno-miR-879-5p
436	20506492	rno-miR-879-3p	MIMAT0017291	-0.17776	down	0.545635	1.62636	1.80412	1.94511	1.4828	2.10946	1.91348	1.35781	1.4828	MIMAT0017291_st	4:21126250-21126270 (-)	21	CUUAUGGCUUCAAGCUUUCGG	rno-miR-879-3p	rno-miR-879-3p
437	20506493	rno-miR-880-5p	MIMAT0017292	0.0113438	up	0.974597	1.43899	1.42765	1.05902	1.40684	1.15577	1.61491	2.06815	1.29522	MIMAT0017292_st	X:152850313-152850333 (-)	21	UACUCAGAUUGGUAUGAGUCA	rno-miR-880-5p	rno-miR-880-5p
438	20506494	rno-miR-880-3p	MIMAT0005288	-0.0299478	down	0.904029	0.7856	0.815548	0.747663	0.633798	0.650752	0.540623	1.04823	1.18238	MIMAT0005288_st	X:152850276-152850297 (-)	22	UACUCCAUUCAUUCUGAGUAGA	rno-miR-880-3p	rno-miR-880-3p
439	20506495	rno-miR-881-5p	MIMAT0017293	0.0749007	up	0.606079	0.966089	0.891188	0.693108	1.01756	0.892039	1.05365	1.08842	0.827052	MIMAT0017293_st	X:152852236-152852254 (-)	19	UAUUCAGAGUGGUAGCAGU	rno-miR-881-5p	rno-miR-881-5p
440	20506496	rno-miR-881-3p	MIMAT0005289	-0.375151	down	0.272051	1.19079	1.56594	1.0811	0.89637	1.72261	1.44746	1.8941	1.22853	MIMAT0005289_st	X:152852199-152852220 (-)	22	UAACUGUGGCAUUUCUGAAUAG	rno-miR-881-3p	rno-miR-881-3p
441	20506497	rno-miR-883-5p	MIMAT0017294	-0.25335	down	0.0228219	0.689022	0.942372	1.01383	0.697627	0.963665	0.77274	0.849623	0.5967	MIMAT0017294_st	X:152829704-152829726 (-)	23	UGCUGAGAGAAGUAGCAGUUACU	rno-miR-883-5p	rno-miR-883-5p
442	20506498	rno-miR-883-3p	MIMAT0005290	0.220132	up	0.610802	1.3461	1.12597	1.25739	1.93567	1.1641	0.610907	0.956417	1.49173	MIMAT0005290_st	X:152829669-152829690 (-)	22	UAACUGCAACAUCUCUCAGUAU	rno-miR-883-3p	rno-miR-883-3p
443	20506503	rno-miR-147	MIMAT0005297	-0.0606418	down	0.803761	4.79666	4.8573	4.89941	4.68012	4.5578	4.59516	5.1147	5.1147	MIMAT0005297_st	3:109612686-109612707 (+)	22	GUGUGCGGAAAUGCUUCUGCUA	rno-miR-147	rno-miR-147
444	20506504	rno-miR-17-2-3p	MIMAT0017295	0.0169251	up	0.969522	7.01087	6.99394	7.21288	6.32426	7.12451	7.08419	6.64443	7.62415	MIMAT0017295_st	X:139741453-139741475 (-)	23	ACUGCACUGCAAGCACUUCUUAC	rno-miR-17-2-3p	rno-miR-17-2-3p
445	20506505	rno-miR-181d-5p	MIMAT0005299	-0.24454	down	0.297167	5.87814	6.12268	5.92066	6.20974	6.19765	5.60596	6.24971	5.81871	MIMAT0005299_st	19:25667577-25667599 (+)	23	AACAUUCAUUGUUGUCGGUGGGU	rno-miR-181d-5p	rno-miR-181d-5p
446	20506506	rno-miR-181d-3p	MIMAT0017296	-0.0836877	down	0.763482	6.89273	6.97641	6.76957	7.21288	7.03516	7.03516	7.12451	6.43014	MIMAT0017296_st	19:25667619-25667638 (+)	20	CCACCGGGGGAUGAAUGUCA	rno-miR-181d-3p	rno-miR-181d-3p
447	20506507	rno-miR-182	MIMAT0005300	-0.106414	down	0.756779	8.22569	8.3321	8.0008	8.69785	8.29766	7.85093	8.69785	8.12828	MIMAT0005300_st	4:57071298-57071322 (-)	25	UUUGGCAAUGGUAGAACUCACACCG	rno-miR-182	rno-miR-182
448	20506508	rno-miR-188-5p	MIMAT0005301	0.00785633	up	0.971806	8.60159	8.59373	8.69785	8.29766	8.47416	8.53223	8.60919	8.97488	MIMAT0005301_st	X:27323557-27323577 (+)	21	CAUCCCUUGCAUGGUGGAGGG	rno-miR-188-5p	rno-miR-188-5p
449	20506509	rno-miR-188-3p	MIMAT0017297	-0.622792	down	0.337993	1.32713	1.94992	0.875017	0.949062	2.45176	1.61115	2.52299	1.42118	MIMAT0017297_st	X:27323596-27323615 (+)	20	CUCCCACAUGCAGGGUUUGC	rno-miR-188-3p	rno-miR-188-3p
450	20506510	rno-miR-190b-5p	MIMAT0005302	-0.00194217	down	0.991634	10.1744	10.1763	10.3221	9.91808	10.1485	10.1485	10.0584	10.4565	MIMAT0005302_st	2:182295100-182295120 (+)	21	UGAUAUGUUUGAUAUUAGGUU	rno-miR-190b-5p	rno-miR-190b-5p
451	20506511	rno-miR-190b-3p	MIMAT0017298	0.601718	up	0.197072	2.48271	1.88099	1.56263	1.83935	1.99664	2.54692	2.0837	3.06185	MIMAT0017298_st	2:182295136-182295155 (+)	20	AACUAAAUGUCAAACAUUCU	rno-miR-190b-3p	rno-miR-190b-3p
452	20506512	rno-miR-196c-5p	MIMAT0005303	-0.121821	down	0.668075	5.34958	5.4714	5.37821	5.81871	5.60596	5.28606	5.43005	4.94399	MIMAT0005303_st	10:84995958-84995979 (+)	22	UAGGUAGUUUCGUGUUGUUGGG	rno-miR-196c-5p	rno-miR-196c-5p
453	20506513	rno-miR-196c-3p	MIMAT0017299	0.0185238	up	0.969338	10.3439	10.3253	10.4565	11.0496	10.371	10.4565	10.1485	9.52552	MIMAT0017299_st	10:84995995-84996016 (+)	22	ACAACAACACCAAACCACCUGA	rno-miR-196c-3p	rno-miR-196c-3p
454	20506514	rno-miR-301b-5p	MIMAT0017300	0.0652804	up	0.65326	0.657319	0.592038	0.758037	0.758037	0.627007	0.496347	0.391072	0.717573	MIMAT0017300_st	11:85885257-85885278 (+)	22	GCUCUGACUAGGUUGCACUACU	rno-miR-301b-5p	rno-miR-301b-5p
455	20506515	rno-miR-301b-3p	MIMAT0005304	0.227129	up	0.625305	7.59487	7.36774	7.77238	6.85354	7.24664	8.08013	7.08419	7.85093	MIMAT0005304_st	11:85885292-85885314 (+)	23	CAGUGCAAUGGUAUUGUCAAAGC	rno-miR-301b-3p	rno-miR-301b-3p
456	20506516	rno-miR-375-5p	MIMAT0017301	0.0649035	up	0.882905	5.10014	5.03524	5.17209	5.00235	5.28939	5.77185	4.64422	4.52623	MIMAT0017301_st	9:74233542-74233564 (-)	23	GCGACGAGCCCCUCGCACAAACC	rno-miR-375-5p	rno-miR-375-5p
457	20506517	rno-miR-375-3p	MIMAT0005307	-0.529997	down	0.0593072	1.91704	2.44704	2.29	1.66168	2.29	2.07001	2.76112	2.01945	MIMAT0005307_st	9:74233508-74233529 (-)	22	UUUGUUCGUUCGGCUCGCGUGA	rno-miR-375-3p	rno-miR-375-3p
458	20506518	rno-miR-380-5p	MIMAT0005308	-0.0196211	down	0.92246	1.03911	1.05873	1.08342	1.1641	1.25478	1.20458	0.837995	0.74864	MIMAT0005308_st	6:134390998-134391019 (+)	22	AUGGUUGACCAUAGAACAUGCG	rno-miR-380-5p	rno-miR-380-5p
459	20506519	rno-miR-380-3p	MIMAT0017302	-0.118443	down	0.547209	7.64046	7.7589	7.60498	7.69489	7.86624	7.33636	7.80549	7.89013	MIMAT0017302_st	6:134391034-134391054 (+)	21	UAUGUAGUAUGGUCCACAUCU	rno-miR-380-3p	rno-miR-380-3p
460	20506520	rno-miR-384-5p	MIMAT0005309	-0.0133394	down	0.961457	5.69984	5.71318	5.71802	5.74049	5.62865	6.11986	5.79287	5.23916	MIMAT0005309_st	X:93446942-93446964 (-)	23	UGUAAACAAUUCCUAGGCAAUGU	rno-miR-384-5p	rno-miR-384-5p
461	20506521	rno-miR-384-3p	MIMAT0005310	-0.139656	down	0.295157	0.854361	0.994017	0.897188	0.903013	0.929095	0.96696	1.15577	0.693108	MIMAT0005310_st	X:93446902-93446923 (-)	22	AUUCCUAGAAAUUGUUCACAAU	rno-miR-384-3p	rno-miR-384-3p
462	20506522	rno-miR-410-5p	MIMAT0017303	-0.791336	down	0.0942391	3.27609	4.06743	3.70063	3.71936	4.16275	3.42534	4.3389	2.68358	MIMAT0017303_st	6:134425092-134425112 (+)	21	AGGUUGUCUGUGAUGAGUUCG	rno-miR-410-5p	rno-miR-410-5p
463	20506523	rno-miR-410-3p	MIMAT0005311	-0.0333256	down	0.958127	3.2177	3.25103	3.80811	2.33713	3.43644	3.46325	2.50853	3.85272	MIMAT0005311_st	6:134425127-134425147 (+)	21	AAUAUAACACAGAUGGCCUGU	rno-miR-410-3p	rno-miR-410-3p
464	20506524	rno-miR-411-5p	MIMAT0005312	0.254904	up	0.120143	3.6819	3.427	3.35323	3.68134	3.67544	3.71936	3.25233	3.64502	MIMAT0005312_st	6:134389357-134389377 (+)	21	UAGUAGACCGUAUAGCGUACG	rno-miR-411-5p	rno-miR-411-5p
465	20506525	rno-miR-411-3p	MIMAT0017304	-0.399046	down	0.452774	8.38331	8.78235	8.73916	9.07545	8.86873	8.60919	8.73916	7.46528	MIMAT0017304_st	6:134389392-134389411 (+)	20	UAUGUAACACGGUCCACUAA	rno-miR-411-3p	rno-miR-411-3p
466	20506526	rno-miR-423-5p	MIMAT0017305	-0.0495625	down	0.80955	1.42642	1.47598	1.74045	1.60071	1.52896	1.29846	1.15854	1.38009	MIMAT0017305_st	10:67078739-67078762 (+)	24	UGAGGGGCAGAGAGCGAGACUUUU	rno-miR-423-5p	rno-miR-423-5p
467	20506527	rno-miR-423-3p	MIMAT0005313	0.161189	up	0.681076	1.28537	1.12418	1.25092	0.739702	1.02978	1.15577	1.09183	1.96063	MIMAT0005313_st	10:67078775-67078797 (+)	23	AGCUCGGUCUGAGGCCCCUCAGU	rno-miR-423-3p	rno-miR-423-3p
468	20506528	rno-miR-425-5p	MIMAT0005314	0.0162888	up	0.949612	4.478	4.46171	4.49495	4.43289	4.06101	4.3389	4.82919	4.66222	MIMAT0005314_st	8:113614827-113614849 (+)	23	AAUGACACGAUCACUCCCGUUGA	rno-miR-425-5p	rno-miR-425-5p
469	20506529	rno-miR-425-3p	MIMAT0017306	0.128374	up	0.389516	4.93808	4.80971	4.86239	4.73334	4.91316	4.98749	4.65358	5.09342	MIMAT0017306_st	8:113614868-113614888 (+)	21	AUCGGGAAUAUCGUGUCCGCC	rno-miR-425-3p	rno-miR-425-3p
470	20506530	rno-miR-434-5p	MIMAT0017307	0.236033	up	0.589788	2.87342	2.63738	2.74724	3.49189	2.76112	2.16411	2.40379	2.96425	MIMAT0017307_st	6:134186271-134186293 (+)	23	AGCUCGACUCAUGGUUUGAACCA	rno-miR-434-5p	rno-miR-434-5p
471	20506531	rno-miR-434-3p	MIMAT0005315	0.0439553	up	0.733741	5.12582	5.08187	5.03069	5.10445	5.28272	5.03387	4.93221	5.23916	MIMAT0005315_st	6:134186309-134186330 (+)	22	UUUGAACCAUCACUCGACUCCU	rno-miR-434-3p	rno-miR-434-3p
472	20506532	rno-miR-455-5p	MIMAT0005316	0.393654	up	0.0757065	4.75352	4.35986	4.37488	4.66222	4.20976	4.56447	4.49495	5.03387	MIMAT0005316_st	5:80239857-80239878 (+)	22	UAUGUGCCUUUGGACUACAUCG	rno-miR-455-5p	rno-miR-455-5p
473	20506533	rno-miR-455-3p	MIMAT0017308	-0.184538	down	0.509518	1.07542	1.25995	1.35781	0.941873	1.20268	0.724283	1.21937	1.56009	MIMAT0017308_st	5:80239894-80239915 (+)	22	GCAGUCCACGGGCAUAUACACU	rno-miR-455-3p	rno-miR-455-3p
474	20506534	rno-miR-463-5p	MIMAT0017309	-0.134438	down	0.558413	4.03624	4.17068	4.38654	4.13008	3.80811	4.15361	4.31739	3.82504	MIMAT0017309_st	X:152844354-152844374 (-)	21	UACCUAAUUUGUUGUCCAUCA	rno-miR-463-5p	rno-miR-463-5p
475	20506535	rno-miR-463-3p	MIMAT0005317	0.166387	up	0.0343547	0.930784	0.764397	0.830283	0.936503	0.745335	0.997723	0.717573	0.858127	MIMAT0005317_st	X:152844316-152844337 (-)	22	UGAUAGACGCCAAUUUGGGUAG	rno-miR-463-3p	rno-miR-463-3p
476	20506536	rno-miR-471-5p	MIMAT0005318	-0.252361	down	0.730773	4.0813	4.33366	4.13681	4.82919	4.67422	4.65358	4.18994	2.76112	MIMAT0005318_st	X:152840426-152840447 (-)	22	UACGUAGUAUAGUGCUUUUCAC	rno-miR-471-5p	rno-miR-471-5p
477	20506537	rno-miR-471-3p	MIMAT0017310	-0.767753	down	0.245747	3.73226	4.50001	4.91316	2.70289	4.31026	4.43289	4.27661	4.06101	MIMAT0017310_st	X:152840393-152840412 (-)	20	UGAAAGGUGCCAUACUAUGU	rno-miR-471-3p	rno-miR-471-3p
478	20506538	rno-miR-484	MIMAT0005319	-0.0229816	down	0.742316	0.771002	0.793984	0.882987	0.700247	0.717573	0.761168	0.781392	0.851592	MIMAT0005319_st	10:826415-826436 (-)	22	UCAGGCUCAGUCCCCUCCCGAU	rno-miR-484	rno-miR-484
479	20506539	rno-miR-495	MIMAT0005320	0.410248	up	0.413769	1.73401	1.32376	1.26283	0.90788	1.17461	2.39465	1.53385	1.8995	MIMAT0005320_st	6:134399266-134399287 (+)	22	AAACAAACAUGGUGCACUUCUU	rno-miR-495	rno-miR-495
480	20506540	rno-miR-500-5p	MIMAT0017311	0.0968112	up	0.0195652	0.81252	0.715709	0.728494	0.798043	0.724283	0.858127	0.69435	0.781392	MIMAT0017311_st	X:27334619-27334642 (+)	24	AAUCCUUGCUAUCUGGGUGCUUAG	rno-miR-500-5p	rno-miR-500-5p
481	20506541	rno-miR-500-3p	MIMAT0005321	0.102076	up	0.624615	0.807439	0.705363	0.626742	0.751492	0.758037	1.15854	0.731312	0.51228	MIMAT0005321_st	X:27334657-27334678 (+)	22	AAUGCACCUGGGCAAGGGUUCA	rno-miR-500-3p	rno-miR-500-3p
482	20506542	rno-miR-532-5p	MIMAT0005322	-0.162128	down	0.633653	1.10936	1.27148	1.18083	1.08842	0.779005	1.0811	1.85461	1.15854	MIMAT0005322_st	X:27323157-27323178 (+)	22	CAUGCCUUGAGUGUAGGACUGU	rno-miR-532-5p	rno-miR-532-5p
483	20506543	rno-miR-532-3p	MIMAT0005323	-0.146227	down	0.697149	1.07707	1.2233	1.75101	0.929095	1.14967	0.827052	0.769213	1.47507	MIMAT0005323_st	X:27323194-27323215 (+)	22	CCUCCCACACCCAAGGCUUGCA	rno-miR-532-3p	rno-miR-532-3p
484	20506544	rno-miR-598-5p	MIMAT0005324	0.234141	up	0.312359	3.49402	3.25988	3.42534	3.36255	2.95158	3.75696	3.40271	3.36255	MIMAT0005324_st	15:42988365-42988386 (+)	22	GCGGUGAUGCCGAUGGUGCGAG	rno-miR-598-5p	rno-miR-598-5p
485	20506545	rno-miR-598-3p	MIMAT0005325	-0.0588622	down	0.608825	1.04067	1.09953	1.26649	0.97887	1.03291	0.972782	0.999202	1.17037	MIMAT0005325_st	15:42988402-42988423 (+)	22	UACGUCAUCGUCGUCAUCGUUA	rno-miR-598-3p	rno-miR-598-3p
486	20506546	rno-miR-671	MIMAT0005326	-0.0280449	down	0.934836	1.47827	1.50632	1.8209	1.91348	1.58086	1.05683	1.11719	1.4645	MIMAT0005326_st	4:5960220-5960240 (-)	21	UCCGGUUCUCAGGGCUCCACC	rno-miR-671	rno-miR-671
487	20506547	rno-miR-672-5p	MIMAT0005327	0.131465	up	0.356341	0.666871	0.535406	0.449583	0.540623	0.4113	0.680985	0.745335	0.779005	MIMAT0005327_st	X:92107955-92107977 (-)	23	UGAGGUUGGUGUACUGUGUGUGA	rno-miR-672-5p	rno-miR-672-5p
488	20506548	rno-miR-672-3p	MIMAT0017312	0.1268	up	0.457601	1.16585	1.03905	0.965267	0.959407	0.892039	1.22853	1.25983	1.3096	MIMAT0017312_st	X:92107919-92107939 (-)	21	ACACACAGUCGCCAUCUUCGA	rno-miR-672-3p	rno-miR-672-3p
489	20506549	rno-miR-673-5p	MIMAT0005328	0.385377	up	0.472831	2.20162	1.81624	1.29066	1.68094	2.54692	2.17667	1.61115	2.74724	MIMAT0005328_st	6:134149787-134149808 (+)	22	CUCACAGCUCCGGUCCUUGGAG	rno-miR-673-5p	rno-miR-673-5p
490	20506550	rno-miR-673-3p	MIMAT0017313	-0.101852	down	0.791802	3.73219	3.83404	3.62254	4.20976	3.93979	3.92494	3.93979	3.06185	MIMAT0017313_st	6:134149827-134149848 (+)	22	UCCGGGACUGAGUUCUGUGCAC	rno-miR-673-3p	rno-miR-673-3p
491	20506551	rno-miR-674-5p	MIMAT0005329	0.0497848	up	0.835069	0.909391	0.859607	1.03773	0.608944	0.589518	1.22204	0.951575	0.897188	MIMAT0005329_st	3:103253467-103253488 (+)	22	GCACUGAGAUGGGAGUGGUGUA	rno-miR-674-5p	rno-miR-674-5p
492	20506552	rno-miR-674-3p	MIMAT0005330	-0.192177	down	0.67794	1.29883	1.49101	2.19759	1.51928	0.946848	1.5156	1.32859	0.86162	MIMAT0005330_st	3:103253502-103253523 (+)	22	CACAGCUCCCAUCUCAGAACAA	rno-miR-674-3p	rno-miR-674-3p
493	20506553	rno-miR-708-5p	MIMAT0005331	0.772536	up	0.0427775	2.28683	1.5143	2.00764	2.17667	1.39714	2.33713	1.13812	2.3467	MIMAT0005331_st	1:153476679-153476701 (+)	23	AAGGAGCUUACAAUCUAGCUGGG	rno-miR-708-5p	rno-miR-708-5p
494	20506554	rno-miR-708-3p	MIMAT0005332	0.0989039	up	0.844268	1.9376	1.83869	1.40684	1.81549	2.50853	2.55659	1.60071	1.44071	MIMAT0005332_st	1:153476725-153476746 (+)	22	CAACUAGACUGUGAGCUUCUAG	rno-miR-708-3p	rno-miR-708-3p
495	20506555	rno-miR-742-5p	MIMAT0017314	0.267291	up	0.0319827	1.03316	0.76587	0.69435	0.9929	0.700247	0.981067	0.903013	1.12552	MIMAT0017314_st	X:152829315-152829335 (-)	21	UACUCACAUGGUUGCUAAUCA	rno-miR-742-5p	rno-miR-742-5p
496	20506556	rno-miR-742-3p	MIMAT0005333	-0.2472	down	0.23145	1.25588	1.50308	1.58647	1.12244	1.71353	1.42316	1.20924	1.22204	MIMAT0005333_st	X:152829279-152829300 (-)	22	GAAAGCCACCAUGUUGGGUAAA	rno-miR-742-3p	rno-miR-742-3p
497	20506557	rno-miR-743a-5p	MIMAT0017315	-0.17625	down	0.468427	0.739833	0.916083	0.837995	0.922078	0.615038	0.628742	1.29522	0.668678	MIMAT0017315_st	X:152821830-152821851 (-)	22	UAUUCAGAUUGGUGCCUGUCAU	rno-miR-743a-5p	rno-miR-743a-5p
498	20506558	rno-miR-743a-3p	MIMAT0005334	0.238564	up	0.361451	1.74268	1.50412	1.17201	2.05187	1.58934	1.60071	1.75101	1.57547	MIMAT0005334_st	X:152821796-152821817 (-)	22	GAAAGACGCCAAACUGGGUAGA	rno-miR-743a-3p	rno-miR-743a-3p
499	20506559	rno-miR-758-5p	MIMAT0017316	-0.559423	down	0.376709	2.31761	2.87703	2.64425	1.63458	2.6243	3.31062	3.36255	2.00764	MIMAT0017316_st	6:134392007-134392027 (+)	21	UGGUUGACCAGAGAGCACACG	rno-miR-758-5p	rno-miR-758-5p
500	20506560	rno-miR-758-3p	MIMAT0005335	0.062619	up	0.865001	1.38138	1.31876	1.58647	1.78403	1.48682	1.4828	0.882987	0.8773	MIMAT0005335_st	6:134392042-134392063 (+)	22	UUUGUGACCUGGUCCACUAACC	rno-miR-758-3p	rno-miR-758-3p
501	20506561	rno-miR-760-5p	MIMAT0005336	-0.153948	down	0.317035	0.698608	0.852557	0.849623	0.852743	0.959407	0.781392	0.74864	0.46169	MIMAT0005336_st	2:218940616-218940637 (-)	22	CCCCUCAGGCCACCAGAGCCCG	rno-miR-760-5p	rno-miR-760-5p
502	20506562	rno-miR-760-3p	MIMAT0005337	0.372082	up	0.385805	2.19797	1.82589	1.72261	1.98359	1.79442	1.68094	1.96063	2.92938	MIMAT0005337_st	2:218940581-218940600 (-)	20	CGGCUCUGGGUCUGUGGGGA	rno-miR-760-3p	rno-miR-760-3p
503	20506563	rno-miR-770-5p	MIMAT0005338	-0.304059	down	0.201346	0.585538	0.889597	0.70923	0.300417	1.11937	0.60973	0.840192	0.846468	MIMAT0005338_st	6:134141371-134141392 (+)	22	AGCACCACGUGUCUGGGCCACG	rno-miR-770-5p	rno-miR-770-5p
504	20506564	rno-miR-770-3p	MIMAT0017317	-0.255237	down	0.440879	1.12945	1.38469	1.52896	0.75322	1.41233	1.68607	1.21277	0.949062	MIMAT0017317_st	6:134141406-134141422 (+)	17	GUGGGCCUGACGUGGAG	rno-miR-770-3p	rno-miR-770-3p
505	20506565	rno-miR-873-5p	MIMAT0005339	0.217157	up	0.656371	5.99832	5.78116	6.20974	6.70466	5.88053	5.582	5.25321	5.70829	MIMAT0005339_st	5:53454961-53454981 (-)	21	GCAGGAACUUGUGAGUCUCCU	rno-miR-873-5p	rno-miR-873-5p
506	20506566	rno-miR-873-3p	MIMAT0017318	0.0802348	up	0.877506	7.13959	7.05936	7.80549	7.74341	6.62312	6.9825	6.74946	6.69286	MIMAT0017318_st	5:53454925-53454945 (-)	21	GAGACUGACAAGUUCCCGGGA	rno-miR-873-3p	rno-miR-873-3p
507	20506567	rno-miR-92b-5p	MIMAT0017319	0.0182266	up	0.984294	3.48663	3.4684	3.27538	4.52623	3.84895	4.13008	3.28088	1.80358	MIMAT0017319_st	2:181395475-181395498 (-)	24	AGGGACGGGACGCGGUGCAGUGUU	rno-miR-92b-5p	rno-miR-92b-5p
508	20506568	rno-miR-92b-3p	MIMAT0005340	-0.0902767	down	0.696499	0.524771	0.615048	0.622648	0.704922	0.922078	0.568975	0.300417	0.300417	MIMAT0005340_st	2:181395436-181395457 (-)	22	UAUUGCACUCGUCCCGGCCUCC	rno-miR-92b-3p	rno-miR-92b-3p
509	20506569	rno-miR-488-5p	MIMAT0017320	0.139329	up	0.241498	0.9273	0.787971	0.662122	0.827052	0.8773	0.873745	0.824492	1.0811	MIMAT0017320_st	13:73795112-73795132 (+)	21	CCCAGAUAAUGGCACUCUCAA	rno-miR-488-5p	rno-miR-488-5p
510	20506570	rno-miR-488-3p	MIMAT0005341	-0.229351	down	0.46114	1.43858	1.66793	1.39714	0.975165	1.83171	1.52508	1.77493	1.81549	MIMAT0005341_st	13:73795150-73795170 (+)	21	UUGAAAGGCUGUUUCUUGGUC	rno-miR-488-3p	rno-miR-488-3p
511	20506571	rno-miR-652-5p	MIMAT0017321	-0.02319	down	0.931576	1.1044	1.12759	1.49173	0.988633	1.21277	1.05166	0.678267	1.27291	MIMAT0017321_st	X:35821373-35821395 (-)	23	ACAACCCUAGGAGGGGGUGCCAU	rno-miR-652-5p	rno-miR-652-5p
512	20506572	rno-miR-652-3p	MIMAT0005342	0.239495	up	0.126925	1.83718	1.59769	1.75825	1.80358	1.36149	1.80846	1.67332	1.8995	MIMAT0005342_st	X:35821334-35821354 (-)	21	AAUGGCGCCACUAGGGUUGUG	rno-miR-652-3p	rno-miR-652-3p
513	20506804	rno-miR-146b-5p	MIMAT0005595	-0.054475	down	0.849349	12.1695	12.224	12.224	12.6056	12.224	12.224	12.224	11.6789	MIMAT0005595_st	1:251558061-251558084 (+)	24	UGAGAACUGAAUUCCAUAGGCUGU	rno-miR-146b-5p	rno-miR-146b-5p
514	20506805	rno-miR-146b-3p	MIMAT0017334	-0.152329	down	0.643804	3.99736	4.14969	3.97166	4.35378	3.91295	4.05175	4.56447	3.58656	MIMAT0017334_st	1:251558101-251558121 (+)	21	CCUAGGGACUCAGUUCUGGUG	rno-miR-146b-3p	rno-miR-146b-3p
515	20506806	rno-miR-551b-5p	MIMAT0017335	0.132414	up	0.654113	0.787448	0.655033	0.300417	0.644968	0.840192	0.518768	0.824492	1.19861	MIMAT0017335_st	2:114095895-114095917 (+)	23	GAAAUCAAGCUUGGGUGAGACCU	rno-miR-551b-5p	rno-miR-551b-5p
516	20506807	rno-miR-551b-3p	MIMAT0005596	0.181088	up	0.523749	1.35688	1.17579	1.15854	1.75825	1.22853	1.43737	1.1403	0.875017	MIMAT0005596_st	2:114095933-114095955 (+)	23	GGCGACCCAUACUUGGUUUCAGU	rno-miR-551b-3p	rno-miR-551b-3p
517	20513715	rno-miR-202-5p	MIMAT0012822	0.232363	up	0.702933	7.88276	7.6504	8.18649	7.08419	7.69489	7.86624	7.06981	8.69785	MIMAT0012822_st	1:199758176-199758194 (-)	19	UUCCUAUGCAUAUACUUCU	rno-miR-202-5p	rno-miR-202-5p
518	20513716	rno-miR-202-3p	MIMAT0017355	0.347977	up	0.394189	2.69876	2.35078	2.78976	2.25708	2.2475	3.22774	2.01508	2.61145	MIMAT0017355_st	1:199758138-199758158 (-)	21	AGAGGUAUAGCGCAUGGGAAA	rno-miR-202-3p	rno-miR-202-3p
519	20513717	rno-miR-490-5p	MIMAT0017356	0.149027	up	0.697978	7.29906	7.15003	7.57812	7.54272	7.06981	7.60498	6.80215	6.74946	MIMAT0017356_st	4:63815408-63815427 (+)	20	CCAUGGAUCUCCAGGUGGGU	rno-miR-490-5p	rno-miR-490-5p
520	20513718	rno-miR-490-3p	MIMAT0012823	-0.0941814	down	0.825677	3.65547	3.74965	3.84279	3.26883	4.302	3.91295	3.10415	3.78463	MIMAT0012823_st	4:63815445-63815466 (+)	22	CAACCUGGAGGACUCCAUGCUG	rno-miR-490-3p	rno-miR-490-3p
521	20513719	rno-miR-105	MIMAT0012825	-0.519456	down	0.0295299	2.03149	2.55095	2.2756	1.95442	2.60505	1.99664	2.77218	2.14341	MIMAT0012825_st	X:158570125-158570146 (-)	22	CAAGUGCUCAGAUGUCUGUGGU	rno-miR-105	rno-miR-105
522	20513720	rno-miR-1224	MIMAT0012827	0.119147	up	0.610659	1.33583	1.21668	1.00744	1.10041	1.51138	1.62529	1.13122	1.28179	MIMAT0012827_st	11:82536327-82536347 (-)	21	GUGAGGACUGGGGAGGUGGAG	rno-miR-1224	rno-miR-1224
523	20513721	rno-miR-362-5p	MIMAT0012828	-0.0461512	down	0.720683	6.23713	6.28328	6.27173	6.38337	6.43014	6.24971	6.14797	6.07831	MIMAT0012828_st	X:27330451-27330474 (+)	24	AAUCCUUGGAACCUAGGUGUGAAU	rno-miR-362-5p	rno-miR-362-5p
524	20513722	rno-miR-362-3p	MIMAT0017357	-0.116384	down	0.626401	6.25425	6.37063	6.47883	6.64443	6.24971	6.19765	6.38337	5.92066	MIMAT0017357_st	X:27330488-27330509 (+)	22	AACACACCUGUUCAAGGAUUCA	rno-miR-362-3p	rno-miR-362-3p
525	20513723	rno-miR-511-5p	MIMAT0012829	-0.00790838	down	0.971904	1.25402	1.26193	1.34299	1.49173	1.08842	1.39714	1.35439	0.873202	MIMAT0012829_st	17:88441502-88441522 (+)	21	CAUGCCUUUUGCUCUGCACUC	rno-miR-511-5p	rno-miR-511-5p
526	20513724	rno-miR-511-3p	MIMAT0017358	0.0612933	up	0.79494	0.929587	0.868294	0.785492	1.08538	0.638558	1.07349	1.18083	0.629897	MIMAT0017358_st	17:88441541-88441561 (+)	21	AAUGUGUAGCAAAAGACAGGA	rno-miR-511-3p	rno-miR-511-3p
527	20513725	rno-miR-504	MIMAT0012830	-0.374161	down	0.56844	1.32042	1.69458	2.60505	0.743198	1.51928	1.98359	0.959407	1.23447	MIMAT0012830_st	X:144243878-144243899 (-)	22	AGACCCUGGUCUGCACUCUGUC	rno-miR-504	rno-miR-504
528	20513726	rno-miR-544-5p	MIMAT0017359	0.665911	up	0.0120664	1.5703	0.90439	0.765033	1.51138	0.940695	1.37235	1.00744	1.82716	MIMAT0017359_st	6:134410265-134410284 (+)	20	CUUGUUAAAAAGCAGAUUCU	rno-miR-544-5p	rno-miR-544-5p
529	20513727	rno-miR-544-3p	MIMAT0012831	-0.154895	down	0.356464	0.87264	1.02754	0.935314	1.01756	1.25092	0.913327	0.89637	0.68703	MIMAT0012831_st	6:134410300-134410320 (+)	21	AUUCUGCAUUUUUAGCAAGCU	rno-miR-544-3p	rno-miR-544-3p
530	20513728	rno-miR-568	MIMAT0012832	0.28215	up	0.262893	1.83648	1.55433	1.70448	2.00764	1.4645	2.07001	1.49401	1.4318	MIMAT0012832_st	11:58644001-58644020 (-)	20	AUGUAUAAAUGUAUACACAC	rno-miR-568	rno-miR-568
531	20513729	rno-miR-582-5p	MIMAT0012833	0.141914	up	0.584118	1.56526	1.42334	1.27764	1.5615	1.35781	1.93567	1.63458	1.19861	MIMAT0012833_st	2:40714126-40714147 (+)	22	UACAGUUGUUCAACCAGUUACU	rno-miR-582-5p	rno-miR-582-5p
532	20513730	rno-miR-582-3p	MIMAT0017360	-0.293829	down	0.304775	1.04753	1.34136	1.20924	1.34299	1.0811	0.852743	1.73372	0.946848	MIMAT0017360_st	2:40714163-40714184 (+)	22	AACCUGUUGAACAACUGAACCC	rno-miR-582-3p	rno-miR-582-3p
533	20513731	rno-miR-592	MIMAT0012834	0.156345	up	0.41605	0.713324	0.55698	0.496347	1.04823	0.540623	0.53076	0.633969	0.560985	MIMAT0012834_st	4:54685639-54685661 (-)	23	AUUGUGUCAAUAUGCGAUGAUGU	rno-miR-592	rno-miR-592
534	20513732	rno-miR-615	MIMAT0012835	-0.119897	down	0.375677	2.47001	2.58991	2.6243	2.61145	2.46184	2.2756	2.68358	2.52299	MIMAT0012835_st	7:141778246-141778267 (+)	22	GGGGGUCCCCGGUGCUCGGAUC	rno-miR-615	rno-miR-615
535	20513733	rno-miR-628	MIMAT0012836	-0.496305	down	0.244911	1.2221	1.71841	1.12244	1.09183	1.80631	1.01298	2.22647	1.5615	MIMAT0012836_st	8:77755499-77755520 (+)	22	AUGCUGACAUAUUUACGAGAGG	rno-miR-628	rno-miR-628
536	20513734	rno-miR-632	MIMAT0012837	-0.0920932	down	0.681799	0.922893	1.01499	1.3336	1.14431	0.83272	0.680985	0.878637	0.94338	MIMAT0012837_st	10:68613414-68613432 (+)	19	GUGUCUGUUUCCUGCCGGA	rno-miR-632	rno-miR-632
537	20513735	rno-miR-653-5p	MIMAT0012838	-0.10174	down	0.760621	0.963049	1.06479	1.321	0.798043	1.2394	1.40684	0.633969	0.684258	MIMAT0012838_st	4:28517676-28517696 (-)	21	UUGAAACAUUCUCUACUGAAC	rno-miR-653-5p	rno-miR-653-5p
538	20513736	rno-miR-653-3p	MIMAT0017361	-0.0770106	down	0.661068	0.616795	0.693806	0.959407	0.496347	0.60973	0.560985	0.51228	0.793053	MIMAT0017361_st	4:28517638-28517659 (-)	22	UUCACUGGGGUUUGUUUCACUA	rno-miR-653-3p	rno-miR-653-3p
539	20513737	rno-miR-668	MIMAT0012839	-0.344709	down	0.355502	2.39272	2.73743	2.86428	1.85461	2.85055	2.40336	2.49744	2.92017	MIMAT0012839_st	6:134416268-134416291 (+)	24	UGUCACUCGGCUCGGCCCACUACC	rno-miR-668	rno-miR-668
540	20513738	rno-miR-802-5p	MIMAT0012840	0.258327	up	0.63308	1.94712	1.68879	1.28741	2.30644	1.33824	2.2475	2.44071	1.28741	MIMAT0012840_st	11:33538482-33538502 (+)	21	UCAGUAACAAAGAUUCAUCCU	rno-miR-802-5p	rno-miR-802-5p
541	20513739	rno-miR-802-3p	MIMAT0017362	-0.0188841	down	0.933456	4.62376	4.64265	4.72169	4.40312	4.90425	4.67422	4.302	4.79394	MIMAT0017362_st	11:33538520-33538542 (+)	23	ACGGAGAGUCUUUGUCACUCAGU	rno-miR-802-3p	rno-miR-802-3p
542	20513740	rno-miR-675-5p	MIMAT0012841	-0.0155933	down	0.903996	0.728473	0.744067	0.953792	0.728395	0.668678	0.830283	0.60973	0.626742	MIMAT0012841_st	1:202824550-202824571 (-)	22	UGGUGCGGAAAGGGCCCACAGU	rno-miR-675-5p	rno-miR-675-5p
543	20513741	rno-miR-675-3p	MIMAT0017363	-0.169075	down	0.512711	0.649037	0.818112	0.644968	0.70923	1.10445	0.300417	0.704922	0.937465	MIMAT0017363_st	1:202824516-202824536 (-)	21	UGUAUGCCCUAACCGCUCAGU	rno-miR-675-3p	rno-miR-675-3p
544	20513742	rno-miR-875	MIMAT0012842	-0.0690651	down	0.850686	3.90477	3.97384	3.78463	3.67544	3.55883	3.84895	4.57806	4.18994	MIMAT0012842_st	7:71189283-71189304 (-)	22	UAUACCUCAGUUUUAUCAGGUG	rno-miR-875	rno-miR-875
545	20513743	rno-miR-876	MIMAT0012843	0.134821	up	0.6277	6.87978	6.74496	7.03516	6.62312	6.76957	7.24664	6.43014	6.76957	MIMAT0012843_st	5:53434926-53434947 (-)	22	UGGAUUUCUCUGUGAAUCACCA	rno-miR-876	rno-miR-876
546	20513744	rno-miR-665	MIMAT0012844	-0.0743621	down	0.831279	2.51214	2.5865	2.58804	2.12343	2.88146	3.05303	2.29	2.35995	MIMAT0012844_st	6:134177342-134177363 (+)	22	ACCAGGAGGCUGAGGUCCCUUA	rno-miR-665	rno-miR-665
547	20513745	rno-miR-935	MIMAT0012845	0.25397	up	0.471874	1.2516	0.997628	0.540623	1.49739	1.45936	0.903013	0.9929	1.35439	MIMAT0012845_st	1:64068780-64068802 (-)	23	CCAGUUACCGCUUCCGCUACCGC	rno-miR-935	rno-miR-935
548	20513746	rno-miR-201-5p	MIMAT0012846	0.116063	up	0.730251	4.47786	4.3618	3.88954	4.41445	4.74959	4.18994	4.44626	4.82919	MIMAT0012846_st	X:154169190-154169209 (-)	20	CACUCAGUAAGGCAUUGUUC	rno-miR-201-5p	rno-miR-201-5p
549	20513747	rno-miR-201-3p	MIMAT0017364	0.108874	up	0.737405	0.993779	0.884905	0.771157	0.622648	0.843177	1.56978	1.04038	0.78891	MIMAT0017364_st	X:154169153-154169174 (-)	22	UGAACAGCGCCUUUCUGUGUAG	rno-miR-201-3p	rno-miR-201-3p
550	20513748	rno-miR-293-5p	MIMAT0012847	0.534056	up	0.333209	6.00804	5.47399	4.70087	6.59194	5.90238	5.67339	5.81871	5.7588	MIMAT0012847_st	1:64273372-64273392 (-)	21	ACUCAAACUGUGUGACACUUU	rno-miR-293-5p	rno-miR-293-5p
551	20513749	rno-miR-293-3p	MIMAT0017365	-0.0349405	down	0.603208	0.913267	0.948208	0.880072	0.999202	0.949062	0.90788	1.01549	0.83272	MIMAT0017365_st	1:64273335-64273356 (-)	22	AGUGCCGCAAAGUUUGCAGUGU	rno-miR-293-3p	rno-miR-293-3p
552	20513750	rno-miR-294	MIMAT0012848	0.136795	up	0.264765	1.13327	0.996476	0.922078	1.32859	1.03773	1.06121	1.02962	1.01001	MIMAT0012848_st	1:64273008-64273028 (-)	21	CUCAAAAUGGAGGCCCUAUCU	rno-miR-294	rno-miR-294
553	20513751	rno-miR-295-5p	MIMAT0012849	-0.219426	down	0.641104	2.24614	2.46557	2.49744	2.55659	3.01746	2.50853	1.88181	1.67332	MIMAT0012849_st	1:64272890-64272912 (-) // 1:73183816-73183838 (+)	23	ACUCAAAUGUGGGGCACACUUCU	rno-miR-295-5p	rno-miR-295-5p
554	20513752	rno-miR-295-3p	MIMAT0017366	-0.35767	down	0.541503	2.94384	3.30152	3.15007	2.86428	3.18015	3.87966	3.57433	2.0876	MIMAT0017366_st	1:64272854-64272875 (-) // 1:73183853-73183874 (+)	22	AAGUGCUACUACUUUUGGGUGU	rno-miR-295-3p	rno-miR-295-3p
555	20513753	rno-miR-465-5p	MIMAT0012850	-0.444281	down	0.404565	4.86951	5.31379	5.10445	5.35529	5.45872	5.31346	5.37821	3.93979	MIMAT0012850_st	X:152868926-152868947 (-)	22	UAUUUAGAACGGUGCUGGUGUG	rno-miR-465-5p	rno-miR-465-5p
556	20513754	rno-miR-465-3p	MIMAT0017367	0.373552	up	0.101551	1.04511	0.671559	0.728494	1.01756	0.46169	1.29846	0.824492	0.819307	MIMAT0017367_st	X:152868892-152868913 (-)	22	UGAUCAGUGCCUUUCUGAGUAG	rno-miR-465-3p	rno-miR-465-3p
557	20513755	rno-miR-547-5p	MIMAT0017368	-0.231393	down	0.479597	1.4211	1.65249	1.8209	0.981067	1.88181	1.64766	1.25478	1.63458	MIMAT0017368_st	X:154169488-154169509 (-)	22	UCACUUCAGGAUGUACCACCCA	rno-miR-547-5p	rno-miR-547-5p
558	20513756	rno-miR-547-3p	MIMAT0012851	0.225982	up	0.775242	2.19508	1.9691	0.988633	2.6711	1.95442	1.25285	2.96425	2.6613	MIMAT0012851_st	X:154169450-154169471 (-)	22	AUUGGUACUUCUUUAAGUGAGA	rno-miR-547-3p	rno-miR-547-3p
559	20513757	rno-miR-667-5p	MIMAT0017369	0.0494616	up	0.902041	2.10456	2.0551	2.17667	2.78976	2.22647	1.66168	1.76216	1.86226	MIMAT0017369_st	6:134400514-134400537 (+)	24	CGGUGCUGGUGGAGCAGUGAGCAC	rno-miR-667-5p	rno-miR-667-5p
560	20513758	rno-miR-667-3p	MIMAT0012852	0.0532461	up	0.800256	0.998489	0.945243	1.22204	0.818125	0.860467	0.910848	0.75322	1.26649	MIMAT0012852_st	6:134400555-134400576 (+)	22	UGACACCUGCCACCCAGCCCAA	rno-miR-667-3p	rno-miR-667-3p
561	20513759	rno-miR-761	MIMAT0012853	-0.132368	down	0.497412	0.896379	1.02875	1.20376	0.972782	1.00241	1.11016	0.880072	0.606197	MIMAT0012853_st	5:130366432-130366453 (+)	22	GCAGCAGGGUGAAACUGACACA	rno-miR-761	rno-miR-761
562	20513760	rno-miR-764-5p	MIMAT0012854	0.144985	up	0.807075	3.07187	2.92688	2.37016	3.77507	3.08673	3.27642	3.32375	2.16411	MIMAT0012854_st	X:31207294-31207315 (-)	22	GGUGCUCACAUGUCCUCCUCCA	rno-miR-764-5p	rno-miR-764-5p
563	20513761	rno-miR-764-3p	MIMAT0017370	-0.351229	down	0.124503	0.668217	1.01945	0.851592	0.626742	1.28179	0.478792	0.924958	0.899118	MIMAT0017370_st	X:31207255-31207277 (-)	23	GAGGAGGCCAUAGUGGCAACUGU	rno-miR-764-3p	rno-miR-764-3p
564	20513762	rno-miR-666-5p	MIMAT0012855	0.198123	up	0.120579	0.949082	0.750959	0.706217	0.899118	0.785492	0.810012	0.761168	1.13812	MIMAT0012855_st	6:134397039-134397058 (+)	20	AGCGGGCACGGCUGUGAGAG	rno-miR-666-5p	rno-miR-666-5p
565	20513763	rno-miR-666-3p	MIMAT0017371	-0.100472	down	0.571149	0.818583	0.919054	0.89637	0.74864	1.13651	1.03587	0.724283	0.671237	MIMAT0017371_st	6:134397076-134397098 (+)	23	GGCUGCAGCGUGAUCGCCUGCUC	rno-miR-666-3p	rno-miR-666-3p
566	20513764	rno-miR-759	MIMAT0012856	-0.660757	down	0.0579185	1.15638	1.81714	1.8209	1.24792	2.17667	1.33824	1.45384	0.882987	MIMAT0012856_st	15:60997699-60997720 (+)	22	GCAGAGUGCAAACAAUUUUGAC	rno-miR-759	rno-miR-759
567	20513765	rno-miR-678	MIMAT0012857	0.092815	up	0.653034	0.88944	0.796625	0.949062	1.21521	0.655322	0.819307	0.785492	0.633798	MIMAT0012857_st	20:12816888-12816909 (+)	22	GUCUCGGGGCAAGGACUGGAGG	rno-miR-678	rno-miR-678
568	20513766	rno-miR-711	MIMAT0012859	-0.0678261	down	0.638114	0.849554	0.91738	0.96696	1.00535	0.90788	0.589518	0.8773	0.953792	MIMAT0012859_st	8:113988210-113988231 (+)	22	GGGACCCUGGGAGAGAUGUAAG	rno-miR-711	rno-miR-711
569	20513767	rno-miR-496-5p	MIMAT0017372	0.135548	up	0.468094	3.92309	3.78754	3.91295	4.21639	3.70063	3.68134	3.74904	3.87153	MIMAT0017372_st	6:134420381-134420400 (+)	20	AGGUUGUCCAUGGUGUGUUC	rno-miR-496-5p	rno-miR-496-5p
570	20513768	rno-miR-496-3p	MIMAT0012860	-0.481882	down	0.199331	1.09658	1.57846	1.88181	1.47507	1.60266	1.20376	1.25092	0.610907	MIMAT0012860_st	6:134420416-134420436 (+)	21	AGUAUUACAUGGCCAAUCUCC	rno-miR-496-3p	rno-miR-496-3p
571	20517059	rno-miR-3541	MIMAT0017795	0.139989	up	0.671353	5.15213	5.01214	5.52797	4.91316	4.56447	5.32671	4.94399	5.21652	MIMAT0017795_st	2:181255623-181255640 (+)	18	UCCCUCCCCCUCACUGCA	rno-miR-3541	rno-miR-3541
572	20517060	rno-miR-3542	MIMAT0017796	0.04124	up	0.899996	5.57902	5.53778	5.77185	5.48246	5.64567	6.05878	5.19582	5.19582	MIMAT0017796_st	17:15151635-15151655 (+)	21	AAGGCUCUUCUUUCCUUGCAG	rno-miR-3542	rno-miR-3542
573	20517061	rno-miR-3543	MIMAT0017797	0.307928	up	0.145117	1.31807	1.01014	0.818125	1.43737	1.11719	1.47911	1.09511	1.03773	MIMAT0017797_st	6:134186309-134186331 (-)	23	CAGGAGUCGAGUGAUGGUUCAAA	rno-miR-3543	rno-miR-3543
574	20517062	rno-miR-3544	MIMAT0017798	0.30793	up	0.403128	1.93541	1.62748	1.30502	1.3687	1.87293	2.22647	1.70448	2.21105	MIMAT0017798_st	6:134176774-134176796 (-)	23	AACUCCUGCAUGACGCCGUUCCC	rno-miR-3544	rno-miR-3544
575	20517063	rno-miR-203b-5p	MIMAT0017799	-0.0810079	down	0.705365	3.8701	3.95111	4.03753	3.84242	4.22923	3.78463	3.58656	3.98324	MIMAT0017799_st	6:136932140-136932159 (-)	20	AGUGGUCCUAAACAUUUCAC	rno-miR-203b-5p	rno-miR-203b-5p
576	20517064	rno-miR-203b-3p	MIMAT0017800	0.185019	up	0.57328	8.31811	8.13309	8.53223	7.97831	8.0008	8.23685	7.86624	8.73916	MIMAT0017800_st	6:136932100-136932121 (-)	22	UUGAACUGUUAAGAACCACUGG	rno-miR-203b-3p	rno-miR-203b-3p
577	20517065	rno-miR-3546	MIMAT0017801	-0.148059	down	0.249326	0.600963	0.749023	0.755657	0.560985	0.769213	0.806637	0.722198	0.435268	MIMAT0017801_st	15:33052006-33052027 (+)	22	AUAACCCGGGCCAAAAGCUCAC	rno-miR-3546	rno-miR-3546
578	20517066	rno-miR-3547	MIMAT0017802	0.218955	up	0.198533	1.53351	1.31455	1.52508	1.48682	1.3499	1.63458	1.06868	1.47911	MIMAT0017802_st	10:14493074-14493096 (-)	23	UGAGCACCACCCCUCUCUCAGAU	rno-miR-3547	rno-miR-3547
579	20517067	rno-miR-449c-5p	MIMAT0017803	0.209139	up	0.331953	1.34609	1.13695	1.37235	1.56263	1.09511	1.07849	0.94338	1.39714	MIMAT0017803_st	2:44416757-44416777 (+)	21	AGGCAGUGCAUUGCUAGCUGG	rno-miR-449c-5p	rno-miR-449c-5p
580	20517068	rno-miR-449c-3p	MIMAT0017804	0.313645	up	0.392997	2.89321	2.57957	2.52299	2.29	2.82483	3.18015	2.39088	3.20949	MIMAT0017804_st	2:44416782-44416798 (+)	17	UAGAACUUCGUCCCAAC	rno-miR-449c-3p	rno-miR-449c-3p
581	20517069	rno-miR-3085	MIMAT0017805	-0.320781	down	0.560373	1.76349	2.08427	2.92938	1.79442	1.49173	1.29846	1.83171	2.19759	MIMAT0017805_st	1:248574625-248574645 (+)	21	UCUGGCUGCUAUGGCCCCCUC	rno-miR-3085	rno-miR-3085
582	20517070	rno-miR-3548	MIMAT0017806	0.0495071	up	0.689412	0.983107	0.933599	1.10445	1.05683	0.755657	0.873745	0.940695	1.01874	MIMAT0017806_st	5:172898274-172898295 (+)	22	CAGCACUGUCCGGUAAGAUGCC	rno-miR-3548	rno-miR-3548
583	20517071	rno-miR-3549	MIMAT0017807	-0.0266538	down	0.952266	4.23529	4.26194	4.6932	3.55883	4.18994	4.72169	3.90269	4.42535	MIMAT0017807_st	10:65901068-65901086 (-)	19	AUCUUGCCCGCAAAGACCC	rno-miR-3549	rno-miR-3549
584	20517072	rno-miR-3550	MIMAT0017808	-0.0977822	down	0.58325	0.929247	1.02703	0.834985	0.849623	1.3096	1.08538	0.936503	0.852743	MIMAT0017808_st	19:24885006-24885026 (+)	21	CCGAGCCCAUCCCUGCCCUAG	rno-miR-3550	rno-miR-3550
585	20517073	rno-miR-3551-5p	MIMAT0017809	-0.962476	down	0.148807	1.96795	2.93043	3.59095	2.19759	2.49744	1.14967	2.70289	2.55659	MIMAT0017809_st	X:152841145-152841168 (-)	24	UCUUCACCAUGGUGUUUUUGACAU	rno-miR-3551-5p	rno-miR-3551-5p
586	20517074	rno-miR-3551-3p	MIMAT0017810	0.431738	up	0.488358	3.83549	3.40375	2.32912	4.01702	4.2008	3.80811	3.68134	3.68134	MIMAT0017810_st	X:152841113-152841135 (-)	23	UGAAAUUCACCAUGGUGGGUAAA	rno-miR-3551-3p	rno-miR-3551-3p
587	20517075	rno-miR-344b-5p	MIMAT0017811	0.257281	up	0.411633	9.73093	9.47365	9.83634	9.32012	9.20783	9.86959	9.37677	10.0031	MIMAT0017811_st	1:115312138-115312159 (-) // 1:115319520-115319541 (-) // 1:115328376-115328397 (-)	22	AGUCAGGCUGCUGGUUAUAUUC	rno-miR-344b-5p	rno-miR-344b-5p
588	20517076	rno-miR-344b-2-3p	MIMAT0017812	-0.0634463	down	0.909643	1.21249	1.27594	0.997723	0.391072	1.52508	1.12244	1.30502	2.12397	MIMAT0017812_st	1:115312097-115312118 (-) // 1:115328335-115328356 (-)	22	GGUAUAACCAAAGCCCGACUGU	rno-miR-344b-2-3p	rno-miR-344b-2-3p
589	20517077	rno-miR-3552	MIMAT0017813	-0.192303	down	0.648209	3.81371	4.00602	3.85649	4.15361	4.29003	3.08673	3.87153	4.2008	MIMAT0017813_st	X:31209179-31209199 (-)	21	AGGCUGCAGGCCCACUUCCCU	rno-miR-3552	rno-miR-3552
590	20517078	rno-miR-3553	MIMAT0017814	-0.0819907	down	0.745611	7.82071	7.9027	7.67782	8.0008	7.97831	7.40936	8.05197	8.05197	MIMAT0017814_st	4:57075155-57075177 (+)	23	CAGUGAAUUCUACCAGUGCCAUA	rno-miR-3553	rno-miR-3553
591	20517079	rno-miR-3074	MIMAT0017815	0.00658162	up	0.973595	0.883798	0.877216	0.92008	1.20924	0.706217	0.680985	1.00535	0.761168	MIMAT0017815_st	17:7351014-7351035 (+)	22	GAUAUCAGCUCAGUAGGCACCG	rno-miR-3074	rno-miR-3074
592	20517080	rno-miR-31b	MIMAT0017816	-0.12417	down	0.64648	0.860426	0.984596	1.21277	0.678267	1.14431	1.17461	0.5967	0.728395	MIMAT0017816_st	5:108497709-108497727 (+)	19	CUAUGCCAGCAUCUUGCCU	rno-miR-31b	rno-miR-31b
593	20517081	rno-miR-191b	MIMAT0017817	0.15606	up	0.504649	0.748947	0.592887	0.391072	0.882987	0.781392	0.391072	0.606197	0.972782	MIMAT0017817_st	8:113614415-113614435 (-)	21	GAACGAAAUCCAAGUGCAGCU	rno-miR-191b	rno-miR-191b
594	20517082	rno-miR-3556b	MIMAT0017818	-0.220238	down	0.423103	1.26953	1.48977	1.24792	1.21937	1.92096	1.09183	1.30042	1.49739	MIMAT0017818_st	13:110968101-110968120 (-)	20	ACCGAUUUCAAAUGGUGCUA	rno-miR-3556b	rno-miR-3556b
595	20517083	rno-miR-3557-5p	MIMAT0017819	0.203519	up	0.0960273	1.0388	0.83528	0.846468	0.875017	0.751492	1.13122	0.90788	1.11016	MIMAT0017819_st	18:57377807-57377828 (+)	22	GCCUUCUGACUCCAAGUCCAGU	rno-miR-3557-5p	rno-miR-3557-5p
596	20517084	rno-miR-3557-3p	MIMAT0017820	-0.112773	down	0.722672	1.83009	1.94286	1.58647	1.42118	2.30644	1.94511	1.93567	2.12397	MIMAT0017820_st	18:57377845-57377866 (+)	22	ACACAGGACCUGGAGUCAGGAG	rno-miR-3557-3p	rno-miR-3557-3p
597	20517085	rno-miR-3556a	MIMAT0017821	-0.292548	down	0.364097	5.29813	5.59068	5.19724	5.52797	5.78193	5.48246	5.79287	4.88397	MIMAT0017821_st	4:58107777-58107794 (+)	18	CGAUUUCAGAUGGUGCUA	rno-miR-3556a	rno-miR-3556a
598	20517086	rno-miR-291b	MIMAT0017822	-0.601712	down	0.307208	6.1655	6.76721	6.03306	6.39511	6.64443	6.38337	7.62415	5.71802	MIMAT0017822_st	1:64274075-64274096 (-)	22	AAAGUGCAUCCAUUUUGUUAGU	rno-miR-291b	rno-miR-291b
599	20517087	rno-miR-3596d	MIMAT0017823	-0.190445	down	0.692338	4.02684	4.21728	4.68602	3.42534	4.37488	4.22229	3.59095	4.43289	MIMAT0017823_st	17:22120142-22120161 (-)	20	CUAUACAAUCUACUACCUCA	rno-miR-3596d	rno-miR-3596d
600	20517088	rno-miR-466d	MIMAT0017824	0.170902	up	0.152774	0.736476	0.565574	0.51228	0.601298	0.496347	0.860467	0.688094	0.747663	MIMAT0017824_st	17:79266567-79266588 (-)	22	AUGUGUGUGUAUGUUCUUUUGU	rno-miR-466d	rno-miR-466d
601	20517089	rno-miR-3558-5p	MIMAT0017825	0.0517489	up	0.873584	3.09532	3.04357	2.85055	3.07067	3.20949	2.61145	3.07067	3.60384	MIMAT0017825_st	6:10867948-10867971 (+)	24	CCAUAGAAGUCAUCCCACAGUGCC	rno-miR-3558-5p	rno-miR-3558-5p
602	20517090	rno-miR-3558-3p	MIMAT0017826	0.157648	up	0.671554	5.38575	5.2281	4.8489	5.16202	5.67339	5.1147	5.16202	5.88053	MIMAT0017826_st	6:10867990-10868009 (+)	20	ACUGUGGAGGGUUUCUAUGU	rno-miR-3558-3p	rno-miR-3558-3p
603	20517091	rno-miR-3559-5p	MIMAT0017827	0.104877	up	0.891017	4.93041	4.82554	4.21639	5.80381	5.19867	3.66073	5.06155	5.32671	MIMAT0017827_st	X:92588285-92588306 (-)	22	UGACAGACUUAGUACUACAUGA	rno-miR-3559-5p	rno-miR-3559-5p
604	20517092	rno-miR-3559-3p	MIMAT0017828	0.305887	up	0.119415	6.82635	6.52047	6.69286	6.67434	6.55539	6.76957	6.31315	7.03516	MIMAT0017828_st	X:92588245-92588266 (-)	22	AUGUAGUACUGAGUCUGUCGUG	rno-miR-3559-3p	rno-miR-3559-3p
605	20517093	rno-miR-3560	MIMAT0017829	0.137621	up	0.299069	0.92408	0.78646	0.90788	1.01756	0.627007	0.765033	0.824492	0.989645	MIMAT0017829_st	X:27331201-27331222 (-)	22	CAAAUCCUUGCCCGGGUGCAUU	rno-miR-3560	rno-miR-3560
606	20517094	rno-miR-3561-5p	MIMAT0017830	0.132549	up	0.598051	1.28867	1.15612	1.14431	0.847775	1.06121	1.58086	1.26283	1.43737	MIMAT0017830_st	7:22452328-22452348 (-)	21	ACUGUGUCAAUCCAGGGUAGA	rno-miR-3561-5p	rno-miR-3561-5p
607	20517095	rno-miR-3561-3p	MIMAT0017831	-0.210417	down	0.520348	1.62737	1.83779	2.30644	1.68607	1.92096	1.60266	1.28598	1.59339	MIMAT0017831_st	7:22452284-22452304 (-)	21	UAUCCAGGGUAGACACUCAGA	rno-miR-3561-3p	rno-miR-3561-3p
608	20517096	rno-miR-3562	MIMAT0017832	-0.205235	down	0.148631	1.84355	2.04879	1.86226	1.82269	2.03661	1.80846	2.2475	1.8995	MIMAT0017832_st	10:109478654-109478675 (-)	22	UUGGGGCAGUGGCUGGAUGGGA	rno-miR-3562	rno-miR-3562
609	20517097	rno-miR-299b-5p	MIMAT0017833	-0.183786	down	0.294046	0.810673	0.994459	0.963665	0.862773	0.75322	0.75322	1.26649	0.816027	MIMAT0017833_st	6:134389859-134389878 (-)	20	CGGUUUACCGUCCCACAUAC	rno-miR-299b-5p	rno-miR-299b-5p
610	20517098	rno-miR-299b-3p	MIMAT0017834	-0.194056	down	0.434729	4.33931	4.53337	4.40312	3.94983	4.66222	4.39387	4.53475	4.67422	MIMAT0017834_st	6:134389830-134389846 (-)	17	UAUGUGGGACGGUAAAC	rno-miR-299b-3p	rno-miR-299b-3p
611	20517099	rno-miR-9b-5p	MIMAT0017835	-0.156287	down	0.513051	3.27095	3.42723	3.18015	3.53023	3.58875	2.92938	3.5128	3.35323	MIMAT0017835_st	1:135254187-135254205 (-) // 2:12259522-12259540 (+) // 2:180293063-180293081 (-)	19	UUCGGUUAUCUAGCUUUAU	rno-miR-9b-5p	rno-miR-9b-5p
612	20517100	rno-miR-9b-3p	MIMAT0017836	-0.0156557	down	0.934466	1.20199	1.21765	0.969798	1.01756	1.18914	1.32859	1.49401	1.25983	MIMAT0017836_st	1:135254151-135254168 (-) // 2:12259557-12259574 (+) // 2:180293027-180293044 (-)	18	AUACAGCUAGAUAACCAA	rno-miR-9b-3p	rno-miR-9b-3p
613	20517101	rno-miR-3564	MIMAT0017837	-0.440657	down	0.389555	1.40718	1.84784	1.44071	0.940695	2.47818	1.24425	1.62463	2.03661	MIMAT0017837_st	19:52056227-52056247 (+)	21	UGGGAAAUGCAAAGAGGGAAG	rno-miR-3564	rno-miR-3564
614	20517102	rno-miR-218b	MIMAT0017838	0.358856	up	0.0192145	2.47218	2.11332	2.03661	2.37762	2.13924	2.64425	2.16411	2.39465	MIMAT0017838_st	14:67642423-67642442 (+)	20	CAUGGUUAGAUCAAGCACAA	rno-miR-218b	rno-miR-218b
615	20517103	rno-miR-3065-5p	MIMAT0017839	-0.28589	down	0.280085	1.26134	1.54723	1.8209	1.4645	1.38009	0.89637	1.44071	1.42316	MIMAT0017839_st	10:109426995-109427014 (+)	20	UCAACAAAAUCACUGAUGCU	rno-miR-3065-5p	rno-miR-3065-5p
616	20517104	rno-miR-3065-3p	MIMAT0017840	0.278225	up	0.171762	1.09562	0.817391	0.810012	0.910848	0.731312	1.41233	0.910848	0.963665	MIMAT0017840_st	10:109427034-109427057 (+)	24	UCAGCACCAGGAUAUUGUUGGGGA	rno-miR-3065-3p	rno-miR-3065-3p
617	20517105	rno-miR-3566	MIMAT0017841	-0.139752	down	0.688986	1.48622	1.62597	1.69263	2.08986	1.44484	1.31715	1.74045	1.05166	MIMAT0017841_st	17:29445761-29445780 (+)	20	CUGCCUAACAAUGAACUACC	rno-miR-3566	rno-miR-3566
618	20517106	rno-miR-344a	MIMAT0017842	0.088577	up	0.770222	3.66726	3.57868	3.53023	4.08238	3.28088	3.38093	3.92494	3.53848	MIMAT0017842_st	1:115954631-115954649 (-)	19	UCAGGCUCCUGGCUAGAUU	rno-miR-344a	rno-miR-344a
619	20517107	rno-miR-126b	MIMAT0017843	0.771082	up	0.627826	4.48775	3.71666	6.39511	3.35323	2.00764	4.96644	2.74724	5.14357	MIMAT0017843_st	3:4768120-4768141 (-)	22	UACCAAAAGUAAUAAUGUGCUG	rno-miR-126b	rno-miR-126b
620	20517108	rno-miR-208b-5p	MIMAT0017844	-0.265715	down	0.441875	7.21037	7.47608	7.28515	7.60498	7.67782	7.38169	7.46528	6.64443	MIMAT0017844_st	15:33078082-33078101 (-)	20	AAGCUUUUUGCUCGCGUUAU	rno-miR-208b-5p	rno-miR-208b-5p
621	20517109	rno-miR-208b-3p	MIMAT0017845	0.170722	up	0.47297	7.93395	7.76323	7.38169	8.08013	7.92968	7.97831	7.97831	7.74341	MIMAT0017845_st	15:33078049-33078066 (-)	18	AUAAGACGAACAAAAGGU	rno-miR-208b-3p	rno-miR-208b-3p
622	20517110	rno-miR-216b-5p	MIMAT0017846	-0.0241579	down	0.963148	4.01605	4.04021	3.46461	3.80811	4.44626	4.77544	4.20976	3.46461	MIMAT0017846_st	14:109655062-109655083 (+)	22	AAAUCUCUGCAGGCAAAUGUGA	rno-miR-216b-5p	rno-miR-216b-5p
623	20517111	rno-miR-216b-3p	MIMAT0017847	-0.239725	down	0.221031	0.739976	0.979701	1.08538	0.478792	1.01874	0.751492	0.834985	0.989645	MIMAT0017847_st	14:109655101-109655120 (+)	20	CACACUUACUUGUAGAGAUU	rno-miR-216b-3p	rno-miR-216b-3p
624	20517112	rno-miR-3568	MIMAT0017848	0.343382	up	0.0755021	0.947959	0.604577	0.638558	1.22204	0.606197	0.743198	0.568975	0.878637	MIMAT0017848_st	10:10778378-10778399 (-)	22	UGUUCUUCCCGUGCAGAAGCAG	rno-miR-3568	rno-miR-3568
625	20517113	rno-miR-3569	MIMAT0017849	0.130671	up	0.261775	5.44042	5.30974	5.31346	5.37821	5.17209	5.37821	5.44368	5.56483	MIMAT0017849_st	1:85634982-85635002 (+)	21	GGAGGACAGCAGACUCAGGUC	rno-miR-3569	rno-miR-3569
626	20517114	rno-miR-3570	MIMAT0017850	-0.146021	down	0.462595	1.18255	1.32857	1.63458	1.27441	1.07349	1.23737	1.27764	1.03587	MIMAT0017850_st	13:51132571-51132592 (-)	22	GGUACAAUCAACGGUCGAUGGU	rno-miR-3570	rno-miR-3570
627	20517115	rno-miR-3571	MIMAT0017851	0.230874	up	0.24031	4.79601	4.56513	4.67422	5.03069	4.49495	4.49495	4.52623	4.86239	MIMAT0017851_st	18:2191684-2191706 (+)	23	UACACACUUCUUUACAUUCCAUA	rno-miR-3571	rno-miR-3571
628	20517116	rno-miR-1949	MIMAT0017852	-0.202537	down	0.246279	4.98233	5.18486	5.24039	5.19867	5.32671	4.89941	4.98749	4.8489	MIMAT0017852_st	18:28178280-28178302 (+)	23	UAUACCAGGAUGUCAGCAUAGUU	rno-miR-1949	rno-miR-1949
629	20517117	rno-miR-3572	MIMAT0017853	-0.363556	down	0.338372	1.78702	2.15057	1.98359	2.32912	2.25708	1.20924	2.21105	1.82269	MIMAT0017853_st	1:63874013-63874036 (-)	24	UUACACUUGCCCUUUUUUCCCCAG	rno-miR-3572	rno-miR-3572
630	20517118	rno-miR-1188-5p	MIMAT0017854	0.135215	up	0.541433	4.19685	4.06164	3.93979	3.90269	4.08238	4.5578	4.16275	4.13008	MIMAT0017854_st	6:134203866-134203886 (+)	21	UGGUGUGAGGUUGGGCCAGGA	rno-miR-1188-5p	rno-miR-1188-5p
631	20517119	rno-miR-1188-3p	MIMAT0017855	0.0849033	up	0.730191	4.43411	4.3492	4.3389	4.5578	4.70087	4.53475	4.00784	4.20976	MIMAT0017855_st	6:134203904-134203920 (+)	17	CGAGGCUCCCCACCACA	rno-miR-1188-3p	rno-miR-1188-3p
632	20517120	rno-miR-3573-5p	MIMAT0017856	0.149876	up	0.683894	2.21957	2.06969	1.85461	2.60505	2.21105	1.57547	2.14341	2.47818	MIMAT0017856_st	X:87164927-87164948 (+)	22	UGAGGGGCAGUGAUAGAAAGGA	rno-miR-3573-5p	rno-miR-3573-5p
633	20517121	rno-miR-3573-3p	MIMAT0017857	0.347965	up	0.284602	3.76016	3.4122	3.32375	3.43644	3.47641	3.53023	3.43644	4.31382	MIMAT0017857_st	X:87164969-87164991 (+)	23	UUCCUAACUCUGCCCCCUCCCAU	rno-miR-3573-3p	rno-miR-3573-3p
634	20517122	rno-miR-1193-5p	MIMAT0017858	0.528082	up	0.341056	3.40721	2.87913	3.55883	2.92938	2.16411	3.88954	2.91444	3.40271	MIMAT0017858_st	6:134395227-134395246 (+)	20	AUGGUAAACCGGUGACGUGC	rno-miR-1193-5p	rno-miR-1193-5p
635	20517123	rno-miR-1193-3p	MIMAT0017859	0.227145	up	0.50802	1.46301	1.23586	1.04823	1.3499	1.07849	1.96063	1.58086	1.07849	MIMAT0017859_st	6:134395262-134395283 (+)	22	UAGGUCACCCGUUUUACUAUCC	rno-miR-1193-3p	rno-miR-1193-3p
636	20517124	rno-miR-3574	MIMAT0017860	-0.409968	down	0.214277	4.34018	4.75014	4.94399	3.85649	4.64422	4.41445	4.66222	4.74959	MIMAT0017860_st	1:201415679-201415700 (+)	22	UCAGCCGCUGUCACACGCACAG	rno-miR-3574	rno-miR-3574
637	20517125	rno-miR-3575	MIMAT0017861	-0.12571	down	0.687155	4.91908	5.04479	5.21652	4.98749	4.88397	5.35529	5.03387	4.41445	MIMAT0017861_st	4:160841393-160841410 (+)	18	ACUGCUGGGUAAGACGAG	rno-miR-3575	rno-miR-3575
638	20517126	rno-miR-3576	MIMAT0017862	-0.149024	down	0.591184	2.82868	2.9777	2.61145	2.9901	2.8963	2.6711	3.42534	2.82483	MIMAT0017862_st	6:134408925-134408946 (-)	22	ACACACCAAGGAUAAUUUCUCC	rno-miR-3576	rno-miR-3576
639	20517127	rno-miR-3577	MIMAT0017863	-0.584644	down	0.00424828	1.11311	1.69776	1.56009	1.03587	1.77493	1.25739	1.75825	1.04608	MIMAT0017863_st	10:105897838-105897858 (+)	21	UCUGUCCCUCUUGGCCCUUAG	rno-miR-3577	rno-miR-3577
640	20517128	rno-miR-1912-5p	MIMAT0017864	-0.111857	down	0.1592	10.8034	10.9152	10.8864	10.9296	10.9296	10.7402	10.9296	10.7402	MIMAT0017864_st	X:31199414-31199434 (-)	21	UGCUCAUUGCAUGGGCUAUGU	rno-miR-1912-5p	rno-miR-1912-5p
641	20517129	rno-miR-1912-3p	MIMAT0017865	-0.280961	down	0.0412417	0.685944	0.966904	0.97887	0.851592	0.972782	0.680985	0.949062	0.525255	MIMAT0017865_st	X:31199379-31199397 (-)	19	CACAGAACAUGCAGUGAGA	rno-miR-1912-3p	rno-miR-1912-3p
642	20517130	rno-miR-3578	MIMAT0017866	-0.228285	down	0.371124	0.953057	1.18134	0.935314	1.14967	1.04608	0.739702	1.56263	0.969798	MIMAT0017866_st	6:134424791-134424812 (-)	22	GCGAAUAUAACACGGUCGAUCU	rno-miR-3578	rno-miR-3578
643	20517131	rno-miR-3579	MIMAT0017867	0.052198	up	0.472347	0.693912	0.641714	0.568975	0.5967	0.722198	0.745335	0.633969	0.739702	MIMAT0017867_st	6:134390999-134391020 (-)	22	GCGCAUGUUCUAUGGUCAACCA	rno-miR-3579	rno-miR-3579
644	20517132	rno-miR-3580-5p	MIMAT0017868	0.231245	up	0.381474	1.13641	0.905168	0.873202	1.27441	0.878637	0.680985	0.963665	1.45384	MIMAT0017868_st	X:152867175-152867196 (-)	22	UGCUUGUACUUAUUCUGGUGAC	rno-miR-3580-5p	rno-miR-3580-5p
645	20517133	rno-miR-3580-3p	MIMAT0017869	-0.107661	down	0.776617	1.13873	1.24639	0.935314	1.57547	1.00241	0.873745	1.80144	0.96696	MIMAT0017869_st	X:152867141-152867162 (-)	22	UGACUAGGGUAGUAUGAGUAGA	rno-miR-3580-3p	rno-miR-3580-3p
646	20517134	rno-miR-409b	MIMAT0017870	0.440545	up	0.0830027	1.26055	0.820005	0.769213	1.00744	1.05683	1.51138	0.633969	1.26283	MIMAT0017870_st	6:134424548-134424570 (-)	23	AGGGGUUCACCGAGCAACAUUCG	rno-miR-409b	rno-miR-409b
647	20517135	rno-miR-3596b	MIMAT0017871	0.103763	up	0.572994	1.45937	1.35561	1.14967	1.21277	1.42316	1.49739	1.49401	1.66796	MIMAT0017871_st	17:22121909-22121928 (-)	20	AACUAUGCAACCUACUACCU	rno-miR-3596b	rno-miR-3596b
648	20517136	rno-miR-133c	MIMAT0017872	-0.0838477	down	0.716851	1.28615	1.37	1.47507	1.3096	1.66796	1.18736	0.96696	1.36149	MIMAT0017872_st	18:2189230-2189250 (+)	21	CAGCUGGUUGAAGGGGACCAA	rno-miR-133c	rno-miR-133c
649	20517137	rno-miR-3583-5p	MIMAT0017873	-0.284466	down	0.311227	1.1465	1.43096	1.76216	0.798043	1.18083	1.29846	1.3499	1.34299	MIMAT0017873_st	5:152608955-152608978 (-)	24	AGCAUGAAGAGUUCAGAUCACGUU	rno-miR-3583-5p	rno-miR-3583-5p
650	20517138	rno-miR-3583-3p	MIMAT0017874	0.114869	up	0.63947	5.46945	5.35458	5.51161	5.28272	5.09342	5.28606	5.45872	5.83958	MIMAT0017874_st	5:152608916-152608937 (-)	22	CCUGACUUCUCUCUUCAUGCAG	rno-miR-3583-3p	rno-miR-3583-3p
651	20517139	rno-miR-3584-5p	MIMAT0017875	0.0204322	up	0.890236	0.858854	0.838422	0.83272	0.843177	0.74864	0.644968	0.933905	1.08842	MIMAT0017875_st	1:253307539-253307556 (-)	18	GGGAGGAGUCCAGGAGGC	rno-miR-3584-5p	rno-miR-3584-5p
652	20517140	rno-miR-3584-3p	MIMAT0017876	-0.207586	down	0.445102	1.01942	1.22701	0.999202	1.30042	1.12552	1.06868	1.5563	0.689158	MIMAT0017876_st	1:253307499-253307517 (-)	19	GCCCGCAUCUCUGGAUCCC	rno-miR-3584-3p	rno-miR-3584-3p
653	20517141	rno-miR-3596c	MIMAT0017877	0.04618	up	0.708314	0.812403	0.766223	0.668678	0.963665	0.739702	0.638558	0.890288	0.834985	MIMAT0017877_st	1:56487148-56487168 (-)	21	ACUAUACAACCUCCUACCUCA	rno-miR-3596c	rno-miR-3596c
654	20517142	rno-miR-3585-5p	MIMAT0017878	-0.190004	down	0.256042	6.47306	6.66306	6.67434	6.43014	6.80215	6.69286	6.51269	6.29616	MIMAT0017878_st	X:154164132-154164153 (-)	22	UUCACAAGAAGGUGUCUUUCAU	rno-miR-3585-5p	rno-miR-3585-5p
655	20517143	rno-miR-3585-3p	MIMAT0017879	-0.150945	down	0.509602	1.50356	1.65451	1.93567	1.20376	1.53385	1.71353	1.49401	1.59339	MIMAT0017879_st	X:154164100-154164118 (-)	19	UGAACGGCCCUUGUUGUGA	rno-miR-3585-3p	rno-miR-3585-3p
656	20517144	rno-miR-3586-5p	MIMAT0017880	1.11522	up	0.457475	9.81494	8.69972	6.13831	10.5408	9.58987	9.20783	10.371	9.69619	MIMAT0017880_st	7:110979315-110979331 (+)	17	UCCCUGUCCUCAAGGAG	rno-miR-3586-5p	rno-miR-3586-5p
657	20517145	rno-miR-3586-3p	MIMAT0017881	-0.06643	down	0.868803	1.27039	1.33682	1.45936	1.74045	0.89637	1.36149	1.65473	0.70923	MIMAT0017881_st	7:110979355-110979377 (+)	23	AUACUAGACUGUGAGCUCCUCGA	rno-miR-3586-3p	rno-miR-3586-3p
658	20517146	rno-miR-219b	MIMAT0017882	0.548663	up	0.71286	5.99528	5.44661	3.33833	7.62415	6.14797	5.7588	6.85354	4.60289	MIMAT0017882_st	3:8833920-8833941 (+)	22	AGAUGUCCAGCCACAAUUCUCG	rno-miR-219b	rno-miR-219b
659	20517147	rno-miR-3587	MIMAT0017883	0.194052	up	0.517066	1.94	1.74594	2.18233	2.13507	1.5615	2.07001	1.49401	1.61491	MIMAT0017883_st	4:58108147-58108167 (+)	21	AACACUGAUUUCAAAUGGUGC	rno-miR-3587	rno-miR-3587
660	20517148	rno-miR-702-5p	MIMAT0017884	0.329332	up	0.0885522	2.80761	2.47828	2.35995	2.76112	2.6711	3.01746	2.40379	2.64425	MIMAT0017884_st	12:20861557-20861577 (+)	21	GUGAGUGGGGUGGUUGGCAUG	rno-miR-702-5p	rno-miR-702-5p
661	20517149	rno-miR-702-3p	MIMAT0017885	1.03642	up	0.121667	3.64449	2.60807	2.6613	4.31026	1.8941	3.13132	3.26883	3.49189	MIMAT0017885_st	12:20861637-20861659 (+)	23	UGCCCACCCUUUACCCCACUCCA	rno-miR-702-3p	rno-miR-702-3p
662	20517150	rno-miR-3596a	MIMAT0017886	0.121169	up	0.601672	6.44118	6.32001	6.00914	6.34962	6.71646	6.51269	6.23443	6.46123	MIMAT0017886_st	8:44525785-44525806 (-)	22	AACUAUACAACCUACUACCUCA	rno-miR-3596a	rno-miR-3596a
663	20517151	rno-miR-3588	MIMAT0017887	-0.0691755	down	0.862816	1.22808	1.29726	1.71074	1.64766	0.68703	1.01298	1.49401	1.02361	MIMAT0017887_st	11:16443682-16443703 (-)	22	UCACAAGUUAGGGUCUCAGGGA	rno-miR-3588	rno-miR-3588
664	20517152	rno-miR-3589	MIMAT0017888	0.0368361	up	0.868633	0.898652	0.861816	0.589518	0.89379	0.89552	0.6464	1.10041	1.15577	MIMAT0017888_st	X:145929001-145929022 (+)	22	GAGGAAACCAGCAAGUGUUGAC	rno-miR-3589	rno-miR-3589
665	20517153	rno-miR-3590-5p	MIMAT0017889	0.0471305	up	0.666001	0.932757	0.885626	0.972782	0.887815	0.98647	1.00744	0.697627	0.903013	MIMAT0017889_st	3:67949607-67949627 (+)	21	UGCCCUUUUAACAUUGCACUG	rno-miR-3590-5p	rno-miR-3590-5p
666	20517154	rno-miR-3590-3p	MIMAT0017890	-0.284821	down	0.408963	1.00289	1.28771	1.44746	0.867868	0.704922	1.10041	1.71074	1.04038	MIMAT0017890_st	3:67949648-67949669 (+)	22	UAGCACAAUGUGAAAAGAGCUC	rno-miR-3590-3p	rno-miR-3590-3p
667	20517155	rno-miR-2985	MIMAT0017891	-0.0508671	down	0.890458	7.42043	7.4713	7.82641	7.12451	7.60498	7.89013	6.9825	7.24664	MIMAT0017891_st	2:172272191-172272212 (-)	22	UGUUAUAGUAUCCCACCUACCC	rno-miR-2985	rno-miR-2985
668	20517156	rno-miR-1249	MIMAT0017892	0.137391	up	0.302597	7.45849	7.3211	7.46528	7.51222	7.28515	7.28515	7.21288	7.57812	MIMAT0017892_st	7:122973544-122973565 (-)	22	ACGCCCUUCCCCCCCUUCUUCA	rno-miR-1249	rno-miR-1249
669	20517157	rno-miR-3591	MIMAT0017893	-0.138872	down	0.577635	1.6316	1.77047	1.49739	1.94511	1.76216	1.56013	2.05187	1.38956	MIMAT0017893_st	18:61512761-61512780 (-)	20	AACACCAUUGUCACACUCCA	rno-miR-3591	rno-miR-3591
670	20517158	rno-miR-344b-1-3p	MIMAT0017894	0.0360128	up	0.907614	1.09991	1.06389	0.887815	1.07849	1.57547	0.882987	0.728395	1.33824	MIMAT0017894_st	1:115319479-115319500 (-)	22	GAUAUAACCAAAGCCCGACUGU	rno-miR-344b-1-3p	rno-miR-344b-1-3p
671	20517159	rno-miR-3592	MIMAT0017895	0.128739	up	0.521098	1.24603	1.11729	1.13812	1.19286	1.30042	1.51928	0.913327	1.02594	MIMAT0017895_st	6:134415311-134415331 (-)	21	AAGUGUUGUCCGUGAAUGAUU	rno-miR-3592	rno-miR-3592
672	20517160	rno-miR-3593-5p	MIMAT0017896	0.0180095	up	0.950896	1.69599	1.67798	1.62463	2.18233	1.78403	1.65473	1.62529	1.25092	MIMAT0017896_st	6:76163585-76163606 (-)	22	UGGCCUCCGCAGGGUUGAAGCU	rno-miR-3593-5p	rno-miR-3593-5p
673	20517161	rno-miR-3593-3p	MIMAT0017897	0.127008	up	0.324004	0.857351	0.730343	0.525255	0.769213	0.819307	0.873745	0.846468	0.929095	MIMAT0017897_st	6:76163553-76163574 (-)	22	CUUCAACCUUAAGGGGGCCUCA	rno-miR-3593-3p	rno-miR-3593-3p
674	20517162	rno-miR-3594-5p	MIMAT0017898	0.12675	up	0.683723	5.20001	5.07326	5.32671	4.90425	5.03069	5.70829	4.86239	4.98749	MIMAT0017898_st	10:109476519-109476539 (-)	21	CCCAGGGCAGAGCAGUGUGAA	rno-miR-3594-5p	rno-miR-3594-5p
675	20517163	rno-miR-3594-3p	MIMAT0017899	-1.47864	down	0.322797	5.10349	6.58214	8.08013	5.582	5.52797	3.07067	6.13831	6.65781	MIMAT0017899_st	10:109476484-109476505 (-)	22	CACACCGCCUCUGCCCGCUAGU	rno-miR-3594-3p	rno-miR-3594-3p
676	20517164	rno-miR-3120	MIMAT0017900	-0.591531	down	0.349191	5.05504	5.64657	5.28272	4.70087	5.03387	5.56483	6.62312	4.89941	MIMAT0017900_st	13:77916214-77916234 (-)	21	CACAGCAAGUGUAGACAGGCA	rno-miR-3120	rno-miR-3120
677	20517165	rno-miR-741-5p	MIMAT0017901	0.0580517	up	0.771627	1.17881	1.12076	1.42118	1.09511	0.828367	1.11273	1.11273	1.32859	MIMAT0017901_st	X:152842687-152842707 (-)	21	UACAUAGAUUGGUACCUAUCA	rno-miR-741-5p	rno-miR-741-5p
678	20517166	rno-miR-741-3p	MIMAT0017902	0.136678	up	0.331421	1.23228	1.0956	1.15577	1.24425	1.27291	1.21521	0.858127	1.23737	MIMAT0017902_st	X:152842650-152842671 (-)	22	AAAGAUGCCACGCUAUGUAGAU	rno-miR-741-3p	rno-miR-741-3p
679	20517167	rno-miR-3595	MIMAT0017903	-0.0681727	down	0.919195	3.29604	3.36421	3.54672	2.10946	3.38093	4.20976	3.16499	3.5689	MIMAT0017903_st	6:134404740-134404758 (-)	19	GUGGAUUUUCCUCUACGAU	rno-miR-3595	rno-miR-3595
680	20517168	rno-miR-328b-3p	MIMAT0017904	-0.106474	down	0.548103	9.57954	9.68602	9.52552	9.83634	9.83634	9.52552	9.69619	9.37677	MIMAT0017904_st	14:46393697-46393714 (+)	18	CUGGCCCUCUCUGCCCUA	rno-miR-328b-3p	rno-miR-328b-3p
681	20522996	rno-miR-1199-5p	MIMAT0031125	-0.127225	down	0.52613	9.75242	9.87965	9.76627	9.86959	10.0031	9.97053	9.86959	9.41714	MIMAT0031125_st	19:25826580-25826599 (+)	20	UCUGAGUCCGGGUCGCGCGG	rno-miR-1199-5p	rno-miR-1199-5p
682	20522997	rno-miR-1199-3p	MIMAT0031126	0.195775	up	0.0827724	6.06015	5.86437	5.83958	6.03306	5.80381	5.94973	5.94973	6.19765	MIMAT0031126_st	19:25826624-25826644 (+)	21	UGCGGCCGGUGCUCAGCCGGC	rno-miR-1199-3p	rno-miR-1199-3p
683	20524311	rno-miR-1839-5p	MIMAT0024843	-0.185399	down	0.264543	0.730019	0.915418	1.12552	0.668678	0.814102	0.92008	0.806637	0.601298	MIMAT0024843_st	1:137744050-137744071 (+)	22	AAGGUAGAUAGAACAGGUCUUG	rno-miR-1839-5p	rno-miR-1839-5p
684	20524312	rno-miR-1839-3p	MIMAT0024844	-0.088882	down	0.843984	1.32583	1.41472	1.8209	1.48087	1.75825	1.56013	0.664998	0.936503	MIMAT0024844_st	1:137744089-137744110 (+)	22	AGACCUACUUAUCUACCAACAG	rno-miR-1839-3p	rno-miR-1839-3p
685	20524313	rno-miR-3068-5p	MIMAT0024845	0.356769	up	0.0738877	0.932719	0.57595	0.796155	0.98647	0.391072	0.758037	0.540623	1.05365	MIMAT0024845_st	6:111674282-111674306 (-)	25	UUGGAGUUCAUGCAAGUUCUAACCA	rno-miR-3068-5p	rno-miR-3068-5p
686	20524314	rno-miR-3068-3p	MIMAT0024846	-0.281201	down	0.262979	0.861279	1.14248	1.10041	0.525255	0.937465	0.975165	1.38956	1.08342	MIMAT0024846_st	6:111674244-111674265 (-)	22	GGUGAAUUGCAGUACUCCAACA	rno-miR-3068-3p	rno-miR-3068-3p
687	20524315	rno-miR-1843-5p	MIMAT0024847	-0.848159	down	0.512359	4.72156	5.56972	3.84279	6.27173	6.29616	3.59095	6.57021	4.302	MIMAT0024847_st	6:103413955-103413975 (-)	21	UAUGGAGGUCUCUGUCUGACU	rno-miR-1843-5p	rno-miR-1843-5p
688	20524316	rno-miR-1843-3p	MIMAT0024848	0.0760666	up	0.853458	3.849	3.77294	3.16499	4.31739	4.13681	3.5689	4.01702	3.66073	MIMAT0024848_st	6:103413916-103413937 (-)	22	UCUGAUCGUUCACCUCCAUACA	rno-miR-1843-3p	rno-miR-1843-3p
689	20524317	rno-miR-509-5p	MIMAT0024849	0.193459	up	0.360535	0.911662	0.718203	0.801435	0.722198	0.941873	0.951575	0.4113	1.06121	MIMAT0024849_st	X:154191035-154191057 (-)	23	UACUCCAGAAUAUGGCAAUCAUG	rno-miR-509-5p	rno-miR-509-5p
690	20524318	rno-miR-509-3p	MIMAT0024850	0.355689	up	0.102828	1.50913	1.15344	1.3096	1.23737	1.13812	1.73372	1.0126	1.5563	MIMAT0024850_st	X:154191001-154191022 (-)	22	UGAUUGACAUGUCUGCAGUGGA	rno-miR-509-3p	rno-miR-509-3p
691	20524319	rno-miR-1306-5p	MIMAT0024851	0.0724953	up	0.619005	11.6401	11.5676	11.3391	11.5116	11.7296	11.6789	11.6339	11.7296	MIMAT0024851_st	11:84703725-84703746 (+)	22	CCACCUCCCCUGCAAACGUCCA	rno-miR-1306-5p	rno-miR-1306-5p
692	20524320	rno-miR-1306-3p	MIMAT0024852	-0.213734	down	0.686074	3.88182	4.09556	3.44874	3.16499	4.57806	4.22923	4.25988	4.25125	MIMAT0024852_st	11:84703764-84703785 (+)	22	GACGUUGGCUCUGGUGGUGAUG	rno-miR-1306-3p	rno-miR-1306-3p
693	20524321	rno-miR-3473	MIMAT0024853	-0.0538065	down	0.827011	4.77095	4.82476	4.48771	4.74959	5.25321	4.86239	4.73334	4.70087	MIMAT0024853_st	13:40705747-40705768 (+)	22	UCUAGGGCUGGAGAGAUGGCUA	rno-miR-3473	rno-miR-3473
694	20524322	rno-miR-6215	MIMAT0024854	-0.570603	down	0.111201	0.701825	1.27243	0.745335	0.830283	1.63458	0.706217	1.43737	0.568975	MIMAT0024854_st	5:158395614-158395633 (-)	20	UUUAGGGUUGCAGAGCCAGG	rno-miR-6215	rno-miR-6215
695	20524323	rno-miR-378b	MIMAT0024855	0.279212	up	0.390646	1.65463	1.37542	1.4828	1.83171	1.44484	2.01945	1.19861	1.11273	MIMAT0024855_st	5:5156403-5156423 (-)	21	AGUGGACUUGGAGUCAGAAGG	rno-miR-378b	rno-miR-378b
696	20524324	rno-miR-6216	MIMAT0024856	-0.160072	down	0.439331	0.618653	0.778725	0.53076	0.755657	1.04038	0.70923	0.765033	0.391072	MIMAT0024856_st	3:41992563-41992585 (-)	23	GAUACACAGAGGCAGGAGGAGAA	rno-miR-6216	rno-miR-6216
697	20524589	rno-miR-6314	MIMAT0025047	-0.398034	down	0.138091	1.21728	1.61531	1.71353	1.61115	1.56263	1.14431	1.56978	0.89637	MIMAT0025047_st	2:204485578-204485599 (+)	22	AGGCACUGACAGAUCUGAUGGU	rno-miR-6314	rno-miR-6314
698	20524590	rno-miR-3099	MIMAT0025048	0.498089	up	0.0215346	1.85215	1.35406	1.48087	1.65473	1.29066	2.07001	1.29066	1.83171	MIMAT0025048_st	1:65425869-65425890 (-)	22	UAGGCUAGAAAGAGGUUGGGGA	rno-miR-3099	rno-miR-3099
699	20524591	rno-miR-344i	MIMAT0025049	0.0189944	up	0.954157	0.928831	0.909836	0.89379	0.628742	0.837995	0.615038	0.997723	1.54271	MIMAT0025049_st	1:116215051-116215072 (+)	22	CUCUAGCCAGGGCUUGACUGCA	rno-miR-344i	rno-miR-344i
700	20524592	rno-miR-6315	MIMAT0025050	0.223501	up	0.0702261	1.2318	1.0083	1.01874	1.13122	0.927662	1.38956	1.07849	1.17461	MIMAT0025050_st	1:208708805-208708827 (-)	23	UCUGGACAGGACAGGCCCUGAGC	rno-miR-6315	rno-miR-6315
701	20524593	rno-miR-3102	MIMAT0025051	0.306669	up	0.0162633	2.14328	1.83661	1.96063	2.16411	1.73372	2.19759	1.81549	2.06815	MIMAT0025051_st	1:158330179-158330199 (-)	21	CUCUACUCCCUGCCCCAGCCA	rno-miR-3102	rno-miR-3102
702	20524594	rno-miR-344g	MIMAT0025052	-0.234909	down	0.626942	4.38744	4.62235	4.22923	5.06155	4.86239	4.42535	4.77544	3.67544	MIMAT0025052_st	1:116057487-116057508 (-)	22	AGUCAGGCUCCUGGCAGGAGUC	rno-miR-344g	rno-miR-344g
703	20524595	rno-miR-6316	MIMAT0025053	0.266811	up	0.145703	3.81848	3.55167	3.58656	3.92494	3.46461	3.99203	3.60384	3.53848	MIMAT0025053_st	1:263752251-263752273 (+)	23	CAUGUCUGUCUCUGUGGCACACA	rno-miR-6316	rno-miR-6316
704	20524596	rno-miR-6317	MIMAT0025054	0.0184675	up	0.888092	1.17348	1.15501	0.935314	1.08342	1.24792	1.27291	1.28179	1.1641	MIMAT0025054_st	1:245709311-245709331 (-)	21	GUGAACCUGAGAGAAAGGCUC	rno-miR-6317	rno-miR-6317
705	20524597	rno-miR-6318	MIMAT0025055	-0.239351	down	0.162183	1.62995	1.8693	1.68094	1.70448	2.0876	1.48087	1.83935	1.70448	MIMAT0025055_st	19:35122005-35122026 (-)	22	CUGCCUGGCGCAGGGCCUGUAG	rno-miR-6318	rno-miR-6318
706	20524598	rno-miR-6319	MIMAT0025056	0.114271	up	0.662507	1.40043	1.28616	1.25983	1.44746	1.27764	0.959407	1.321	1.79442	MIMAT0025056_st	17:40031942-40031962 (+)	21	UCAUUCUCGCUGCUCUGGAGU	rno-miR-6319	rno-miR-6319
707	20524599	rno-miR-3075	MIMAT0025057	0.531504	up	0.208291	3.5591	3.0276	2.88146	3.97166	3.53023	3.57433	2.6711	3.13132	MIMAT0025057_st	16:1112138-1112161 (+)	24	UGUCUGGGAGCAGCCAAGGACAAG	rno-miR-3075	rno-miR-3075
708	20524600	rno-miR-6320	MIMAT0025058	-0.0121302	down	0.955639	0.895136	0.907266	0.655322	0.873202	0.867868	0.680985	1.19861	1.13122	MIMAT0025058_st	15:45729863-45729885 (-)	23	UGAACAUGCUUGUAAUCUCAGCA	rno-miR-6320	rno-miR-6320
709	20524601	rno-miR-6321	MIMAT0025059	-0.36309	down	0.668436	2.47647	2.83956	3.20949	3.83699	2.32912	2.30644	2.98007	1.28598	MIMAT0025059_st	14:21039073-21039095 (-)	23	UACUGCAGUGAGUUCUAUGAAGC	rno-miR-6321	rno-miR-6321
710	20524602	rno-miR-1298	MIMAT0025060	-0.0383957	down	0.849369	0.986793	1.02519	1.30042	0.969798	1.00241	1.18914	0.77274	0.801435	MIMAT0025060_st	X:31139159-31139180 (-)	22	UUCAUUCGGCUGUCCAGAUGUA	rno-miR-1298	rno-miR-1298
711	20524603	rno-miR-6322	MIMAT0025061	0.152734	up	0.351403	4.68746	4.53473	4.77544	4.8489	4.41445	4.61061	4.41431	4.60289	MIMAT0025061_st	12:24869336-24869357 (-)	22	UGUCUGUACCACAUGGCACGGU	rno-miR-6322	rno-miR-6322
712	20524604	rno-miR-6323	MIMAT0025062	-0.454349	down	0.449871	2.54696	3.00131	2.96425	1.88181	2.39465	2.47818	3.64502	3.28088	MIMAT0025062_st	11:83302971-83302995 (+)	25	UGGAACUCCAUCUCUGGUCUGUGCA	rno-miR-6323	rno-miR-6323
713	20524605	rno-miR-6324	MIMAT0025063	0.232062	up	0.359733	1.06799	0.835927	0.610907	1.321	1.20376	0.949062	0.693108	0.933905	MIMAT0025063_st	11:36339331-36339353 (-)	23	UCAGUAGGCCAGACAGCAAGCAC	rno-miR-6324	rno-miR-6324
714	20524606	rno-miR-6325	MIMAT0025064	0.0833657	up	0.740297	1.04586	0.962495	0.956417	0.798043	1.25983	1.3499	0.671237	0.989645	MIMAT0025064_st	11:36691192-36691214 (+)	23	AAAGUCAGACAGAGACUCUGCAG	rno-miR-6325	rno-miR-6325
715	20524607	rno-miR-6326	MIMAT0025065	0.0784677	up	0.836656	1.09018	1.01172	0.862773	0.897188	0.862773	1.72261	1.3096	0.650752	MIMAT0025065_st	10:62782533-62782555 (+)	23	CUGGUCUGUAAAGGGACACAGCA	rno-miR-6326	rno-miR-6326
716	20524608	rno-miR-6327	MIMAT0025066	0.12109	up	0.500455	0.986021	0.86493	0.935314	0.878637	0.834985	0.779005	0.824492	1.30042	MIMAT0025066_st	10:69835885-69835903 (-)	19	CGGACUGUAGAUCCAUCUC	rno-miR-6327	rno-miR-6327
717	20524609	rno-miR-6328	MIMAT0025067	0.394486	up	0.465872	3.79725	3.40276	3.36255	3.30301	3.07067	3.40271	3.77507	4.68602	MIMAT0025067_st	20:3032803-3032823 (+)	21	AGGCCUGCUCUGAGCCCCCGC	rno-miR-6328	rno-miR-6328
718	20524610	rno-miR-6329	MIMAT0025068	-0.0619915	down	0.798026	1.10051	1.1625	1.5563	1.18083	1.08342	0.922078	0.847775	1.19861	MIMAT0025068_st	8:55466072-55466094 (-)	23	AAUGUGACUCAGCUAUCUGAACA	rno-miR-6329	rno-miR-6329
719	20524611	rno-miR-6330	MIMAT0025069	0.360907	up	0.231608	3.81555	3.45465	3.82504	3.70063	2.98007	3.85649	3.55883	3.88954	MIMAT0025069_st	8:110244823-110244844 (-)	22	UAUAAUGACCAGAUCUGGGUCA	rno-miR-6330	rno-miR-6330
720	20524612	rno-miR-6331	MIMAT0025070	0.679581	up	0.125509	2.63578	1.9562	1.42316	2.91444	1.98359	2.29	2.46184	2.70289	MIMAT0025070_st	6:134409693-134409716 (+)	24	CUUUGGUGGCUUAGUUCUUUGUGC	rno-miR-6331	rno-miR-6331
721	20524613	rno-miR-3072	MIMAT0025071	0.367292	up	0.17486	1.21866	0.851366	1.13122	1.25092	0.78891	1.49173	0.633969	0.913327	MIMAT0025071_st	6:134429948-134429970 (+)	23	UGCCCCCUCCAGGAAGCCUUCUU	rno-miR-3072	rno-miR-3072
722	20524614	rno-miR-679	MIMAT0025072	-0.0732561	down	0.814933	2.03621	2.10947	2.01945	2.58804	2.05187	1.87293	2.25708	1.64766	MIMAT0025072_st	6:134395138-134395158 (+)	21	CAAGGUCUUCCUCACAGUAGC	rno-miR-679	rno-miR-679
723	20524615	rno-miR-6332	MIMAT0025073	-0.277183	down	0.602237	1.87723	2.15442	2.70289	1.18914	1.62529	2.49744	2.13507	1.94511	MIMAT0025073_st	5:167512943-167512965 (+)	23	CGCAGGGACUGCAAGGAGCCGCA	rno-miR-6332	rno-miR-6332
724	20524616	rno-miR-6333	MIMAT0025074	-0.0887828	down	0.640637	1.16639	1.25517	1.25478	1.5156	1.26649	0.953792	1.24425	1.02978	MIMAT0025074_st	5:154263660-154263682 (+)	23	UAGGCUGGACUUGAACAGCCCGC	rno-miR-6333	rno-miR-6333
725	20524617	rno-miR-6334	MIMAT0025075	-0.055057	down	0.747847	1.00984	1.0649	1.17201	1.27441	1.00241	1.00189	1.02028	0.75322	MIMAT0025075_st	3:145879163-145879184 (-)	22	CCAGGCUCUCCCAGCUGCCGGC	rno-miR-6334	rno-miR-6334
726	20528289	rno-miR-7578	MIMAT0029579	0.151149	up	0.297512	0.964034	0.812886	0.98647	1.11937	0.801435	0.847775	0.650752	0.924958	MIMAT0029579_st	3:6372721-6372743 (-)	23	CGUGGCUCGUCUUCUGCCUCAGA	rno-miR-7578	rno-miR-7578
727	20529126	rno-miR-155-5p	MIMAT0030409	-0.397285	down	0.218917	3.76019	4.15747	3.92494	3.93979	4.46929	3.32375	4.07819	4.01702	MIMAT0030409_st	---	23	UUAAUGCUAAUUGUGAUAGGGGU	rno-miR-155-5p	rno-miR-155-5p
728	20529127	rno-miR-155-3p	MIMAT0030410	0.227501	up	0.175345	5.2165	4.98899	5.06155	5.14357	4.73334	5.21652	5.17209	5.28939	MIMAT0030410_st	---	21	CUCCUACCUGUUAGCAUUAAC	rno-miR-155-3p	rno-miR-155-3p
